# Supplementary material
Source: PubMed Central journal article supplement (PMC2552997)

**Nanometer-Sized Amino Acids for the Synthesis of Nanometer-Scale Water-Soluble  
Molecular Rods of Precise Length**

Chris M. Gothard, Nosheen A. Rao, and James S. Nowick\*

Department of Chemistry, University of California, Irvine, Irvine, California 92697-2025.

## Supporting Information Table of Contents

|                                                                               |     |
|-------------------------------------------------------------------------------|-----|
| General Procedures.....                                                       | S4  |
| Fmoc-Abc <sup>2K(Boc)</sup> -OH ( <b>1</b> ) Synthetic Scheme.....            | S5  |
| <b>Synthetic Intermediates (1, 3-8)</b>                                       |     |
| 4-Bromo-2,5-dimethoxybenzoic acid ( <b>3</b> ).....                           | S6  |
| <sup>1</sup> H NMR spectrum (CD <sub>3</sub> SOCD <sub>3</sub> , 298 K).....  | S7  |
| <sup>13</sup> C NMR spectrum (CD <sub>3</sub> SOCD <sub>3</sub> , 298 K)..... | S8  |
| 4-Bromo-2,5-dihydroxybenzoic acid ( <b>4</b> ).....                           | S9  |
| <sup>1</sup> H NMR spectrum (CD <sub>3</sub> SOCD <sub>3</sub> , 298 K).....  | S10 |
| <sup>13</sup> C NMR spectrum (CD <sub>3</sub> SOCD <sub>3</sub> , 298 K)..... | S11 |
| Ester <b>5</b> .....                                                          | S12 |
| <sup>1</sup> H NMR spectrum (CD <sub>3</sub> SOCD <sub>3</sub> , 298 K).....  | S13 |
| <sup>13</sup> C NMR spectrum (CD <sub>3</sub> SOCD <sub>3</sub> , 298 K)..... | S14 |
| Diether <b>6</b> .....                                                        | S15 |
| <sup>1</sup> H NMR spectrum (CD <sub>3</sub> SOCD <sub>3</sub> , 298 K).....  | S16 |
| <sup>13</sup> C NMR spectrum (CD <sub>3</sub> SOCD <sub>3</sub> , 298 K)..... | S17 |
| H-Abc <sup>2K(Boc)</sup> -OCH <sub>2</sub> COPh ( <b>7</b> ).....             | S18 |
| <sup>1</sup> H NMR spectrum (CD <sub>3</sub> SOCD <sub>3</sub> , 298 K).....  | S20 |
| <sup>13</sup> C NMR spectrum (CD <sub>3</sub> SOCD <sub>3</sub> , 298 K)..... | S21 |
| Fmoc- Abc <sup>2K(Boc)</sup> -OCH <sub>2</sub> COPh ( <b>8</b> ).....         | S22 |
| <sup>1</sup> H NMR spectrum (CD <sub>3</sub> SOCD <sub>3</sub> , 358 K).....  | S24 |
| <sup>13</sup> C NMR spectrum (CD <sub>3</sub> SOCD <sub>3</sub> , 298 K)..... | S25 |
| Fmoc- Abc <sup>2K(Boc)</sup> -OH ( <b>1</b> ).....                            | S26 |
| <sup>1</sup> H NMR spectrum (CD <sub>3</sub> SOCD <sub>3</sub> , 328 K).....  | S28 |
| <sup>13</sup> C NMR spectrum (CD <sub>3</sub> SOCD <sub>3</sub> , 298 K)..... | S29 |
| RP-HPLC chromatograph.....                                                    | S30 |
| Abc <sup>2K</sup> Oligomers ( <b>9a-9i</b> ) (representative procedures)..... | S31 |
| H-(Abc <sup>2K</sup> ) <sub>1</sub> -NH <sub>2</sub> <b>9a</b>                |     |
| RP-HPLC chromatograph, ESI-MS spectrum.....                                   | S34 |
| <sup>1</sup> H NMR spectrum (D <sub>2</sub> O, 298 K).....                    | S35 |
| H-(Abc <sup>2K</sup> ) <sub>2</sub> -NH <sub>2</sub> <b>9b</b>                |     |
| RP-HPLC chromatograph, ESI-MS spectrum.....                                   | S36 |
| <sup>1</sup> H NMR spectrum (D <sub>2</sub> O, 298 K).....                    | S37 |
| H-(Abc <sup>2K</sup> ) <sub>3</sub> -NH <sub>2</sub> <b>9c</b>                |     |
| RP-HPLC chromatograph, ESI-MS spectrum.....                                   | S38 |
| <sup>1</sup> H NMR spectrum (D <sub>2</sub> O, 298 K).....                    | S39 |
| H-(Abc <sup>2K</sup> ) <sub>4</sub> -NH <sub>2</sub> <b>9d</b>                |     |
| RP-HPLC chromatograph, ESI-MS spectrum.....                                   | S40 |
| <sup>1</sup> H NMR spectrum (D <sub>2</sub> O, 298 K).....                    | S41 |
| H-(Abc <sup>2K</sup> ) <sub>5</sub> -NH <sub>2</sub> <b>9e</b>                |     |
| RP-HPLC chromatograph, ESI-MS spectrum.....                                   | S42 |
| <sup>1</sup> H NMR spectrum (D <sub>2</sub> O, 298 K).....                    | S43 |
| H-(Abc <sup>2K</sup> ) <sub>6</sub> -NH <sub>2</sub> <b>9f</b>                |     |
| RP-HPLC chromatograph, ESI-MS spectrum.....                                   | S44 |
| <sup>1</sup> H NMR spectrum (D <sub>2</sub> O, 298 K).....                    | S45 |

|                                                                                                                                     |     |
|-------------------------------------------------------------------------------------------------------------------------------------|-----|
| H-(Abc <sup>2K</sup> ) <sub>7</sub> -NH <sub>2</sub> <b>9g</b>                                                                      |     |
| RP-HPLC chromatograph, ESI-MS spectrum.....                                                                                         | S46 |
| <sup>1</sup> H NMR spectrum (D <sub>2</sub> O, 298 K).....                                                                          | S47 |
| H-(Abc <sup>2K</sup> ) <sub>8</sub> -NH <sub>2</sub> <b>9h</b>                                                                      |     |
| RP-HPLC chromatograph, ESI-MS spectrum.....                                                                                         | S48 |
| <sup>1</sup> H NMR spectrum (D <sub>2</sub> O, 298 K).....                                                                          | S49 |
| H-(Abc <sup>2K</sup> ) <sub>10</sub> -NH <sub>2</sub> <b>9i</b>                                                                     |     |
| RP-HPLC chromatograph, ESI-MS spectrum.....                                                                                         | S50 |
| <sup>1</sup> H NMR spectrum (D <sub>2</sub> O, 298 K).....                                                                          | S51 |
| Synthesis of Labeled Oligomers ( <b>10a-10j</b> ) (representative procedures).....                                                  | S52 |
| Ac-(Lys) <sub>2</sub> -Glu(EDANS)-Abc <sup>2K</sup> -Lys(DabcyI)- (Lys) <sub>2</sub> -NH <sub>2</sub> <b>10a</b>                    |     |
| RP-HPLC chromatograph, ESI-MS spectrum.....                                                                                         | S56 |
| Ac-(Lys) <sub>2</sub> -Glu(EDANS)-(Abc <sup>2K</sup> ) <sub>2</sub> -Lys(DabcyI)- (Lys) <sub>2</sub> -NH <sub>2</sub> <b>10b</b>    |     |
| RP-HPLC chromatograph, ESI-MS spectrum.....                                                                                         | S57 |
| Ac-(Lys) <sub>2</sub> -Glu(EDANS)-(Abc <sup>2K</sup> ) <sub>3</sub> -Lys(DabcyI)- (Lys) <sub>2</sub> -NH <sub>2</sub> <b>10c</b>    |     |
| RP-HPLC chromatograph, ESI-MS spectrum.....                                                                                         | S58 |
| Ac-(Lys) <sub>2</sub> -Glu(EDANS)-(Abc <sup>2K</sup> ) <sub>4</sub> -Lys(DabcyI)- (Lys) <sub>2</sub> -NH <sub>2</sub> <b>10d</b>    |     |
| RP-HPLC chromatograph, ESI-MS spectrum.....                                                                                         | S59 |
| Ac-(Lys) <sub>2</sub> -Glu(EDANS)-(Abc <sup>2K</sup> ) <sub>5</sub> -Lys(DabcyI)- (Lys) <sub>2</sub> -NH <sub>2</sub> <b>10e</b>    |     |
| RP-HPLC chromatograph, ESI-MS spectrum.....                                                                                         | S60 |
| Ac-(Lys) <sub>2</sub> -Glu(EDANS)-(Abc <sup>2K</sup> ) <sub>6</sub> -Lys(DabcyI)- (Lys) <sub>2</sub> -NH <sub>2</sub> <b>10f</b>    |     |
| RP-HPLC chromatograph, ESI-MS spectrum.....                                                                                         | S61 |
| Ac-(Lys) <sub>2</sub> -Glu(EDANS)-(Abc <sup>2K</sup> ) <sub>7</sub> -Lys(DabcyI)- (Lys) <sub>2</sub> -NH <sub>2</sub> <b>10g</b>    |     |
| RP-HPLC chromatograph, ESI-MS spectrum.....                                                                                         | S62 |
| Ac-(Lys) <sub>2</sub> -Glu(EDANS)-(Abc <sup>2K</sup> ) <sub>8</sub> -Lys(DabcyI)- (Lys) <sub>2</sub> -NH <sub>2</sub> <b>10h</b>    |     |
| RP-HPLC chromatograph, ESI-MS spectrum.....                                                                                         | S63 |
| Ac-(Lys) <sub>2</sub> -Glu(EDANS)-(Abc <sup>2K</sup> ) <sub>9</sub> -Lys(DabcyI)- (Lys) <sub>2</sub> -NH <sub>2</sub> <b>10i</b>    |     |
| RP-HPLC chromatograph, ESI-MS spectrum.....                                                                                         | S64 |
| Ac-(Lys) <sub>2</sub> -Glu(EDANS)-(Abc <sup>2K</sup> ) <sub>10</sub> -Lys(DabcyI)- (Lys) <sub>2</sub> -NH <sub>2</sub> <b>10j</b>   |     |
| RP-HPLC chromatograph, ESI-MS spectrum.....                                                                                         | S65 |
| Synthesis of Hybrid Peptide H-Arg-Gly-Asp-Phe-(Abc <sup>2K</sup> ) <sub>2</sub> -Arg-Gly-Asp-Phe-NH <sub>2</sub> ( <b>11</b> )..... | S66 |
| RP-HPLC chromatograph, ESI-MS spectrum.....                                                                                         | S67 |
| <sup>1</sup> H NMR spectrum (D <sub>2</sub> O, 298 K).....                                                                          | S68 |
| FRET Experiments of Compounds <b>10a-10j</b> .....                                                                                  | S69 |
| Monte Carlo-stochastic dynamics simulation of H-(Abc <sup>2K</sup> ) <sub>10</sub> -OH.....                                         | S71 |

**General Procedures.** Commercial solvents and reagents were used without further purification, unless otherwise stated. Reactions were carried out under an atmosphere of nitrogen. Solution-phase reactions were monitored by thin-layer chromatography (TLC) and carried out on 250  $\mu\text{m}$  silica gel polyester plates on fluorescent silica gel with UV visualization. Column chromatography was performed on 40–63  $\mu\text{m}$  silica gel (EMD Science) using flash chromatography. Solvents were removed by rotary evaporation. Residual solvents were removed under vacuum ( $< 0.01$  mmHg). Precipitated and recrystallized products were dried under vacuum ( $< 0.01$  mmHg) or by air suction through a filter funnel. High resolution mass spectra were obtained by electrospray ionization (ESI) on a Waters Micromass LCT Premier (instrument variation  $\sigma < 5$  ppm). NMR spectra were recorded using a 500 MHz Bruker AVANCE<sup>TM</sup> spectrometer. Chemical shifts are reported in parts per million (ppm) on the  $\delta$  scale.  $^1\text{H}$  and  $^{13}\text{C}$  NMR spectra in  $\text{CD}_3\text{SOCD}_3$  were referenced with TMS ( $\delta = 0.00$  ppm);  $^1\text{H}$  NMR spectra in  $\text{D}_2\text{O}$  were referenced to HDO at  $\delta = 4.80$  ppm. IR spectra were obtained using a Galaxy Series FTIR 5000. HPLC analysis was performed on an analytical RP-HPLC instrument, using a  $\text{C}_{18}$  column (Alltech, Platinum Rocket, 3 $\mu\text{m}$  packing, 7 mm  $\times$  53 mm).

**Fmoc-Abc<sup>2K(Boc)</sup>-OH (1) Synthetic Scheme.**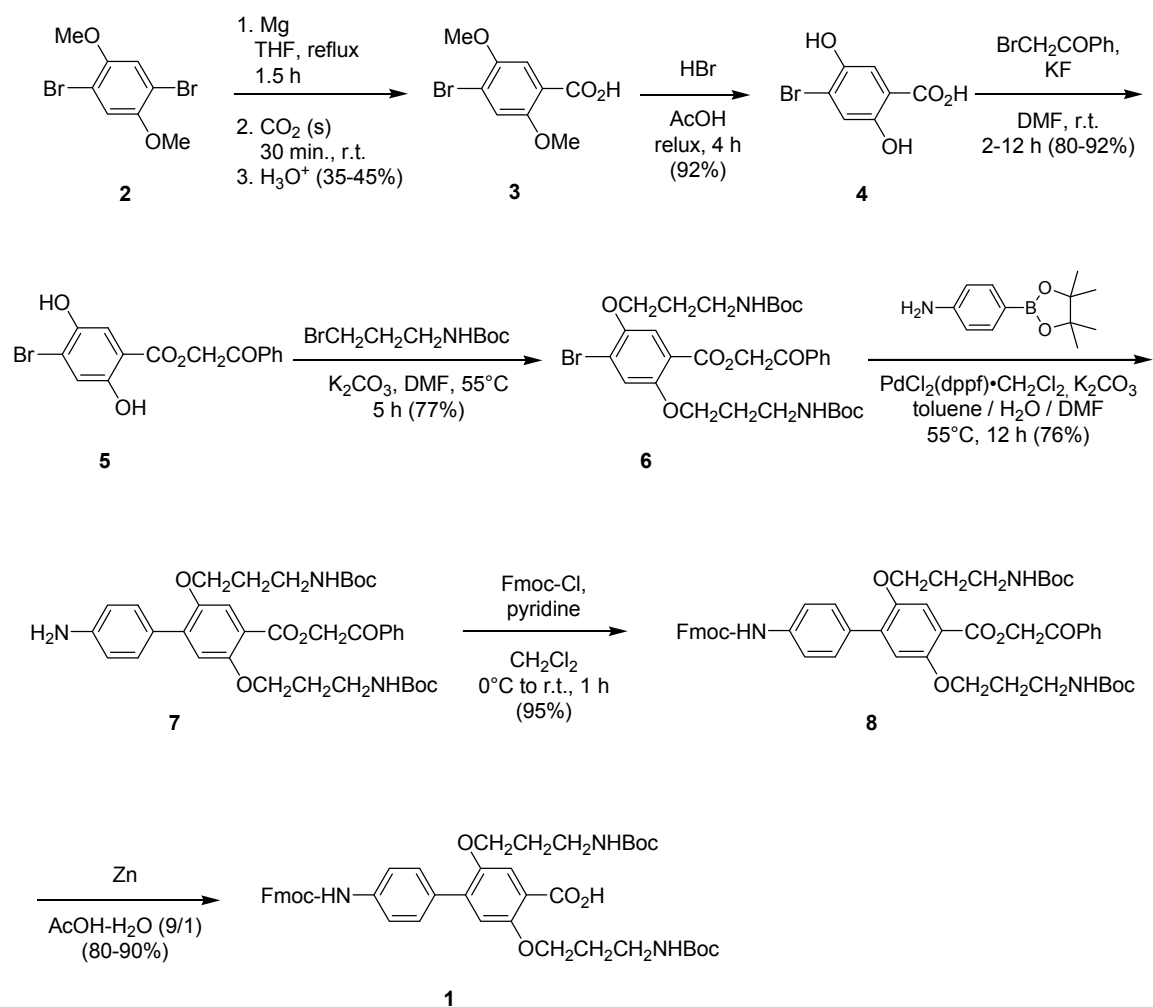



<sup>1</sup>H spectrum  
ppm

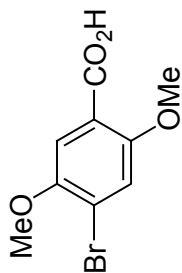

4-bromo-2,5-dimethoxybenzoic acid (**3**)

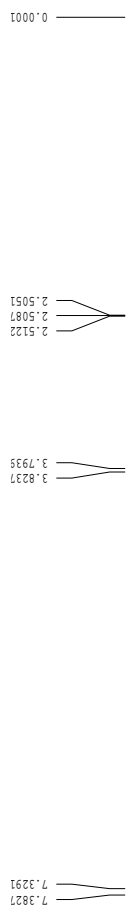

```

Current Data Parameters
USER          cgocha
NAME          cg-10-113
EXPNO        10
PROCNO       1

F2 - Acquisition Parameters
Date_        20060810
Time         21.47
INSTRUM     crys500
PROBHD      5 mm CPCL1 1H-
PULPROG     zgpg30
TD           65536
SOLVENT     DMSO
NS           8
DS           2
SWH          8012.820 Hz
FIDRES      0.098043 Hz
AQ          5.0998774 sec
RG           7.1
DM          62.400 usec
DE          6.00 usec
TE          298.0 K
D1          0.1000000 sec
PCORRECT    0.0100000 sec
NOISE      0.0150000 sec
***** CHANNEL f1 *****
NUC1         1H
P1           8.00 usec
PL1          1.60 dB
SFO1        500.2235015 MHz

F2 - Processing parameters
SI          65536
SF          500.2200086 MHz
WDW         EM
SSB         0
GB          0.30 Hz
PC          4.00

1D NMR plot parameters
CX          22.80 cm
CY          5.33 cm
F1P        14.000 ppm
F1          7003.08 Hz
F2P        -0.500 ppm
F2         -250.11 Hz
PPOCN      0.63596 ppm/cm
HZCN       318.12241 Hz/cm
  
```

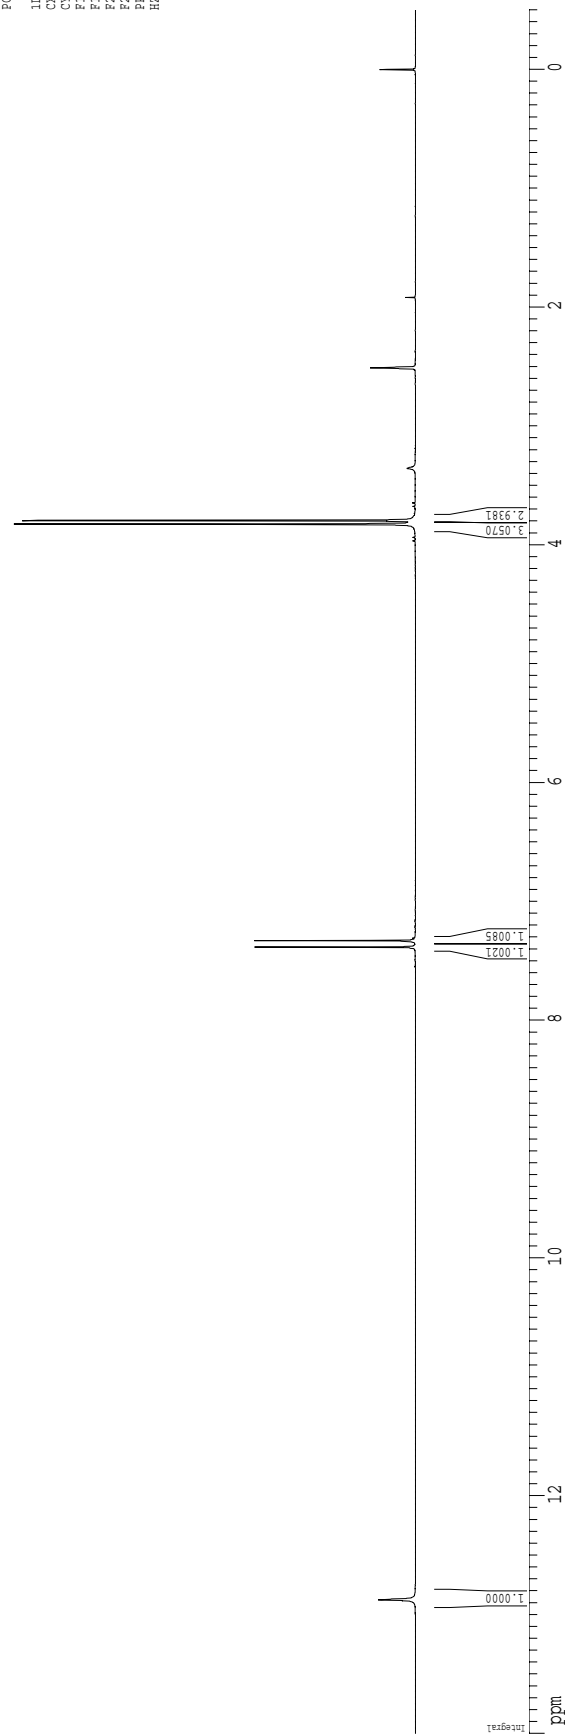

$^{13}\text{C}$  spectrum with  $^1\text{H}$  decoupling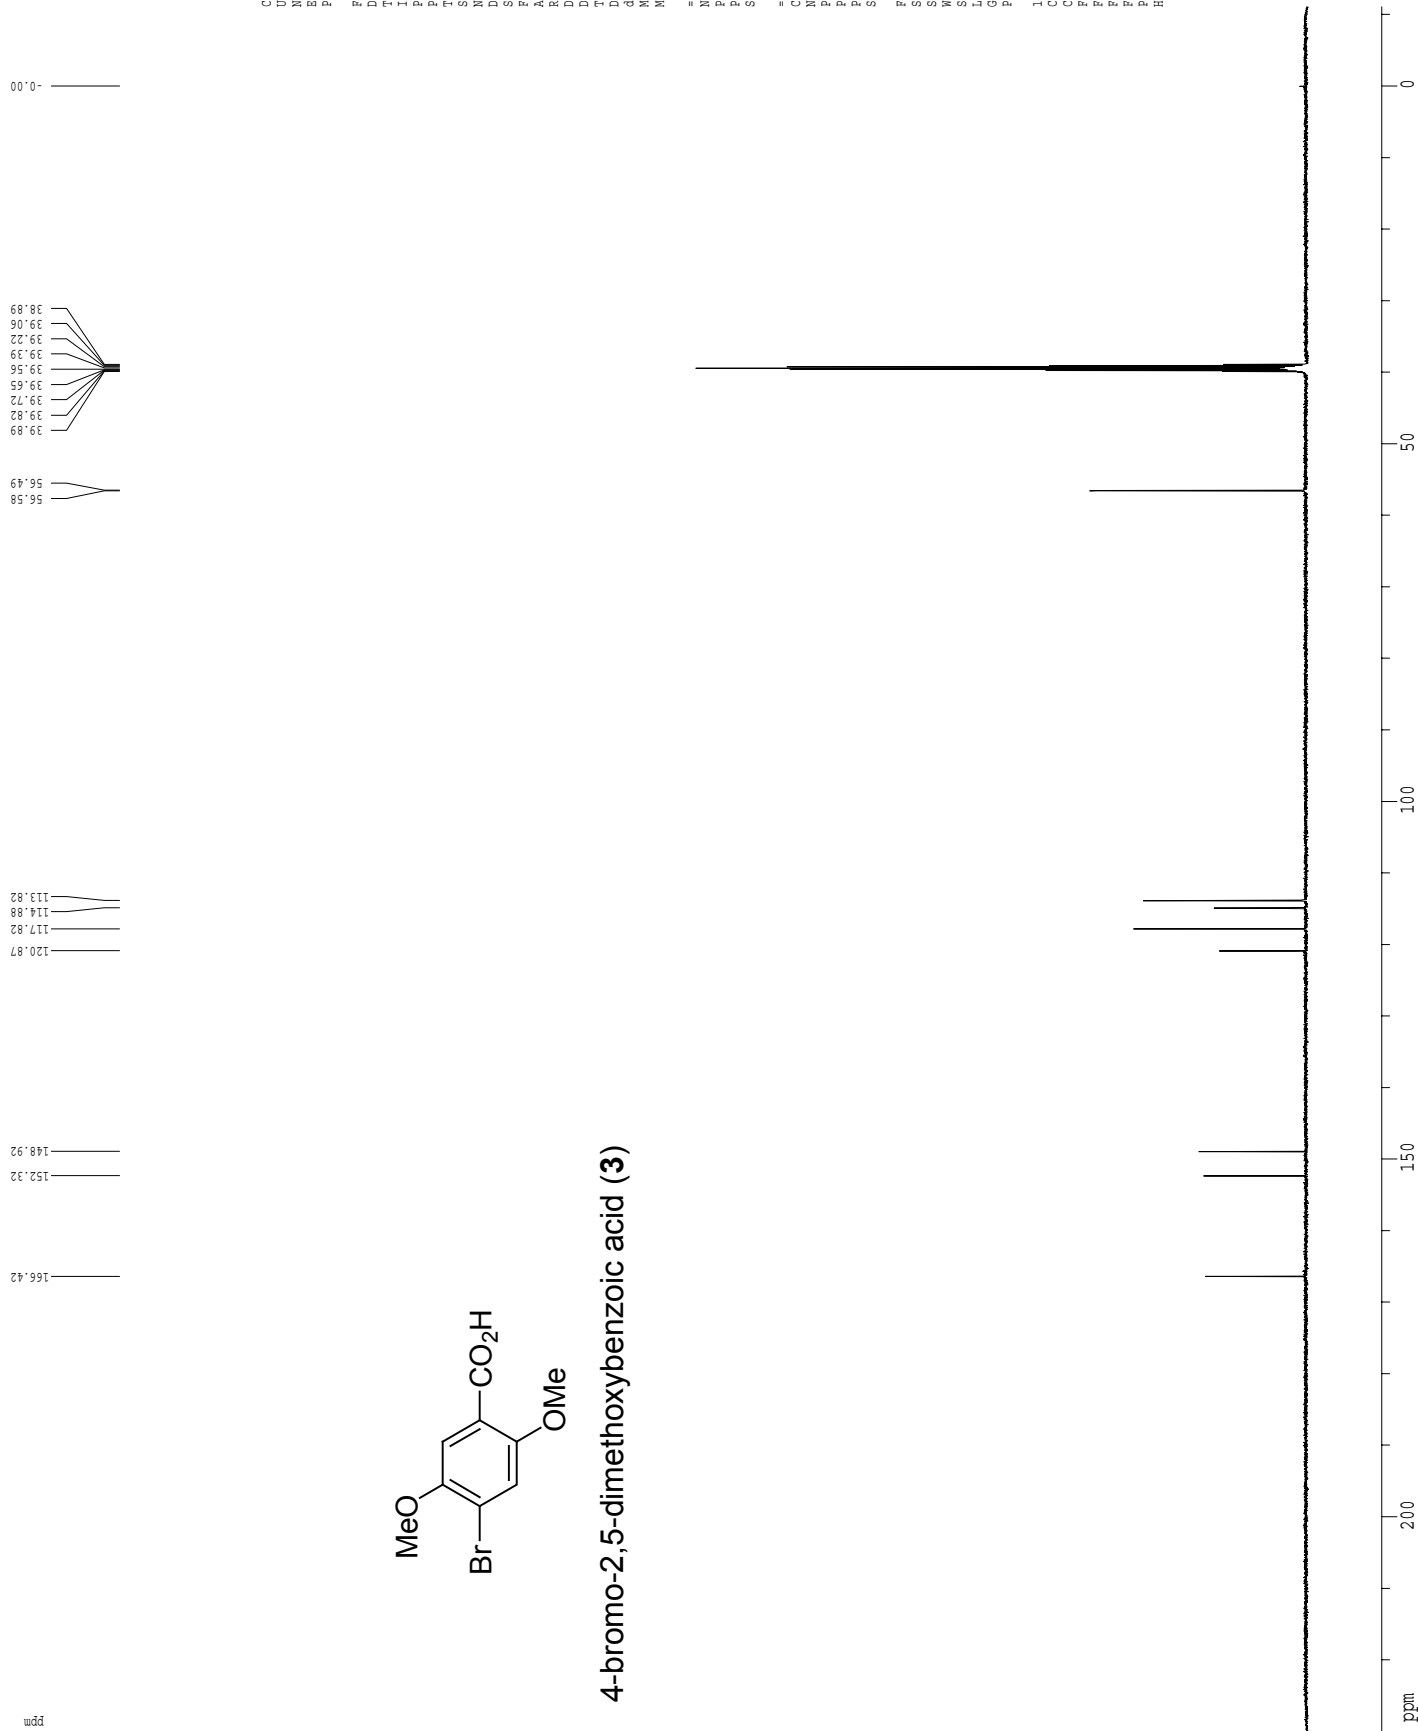

Current Data Parameters  
 USER cgotha  
 NAME 09-10-113  
 EXPNO 12  
 PROCNO 1

F2 - Acquisition Parameters  
 Date\_ 20060810  
 Time\_ 21.49  
 INSTRUM cryo500  
 PROBRD 5 mm CPTCI 1H-  
 PULPROG zgpg30  
 TD 65418  
 SOLVENT CDCl3  
 NS 166  
 DS 4  
 SWE 30303.031 Hz  
 FIDRES 0.463222 Hz  
 AQ 1.079470 sec  
 RG 5792.6  
 DW 16.500 usec  
 DE 8.00 usec  
 TE 300.2 K  
 D1 0.2500000 sec  
 d11 0.6300000 sec  
 ACQRES 0.6300000 sec  
 NUC1 13C  
 NUC2 1H  
 P1 15.00 usec  
 PL1 -1.00 dB  
 SFO1 125.762548 MHz

## 4-bromo-2,5-dimethoxybenzoic acid (3)



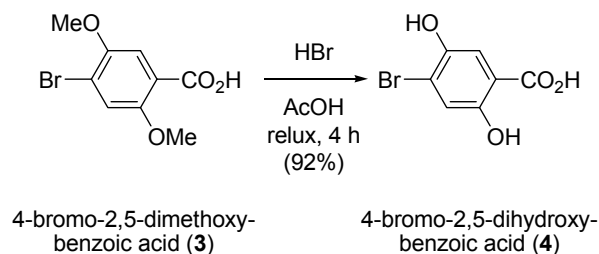

**4-Bromo-2,5-dihydroxybenzoic acid (4).** A solution of 4-bromo-2,5-dihydroxybenzoic acid (**3**) (6.75 g, 25.9 mmol), 48% aq HBr (130 mL) and acetic acid (30 mL) was heated at reflux for 4 h. The mixture was then concentrated by rotary evaporation to remove most of the acetic acid and then extracted with ether (3 × 200 mL). The organic layer was washed with 6 N HCl (200 mL) and then extracted with 2 M NaOH (3 × 50 mL). Acidification with concd HCl and filtration with water gave 4-bromo-2,5-dihydroxybenzoic acid (**4**) as a tan-colored solid (5.55 g, 92%): mp 229-230 °C; IR (KBr) 3700-2000 (br), 1690, 1611  $\text{cm}^{-1}$ ;  $^1\text{H}$  NMR, (500 MHz,  $\text{CD}_3\text{SOCD}_3$ , 298 K)  $\delta$  10.70 (br. s, 1 H), 9.95 (s, 1 H), 7.33 (s, 1 H), 7.14 (s, 1 H);  $^{13}\text{C}$  NMR (125 MHz,  $\text{CD}_3\text{SOCD}_3$ , 298 K)  $\delta$  171.0, 153.7, 146.5, 120.7, 117.4, 115.2, 112.5; HRMS (ESIMS)  $m/z$  for  $\text{C}_7\text{H}_4\text{BrO}_4$   $[\text{M}-\text{H}]^-$  calcd 230.9293, found 230.9283.

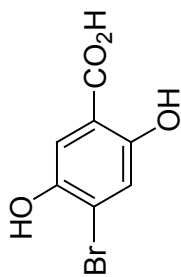4-bromo-2,5-dihydroxybenzoic acid (**4**)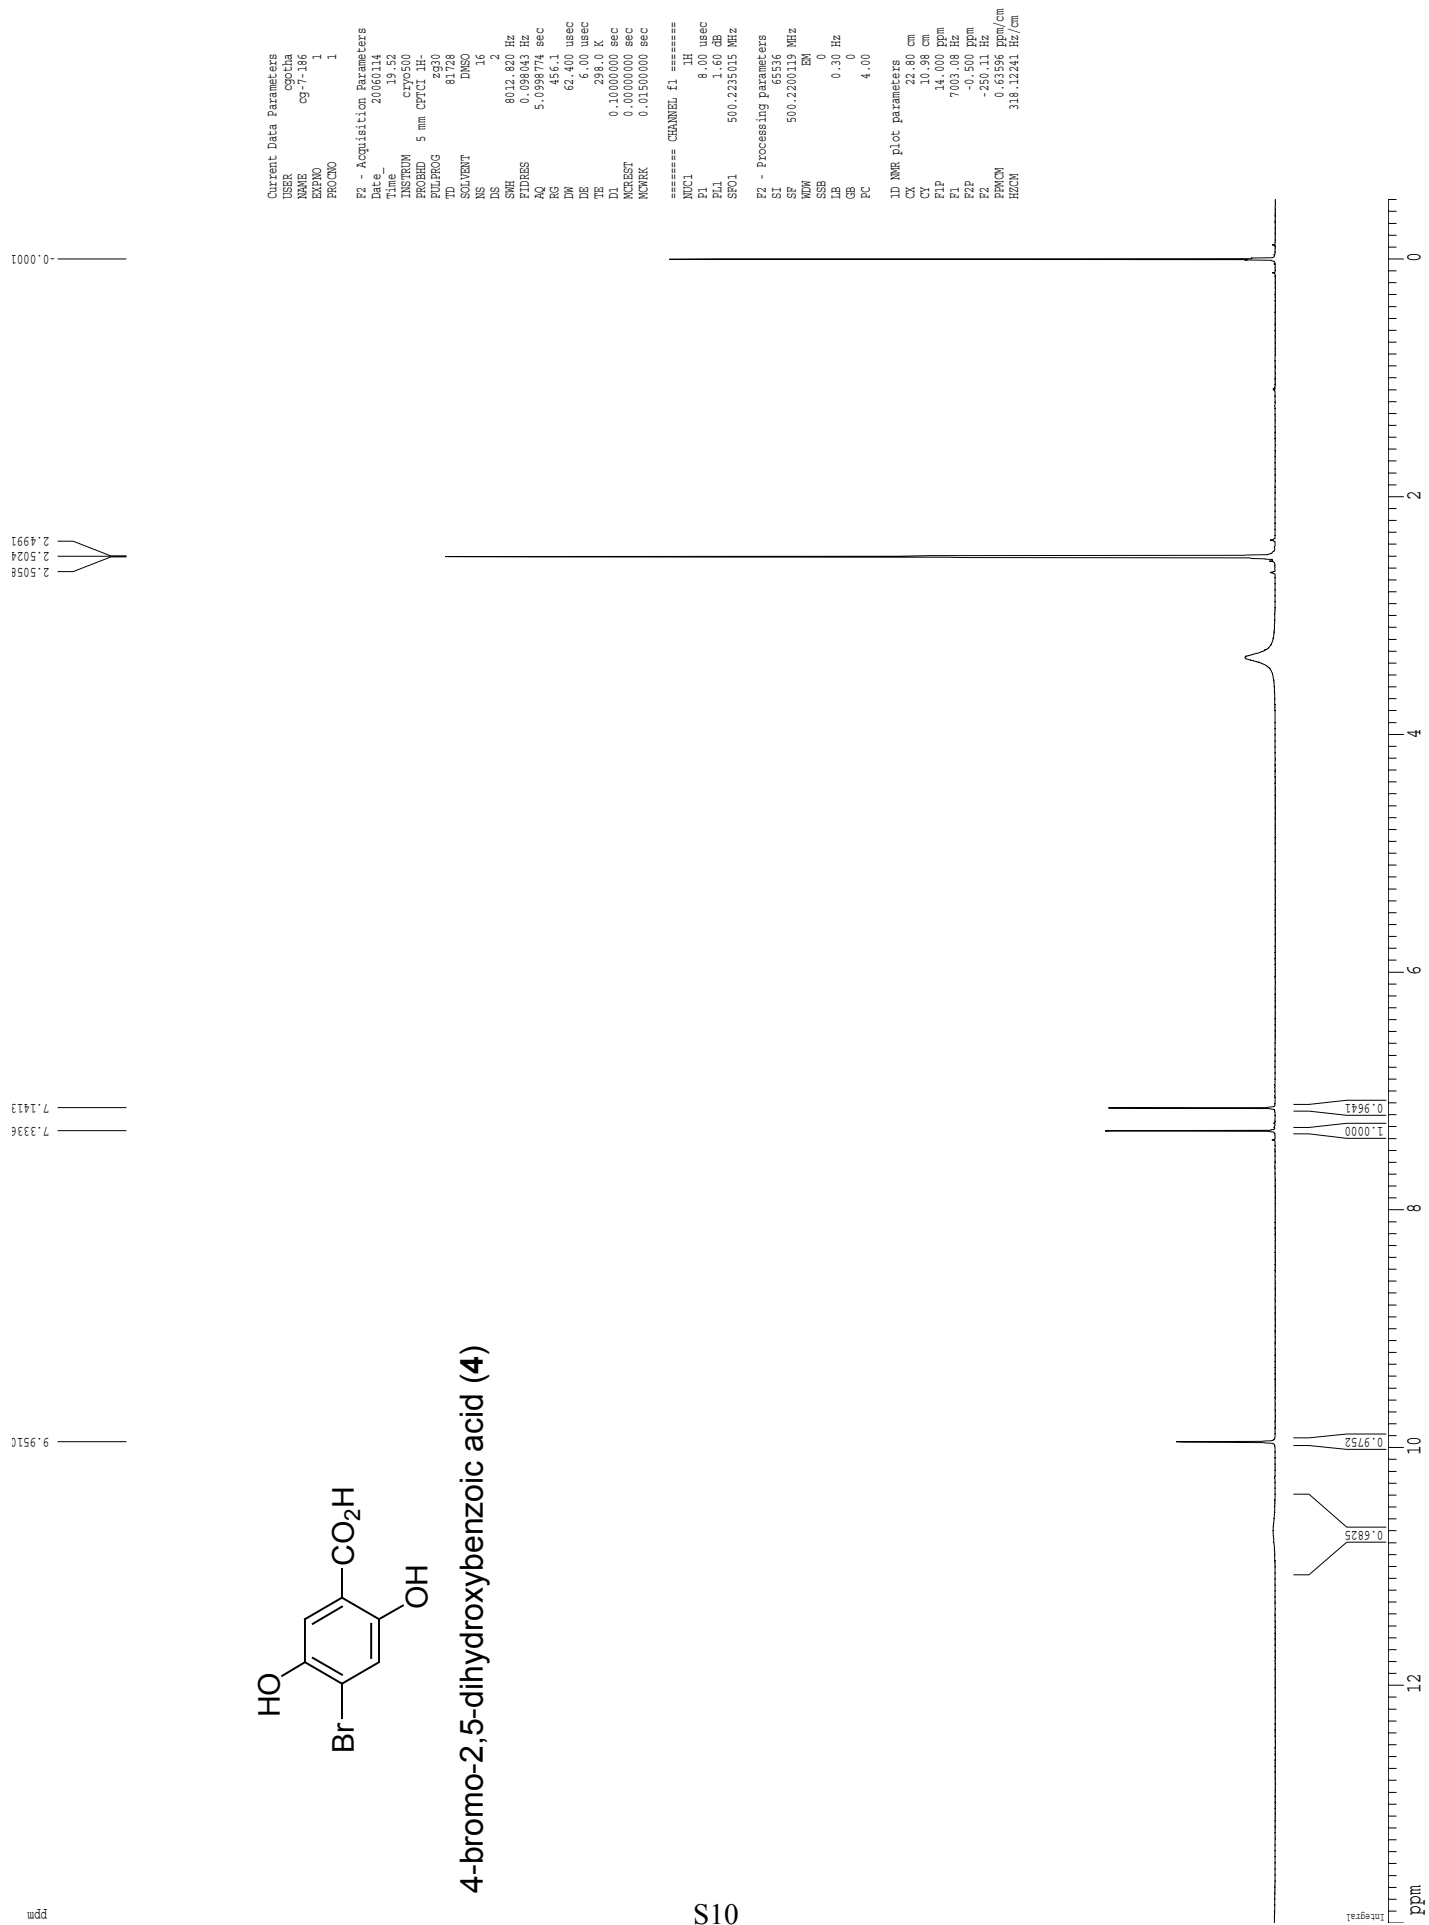

## 13C spectrum with 1H decoupling

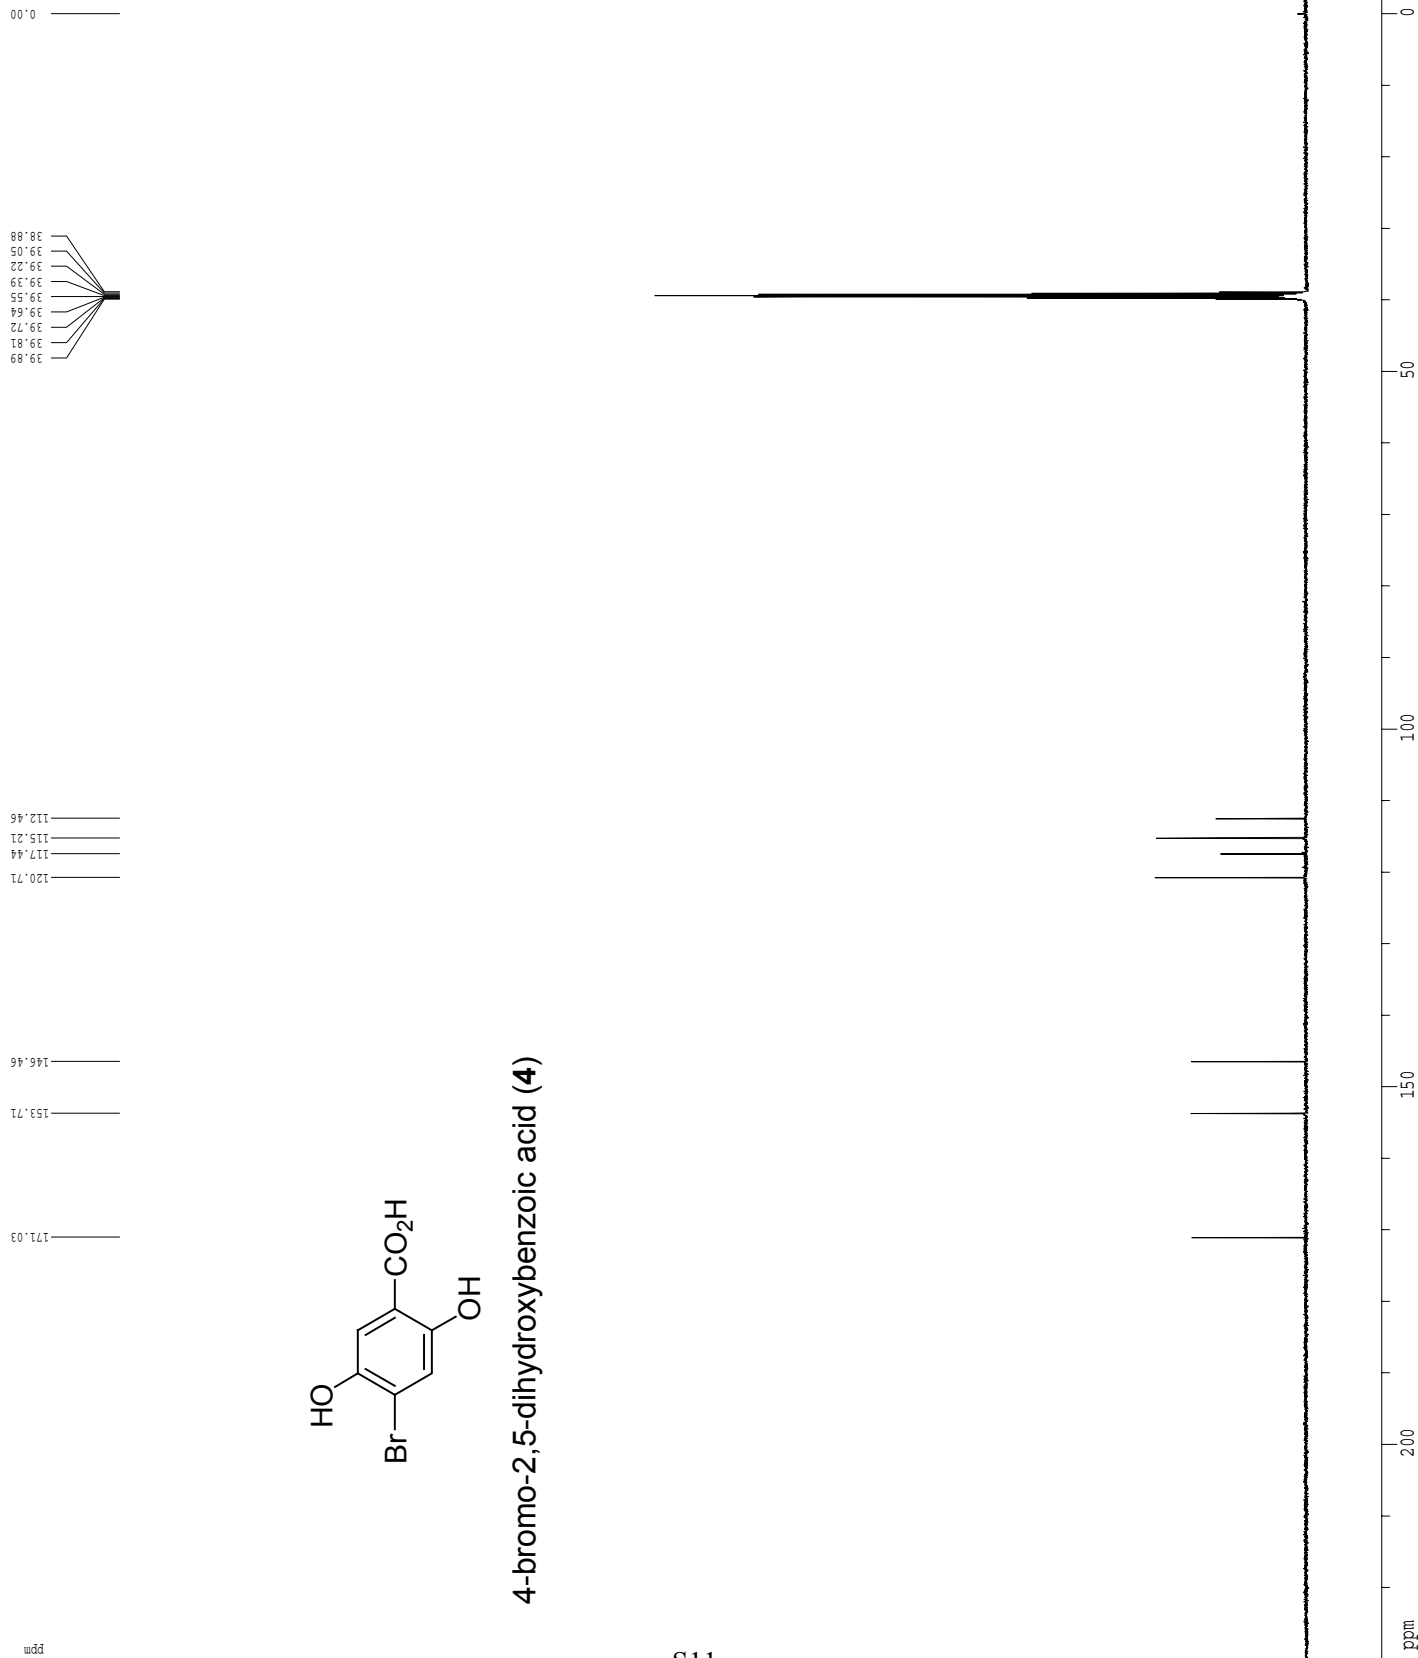

4-bromo-2,5-dihydroxybenzoic acid (4)

```

Current Data Parameters
USBR          cspdia
NAME          c9-10-158
PAPRO        4
PROCNO       1

F2 - Acquisition Parameters
Date_         20060903
Time_        22.16
INSTRUM      cryo500
PROBHD       5 mm CPTCI 1H-
PULPROG      zgpg30
TD           65418
SOLVENT      DMSO
NS           177
DS           4
SWH          30303.031 Hz
FIDRES       0.463222 Hz
AQ           1.0794635 sec
RG           6502
DM           16.500 usec
DE           6.00 usec
TE           29.62 K
D1           0.2500000 sec
d11          0.0300000 sec
NOFRES       0.0000000 sec
NOVERK       0.0150000 sec

===== CHANNEL F1 =====
NUC1         13C
P1           15.00 usec
PL1          -1.00 dB
SFO1         125.7942548 MHz

===== CHANNEL E2 =====
CPDPRG2      waltz16
NUC2         1H
PCPD2        100.00 usec
PL2          1.60 dB
PL12         21.54 dB
SFO2         500.2225011 MHz

F2 - Processing parameters
SI           65536
SF           125.7804923 MHz
WDW          EM
SSB          0
LB           1.00 Hz
GB           0
PC           2.00

1D NMR plot parameters
CX           22.80 cm
CY           8.63 cm
FIP          229.877 ppm
FL           28514.02 Hz
F2P          111.043 ppm
F3P          1382.01 Hz
RGACM        10.8665 ppm/cm
HZCM         1329.00332 Hz/cm

```

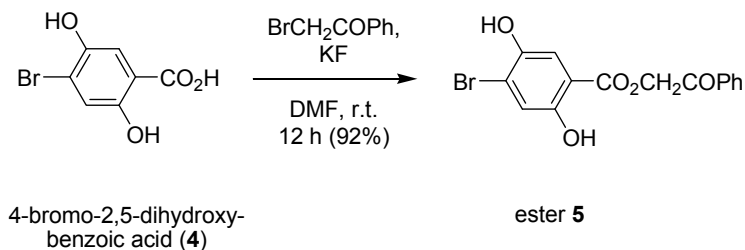

**Ester 5.** A solution of 4-bromo-2,5-dihydroxybenzoic acid (**4**) (4.21 g, 18.1 mmol), 2-bromoacetophenone (3.60 g, 18.1 mmol), potassium fluoride (2.31 g, 39.8 mmol), and DMF (100 mL) was stirred under an atmosphere of nitrogen for ca. 12 h at 25 °C. The reaction mixture was then partitioned between water (100 mL) and CH<sub>2</sub>Cl<sub>2</sub> (100 mL) and the organic layer was extracted with CH<sub>2</sub>Cl<sub>2</sub> (2 × 50 mL). The combined organic layers were washed with saturated aq sodium chloride (250 mL), dried (Na<sub>2</sub>SO<sub>4</sub>, 2 h), filtered, and concentrated by rotary evaporation to provide a yellow solid. The yellow solid was dissolved in CH<sub>2</sub>Cl<sub>2</sub> (20 mL) and ethyl acetate (20 mL), and precipitated with hexanes (100 mL) to provide ester **5** as an off-white solid (5.86 g, 92%): mp 184-186 °C; IR (KBr) 3408, 3061, 2920, 1721, 1692, 1616, 1592 cm<sup>-1</sup>; <sup>1</sup>H NMR, (500 MHz, CD<sub>3</sub>SOCD<sub>3</sub>, 298 K) δ 10.09 (s, 1 H), 9.80 (s, 1 H), 8.02 (d, *J* = 7.2 Hz, 2 H), 7.71 (t, *J* = 7.4 Hz, 1 H), 7.59 (t, *J* = 7.8 Hz, 2 H) 7.46 (s, 1 H), 7.22 (s, 1 H), 5.79 (s, 2 H); <sup>13</sup>C NMR (125 MHz, CD<sub>3</sub>SOCD<sub>3</sub>, 298 K) δ 192.3, 166.7, 152.3, 146.7, 134.1, 133.6, 128.9, 127.8, 121.3, 117.7, 115.3, 112.7, 67.3; HRMS (ESIMS) *m/z* for C<sub>15</sub>H<sub>11</sub>BrO<sub>5</sub>Na [M+Na]<sup>+</sup> calcd 372.9688, found 372.9675.

<sup>1</sup>H spectrum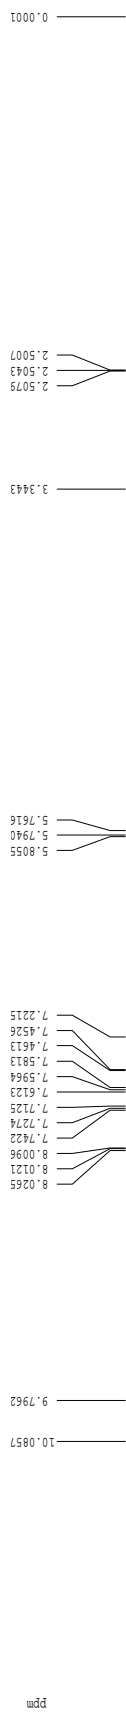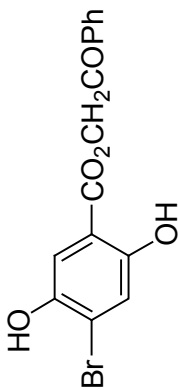

ester 5

```

Current Data Parameters
USER          cgocha
NAME         C9-10-160
PROCNO       1
PRCNO        1
=====
F2 - Acquisition Parameters
Date_        20060904
Time_        0.09
INSTRUM     crys500
PROBHD      5 mm CPTCI 1H-
PULPROG     zg30
TD           81728
SOLVENT     DMSO
NS           8
DS           2
AQ           0.312820 Hz
RG           0.636843 Hz
EXRES       5.0398774 sec
RG           5.7
DM           62.400 usec
DE           6.00 usec
TE           298.0 K
D1           0.10000000 sec
MCOREST     0.00000000 sec
MORRK       0.01500000 sec
===== CHANNEL f1 =====
NUC1         1H
P1           8.00 usec
PL1          0 dB
SFO1         500.2335013 MHz
=====
F2 - Processing parameters
SI           65536
SF           500.2200108 MHz
WDW          EM
SSB          0
LB           0.30 Hz
GB           0
PC           4.00
=====
1D NMR plot parameters
CX           22.80 cm
CY           3.00 cm
CZ           12.000 cm
F1P          6002.64 Hz
F2P          -0.200 ppm
P2           -100.04 Hz
PPMCM       0.53309 ppm/cm
HZXCM       267.66159 Hz/cm

```

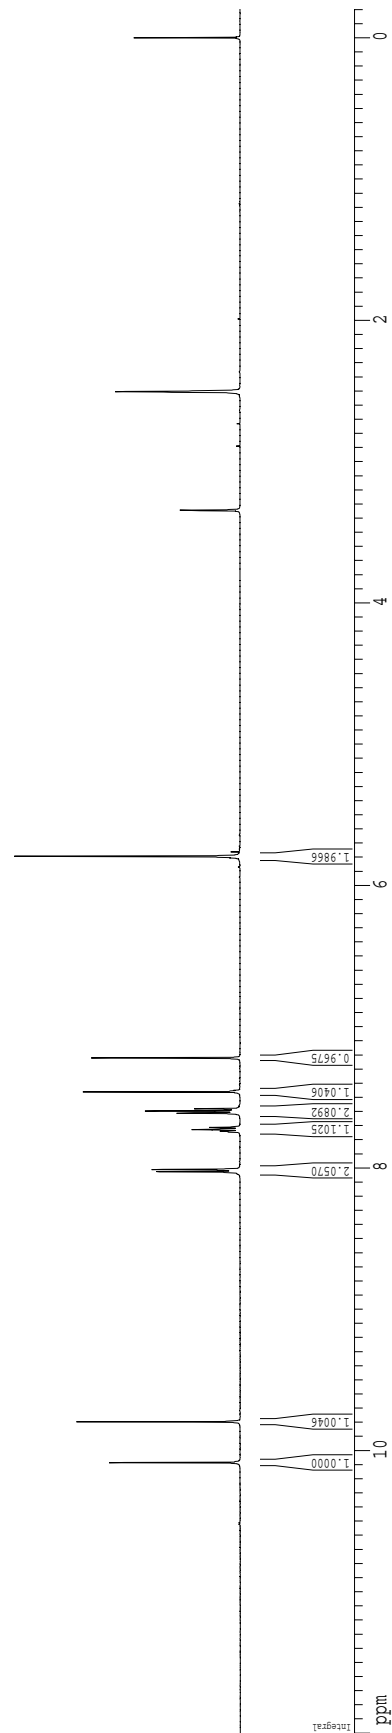

## 13C spectrum with 1H decoupling

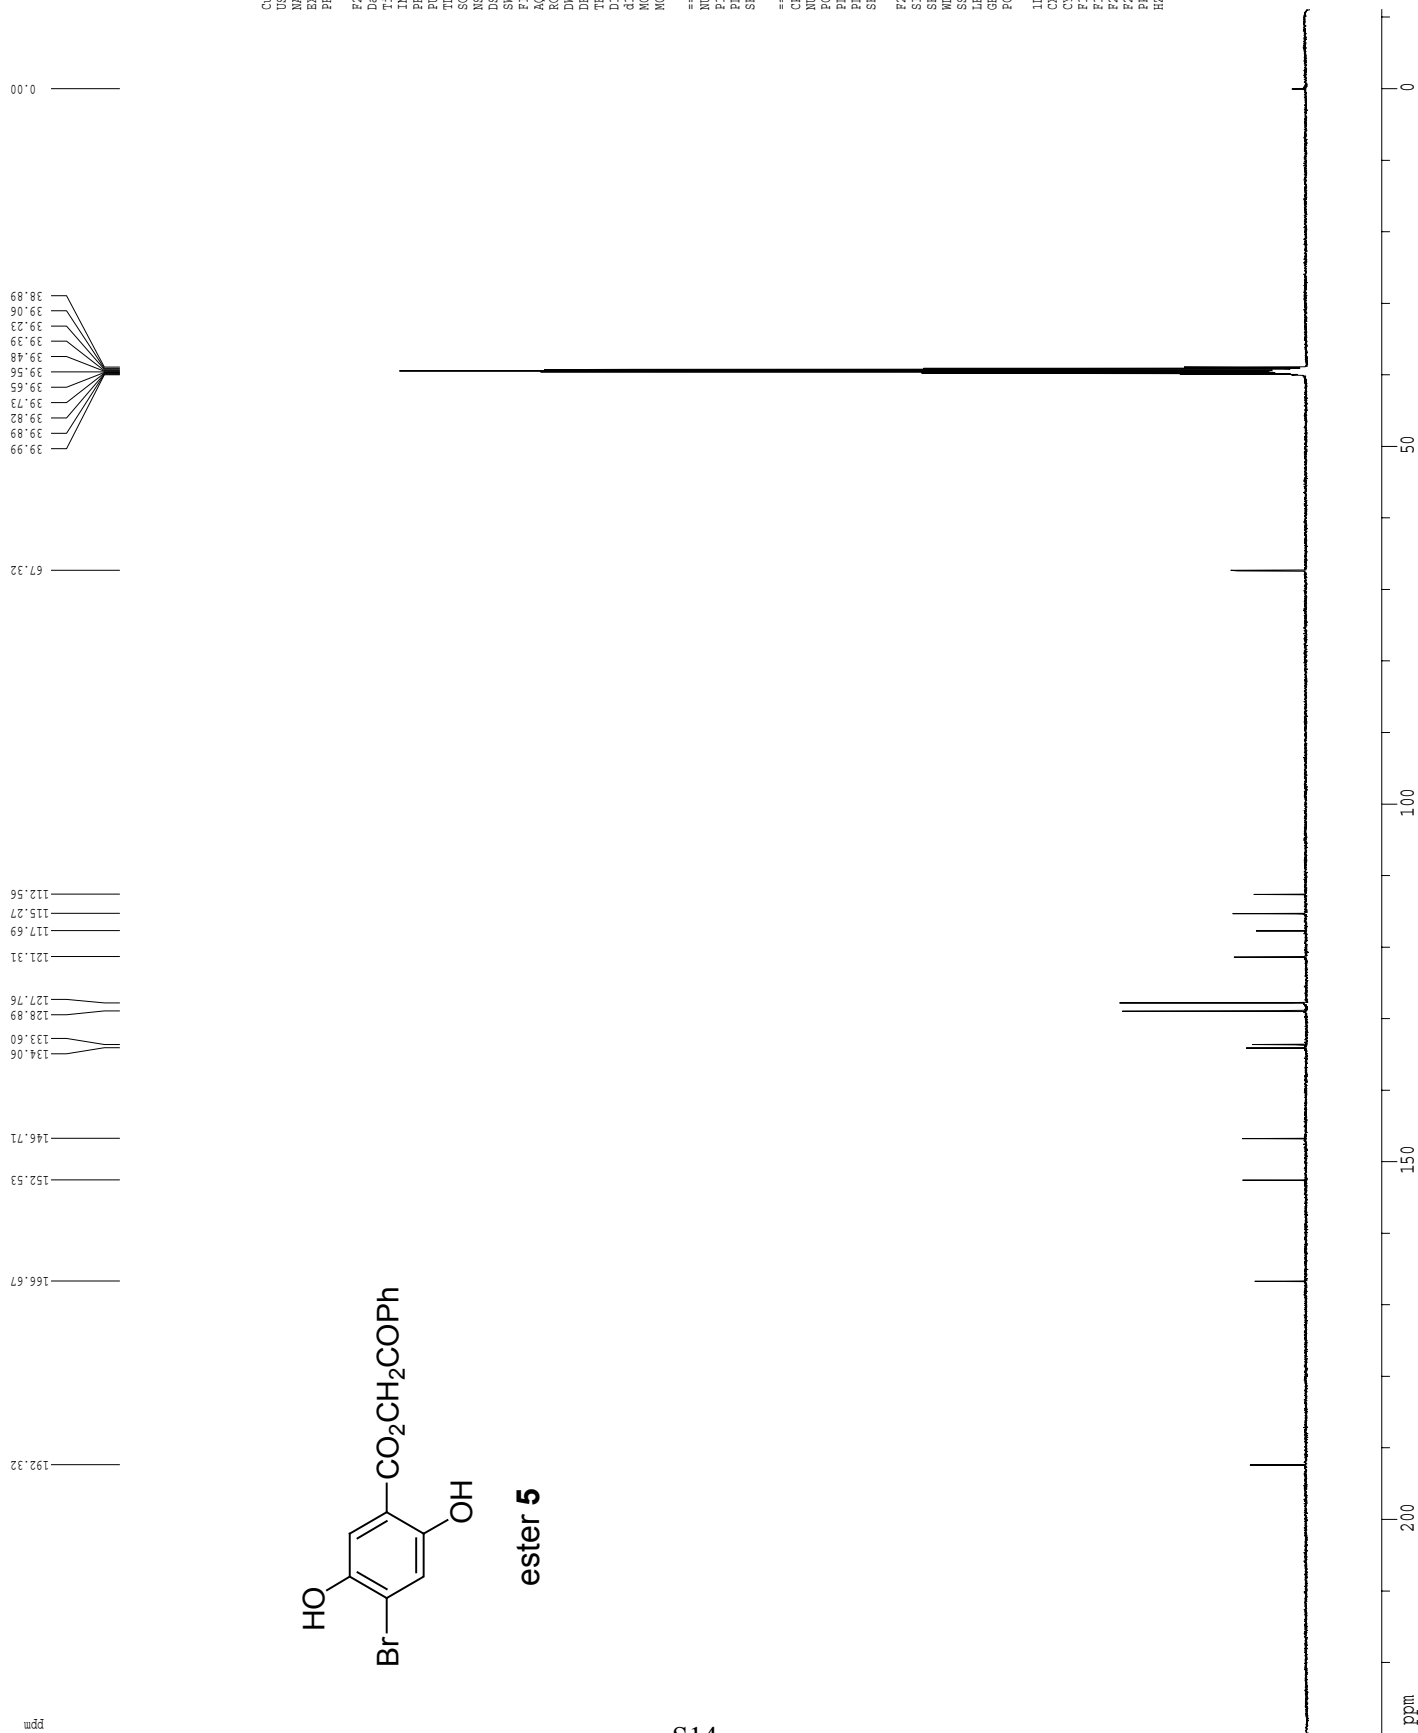

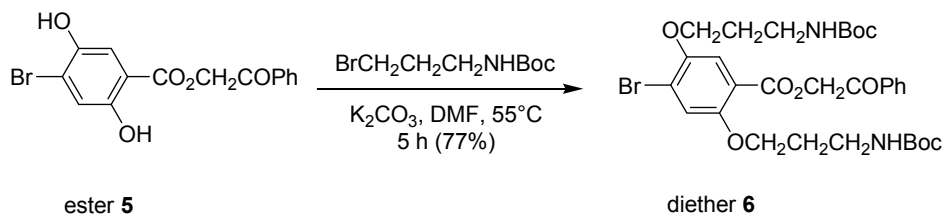

**Diether 6.** A solution of ester **5** (2.21 g, 6.29 mmol), *t*-butyl-3-bromopropylcarbamate<sup>2</sup> (5.24 g, 22.0 mmol), dry K<sub>2</sub>CO<sub>3</sub> (5.22 g, 37.7 mmol), and DMF (100 mL) was stirred at 50 °C for 5 h under an atmosphere of nitrogen. Saturated aq sodium chloride (ca. 100 mL) was then added to the mixture and the solution was extracted with CH<sub>2</sub>Cl<sub>2</sub> (3 × 40 mL). The organic layer was dried over Na<sub>2</sub>SO<sub>4</sub>, filtered, and concentrated by rotary evaporation to give a yellow solid. The yellow solid was dissolved in warm ethyl acetate (ca. 50 mL), precipitated with hexanes (ca. 100 mL), and the resultant solid was filtered to provide diether **6** as a white powder (3.22 g, 77%): mp 159-161 °C; IR (KBr) 3356, 2984, 2937, 2877, 1740, 1674, 1524 cm<sup>-1</sup>; <sup>1</sup>H NMR, (500 MHz, CD<sub>3</sub>SOCD<sub>3</sub>, 298 K) δ 8.02 (d, *J* = 7.2 Hz, 2 H), 7.72 (t, *J* = 7.4 Hz, 1 H), 7.59 (t, *J* = 7.8 Hz, 2 H), 7.45 (d, *J* = 10.4 Hz, 2 H), 6.90 (t, *J* = 5.3 Hz, 1 H), 6.83 (t, *J* = 5.4 Hz, 1 H), 5.71 (s, 2 H), 4.04 (appar. t, *J* = 5.4 Hz, 4 H), 3.15-3.08 (m, 4 H), 1.87 (quintet, *J* = 6.5 Hz, 2 H), 1.79 (quintet, *J* = 6.4 Hz, 2 H), 1.37 (s, 9 H), 1.33 (s, 9 H); <sup>13</sup>C NMR (125 MHz, CD<sub>3</sub>SOCD<sub>3</sub>, 298 K) δ 192.6, 164.0, 155.5, 152.6, 148.6, 133.87, 133.86, 128.8, 127.7, 119.5, 119.0, 117.1, 115.3, 77.4, 77.3, 67.6, 67.3, 67.0, 36.9, 36.8, 29.1, 28.2, 28.1; HRMS (ESIMS) *m/z* for C<sub>31</sub>H<sub>41</sub>BrN<sub>2</sub>O<sub>9</sub>Na [M+Na]<sup>+</sup> calcd 687.1893, found 687.1873.

<sup>2</sup> Zych, A. J.; Iverson, B. L. *J. Am. Chem. Soc.* **2000**, *122*, 8898-8909.

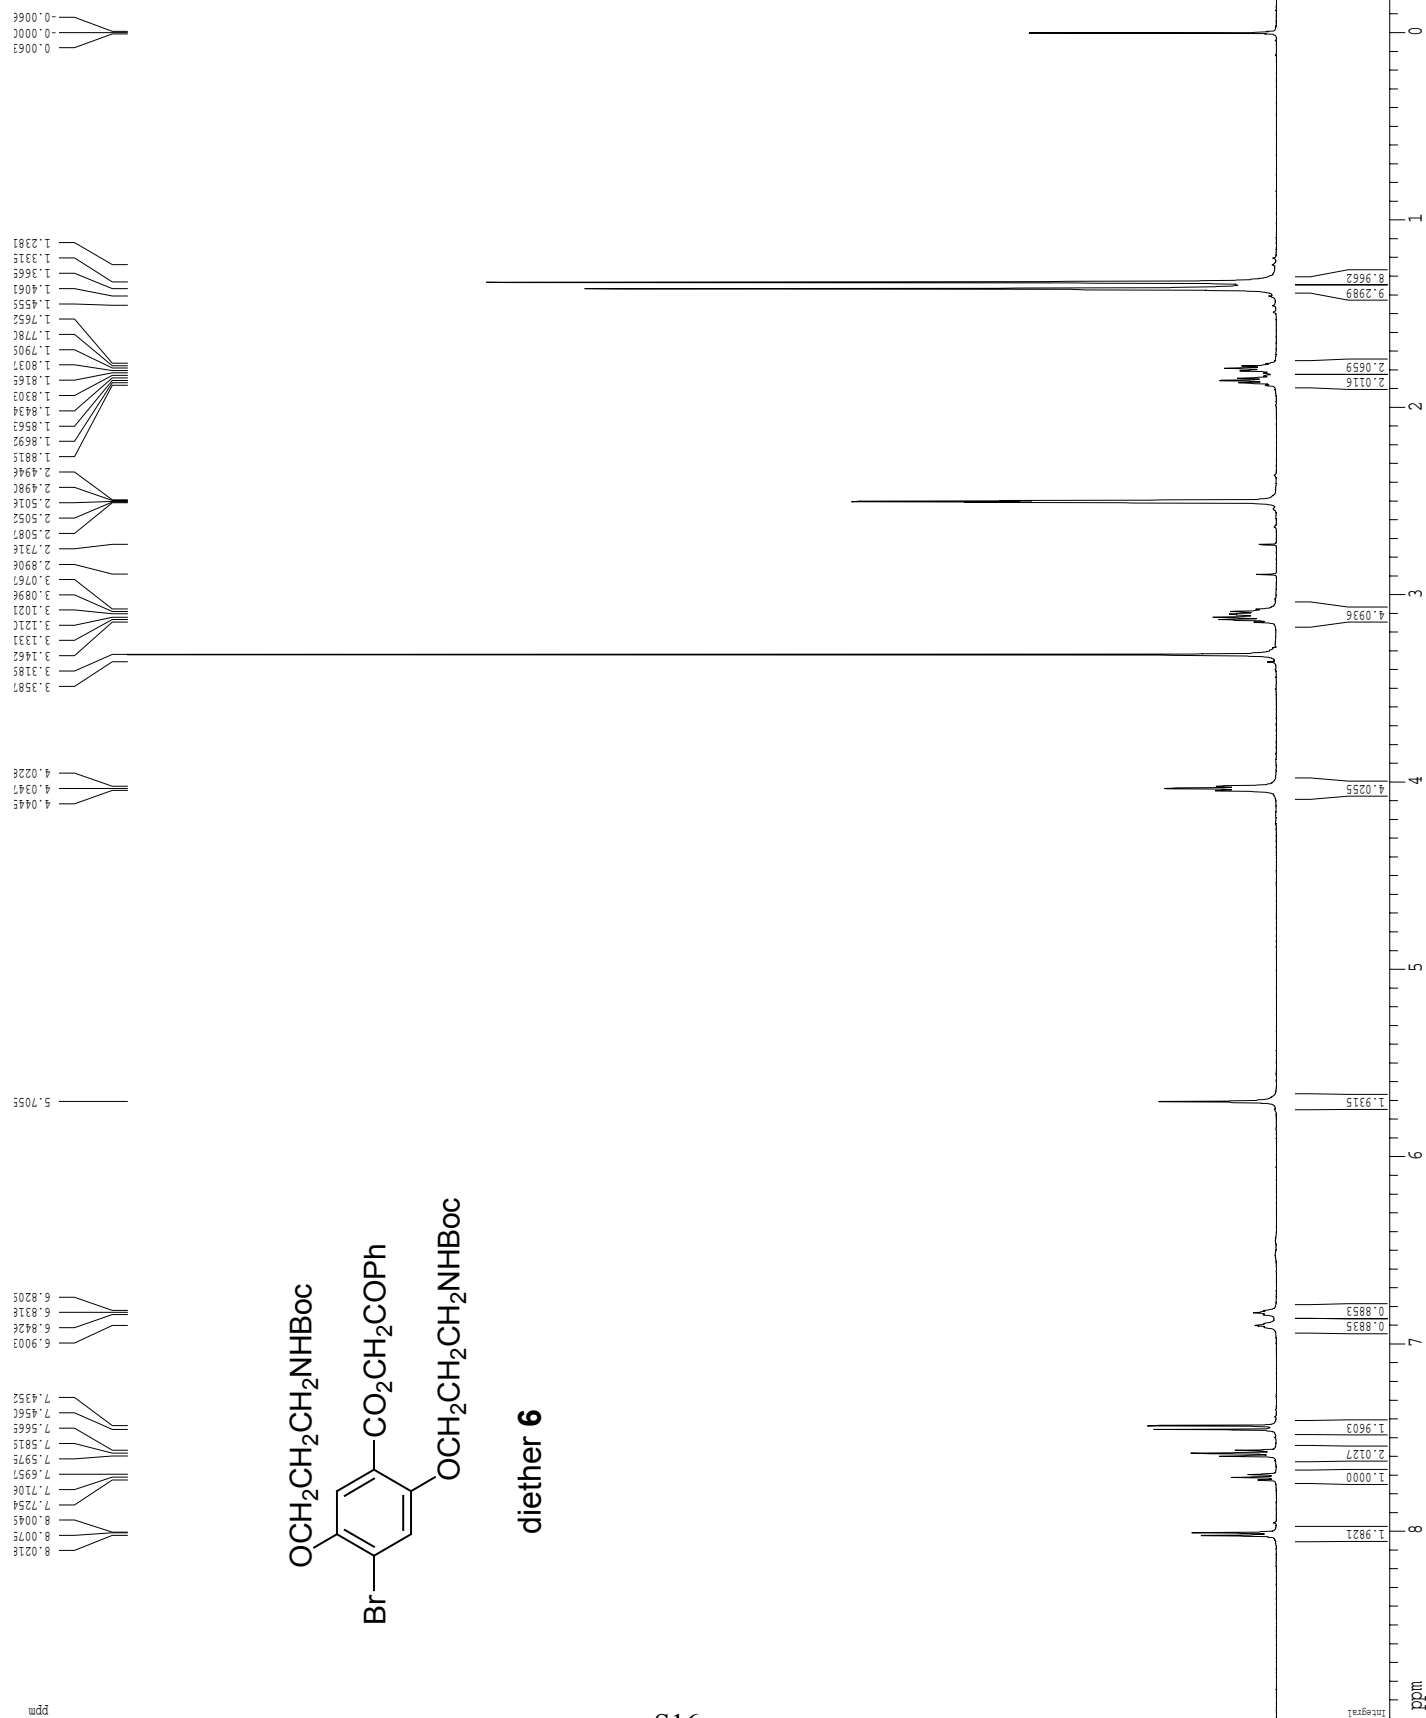





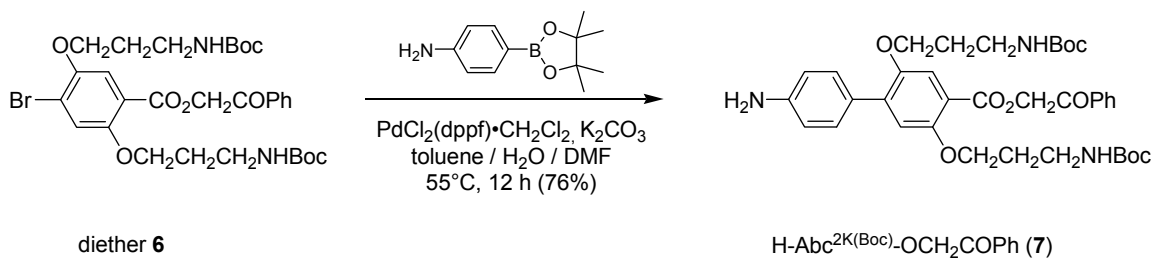

**H-Abc<sup>2K(Boc)</sup>-OCH<sub>2</sub>COPh (7)**. Diether **6** (7.55 g, 11.5 mmol), 4-(4,4,5,5-tetramethyl-1,3,2-dioxaborolan-2-yl)aniline (2.52 g, 11.5 mmol), PdCl<sub>2</sub>(dppf)•CH<sub>2</sub>Cl<sub>2</sub><sup>3</sup> (0.38 g, 0.46 mmol), K<sub>2</sub>CO<sub>3</sub> (7.95 g, 57.6 mmol) were dissolved in a mixture of toluene (245 mL), water (70 mL), and DMF (35 mL) and was stirred at 55 °C for ca. 12 h under an atmosphere of nitrogen. The suspension was then concentrated by rotary evaporation to remove most of the toluene and then diluted with CH<sub>2</sub>Cl<sub>2</sub> (250 mL). The organic layer was washed with water (ca. 250 mL), saturated aq sodium chloride (ca. 250 mL), and dried (Na<sub>2</sub>SO<sub>4</sub>). After filtration and concentration by rotary evaporation, a brown oil was obtained and was purified using column chromatography (silica gel, ethyl acetate–hexanes, 2/1, v/v) to provide H-Abc<sup>2K(Boc)</sup>-OCH<sub>2</sub>COPh (**7**) as an off-white solid (6.55 g, 84%): mp 149-151 °C; IR (KBr) 3477, 3366, 2974, 2930, 2874, 1736, 1681 cm<sup>-1</sup>; <sup>1</sup>H NMR, (500 MHz, CD<sub>3</sub>SOCD<sub>3</sub>, 298 K) δ 8.03 (d, *J* = 7.0 Hz, 2 H), 7.71 (t, *J* = 7.3 Hz, 1 H), 7.59 (t, *J* = 7.8 Hz, 2 H), 7.43 (s, 1 H), 7.35 (d, *J* = 8.5 Hz, 2 H), 7.02 (s, 1 H), 6.88 (t, *J* = 5.3 Hz, 1 H), 6.83 (t, *J* = 5.5 Hz, 1 H), 6.63 (d, *J* = 8.5 Hz, 2 H), 5.69 (s, 2 H), 5.30 (s, 2 H), 4.06 (t, *J* = 6.0 Hz, 2 H), 3.92 (t, *J* = 6 Hz, 2 H), 3.12 (q, *J* = 6.3 Hz, 2 H), 3.07 (q, *J* = 6.2 Hz, 2 H), 1.83-1.77 (m, 4 H), 1.37 (s, 9 H), 1.33 (s, 9 H); <sup>13</sup>C NMR (125 MHz, CD<sub>3</sub>SOCD<sub>3</sub>, 298 K) δ 192.9, 164.3, 155.5, 153.0, 148.8, 148.5, 136.6, 134.0,

<sup>3</sup> Hayashi, T.; Konishi, M.; Kobori, Y.; Kumada, M.; Higuchi, T.; Hirotsu, K. *J. Am. Chem. Soc.* **1984**, *106*, 158-163.

133.8, 130.0, 128.8, 127.7, 123.8, 116.4, 115.9, 115.3, 113.2, 77.4, 77.3, 67.2, 66.7, 66.2, 37.1, 36.8, 29.3, 29.2, 28.2, 28.1; HRMS (ESIMS)  $m/z$  for  $C_{37}H_{47}N_3O_9Na$   $[M+Na]^+$  calcd 700.3210, found 700.3205.





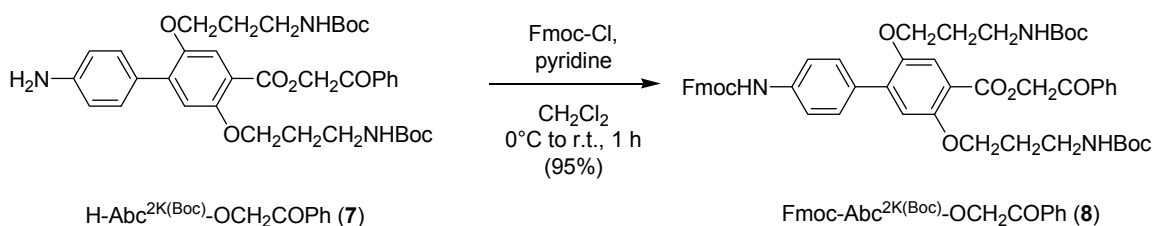

**Fmoc-Abc<sup>2K(Boc)</sup>-OCH<sub>2</sub>COPh (8)**. A solution of H-Abc<sup>2K(Boc)</sup>-OCH<sub>2</sub>COPh (7) (6.55 g, 9.66 mmol), pyridine (0.95 mL, 11.6 mmol), and CH<sub>2</sub>Cl<sub>2</sub> (200 mL) was cooled to 0 °C in an ice-bath. Fmoc-Cl (2.75 g, 10.6 mmol) in CH<sub>2</sub>Cl<sub>2</sub> (50 mL) was added in drops over 5 min. After 30 min, the solution was allowed to warm to 25 °C and stirred for an additional 30 min. The mixture was then washed with water (100 mL), dried (Na<sub>2</sub>SO<sub>4</sub>), filtered, and the filtrate was concentrated by rotary evaporation to give a yellow oil. The yellow oil was dissolved in CH<sub>2</sub>Cl<sub>2</sub> (ca. 15 mL), precipitated using ethyl acetate (ca. 50 mL) and hexanes (ca. 100 mL), and filtered to provide Fmoc-Abc<sup>2K(Boc)</sup>-OCH<sub>2</sub>COPh (8) as a white solid (8.82 g, 95%): mp 108-110 °C; IR (KBr) 3349, 2980, 2935, 2873, 1732, 1698, 1596 cm<sup>-1</sup>; <sup>1</sup>H NMR, (500 MHz, CD<sub>3</sub>SOCD<sub>3</sub>, 358 K) δ 9.47 (s, 1 H), 7.99 (d, *J* = 8.5 Hz, 2 H), 7.87 (d, *J* = 7.5 Hz, 2 H), 7.74 (d, *J* = 7.5 Hz, 2 H), 7.67 (t, *J* = 7.4 Hz, 1 H), 7.56 (t, *J* = 7.7 Hz, 2 H), 7.50 (s, 4 H), 7.44 (s, 1 H), 7.42 (t, *J* = 7.4 Hz, 2 H), 7.34 (td, *J* = 7.4, 1.1 Hz, 2 H), 7.06 (s, 1 H), 6.37 (br. s, 2 H), 5.61 (s, 2 H), 4.51 (d, *J* = 6.6 Hz, 2 H), 4.32 (t, *J* = 6.6 Hz, 1 H), 4.08 (t, *J* = 6.2 Hz, 2 H), 3.94 (t, *J* = 6.3 Hz, 2 H), 3.13 (q, *J* = 6.4 Hz, 2 H), 3.04 (q, *J* = 6.4 Hz, 2 H), 1.85 (quintet, *J* = 6.5 Hz, 2 H), 1.78 (quintet, *J* = 6.5 Hz, 2 H), 1.36 (s, 9 H), 1.34 (s, 9 H); <sup>13</sup>C NMR (125 MHz, CD<sub>3</sub>SOCD<sub>3</sub>, 298 K) δ 192.8, 164.3, 155.53, 155.51, 153.3, 152.7, 148.8, 143.7, 140.7, 138.6, 135.2, 133.90, 133.85, 130.8, 129.7, 128.8, 127.7, 127.6, 127.0, 125.0, 120.1, 117.7, 117.6,

116.5, 115.0, 77.4, 77.3, 67.2, 66.8, 66.1, 65.5, 46.5, 37.0, 36.6, 29.2, 29.1, 28.1, 28.0;

HRMS (ESIMS)  $m/z$  for  $C_{52}H_{57}N_3O_{11}Na$   $[M+Na]^+$  calcd 922.3891, found 922.3874.

$T = 358 \text{ K}$ 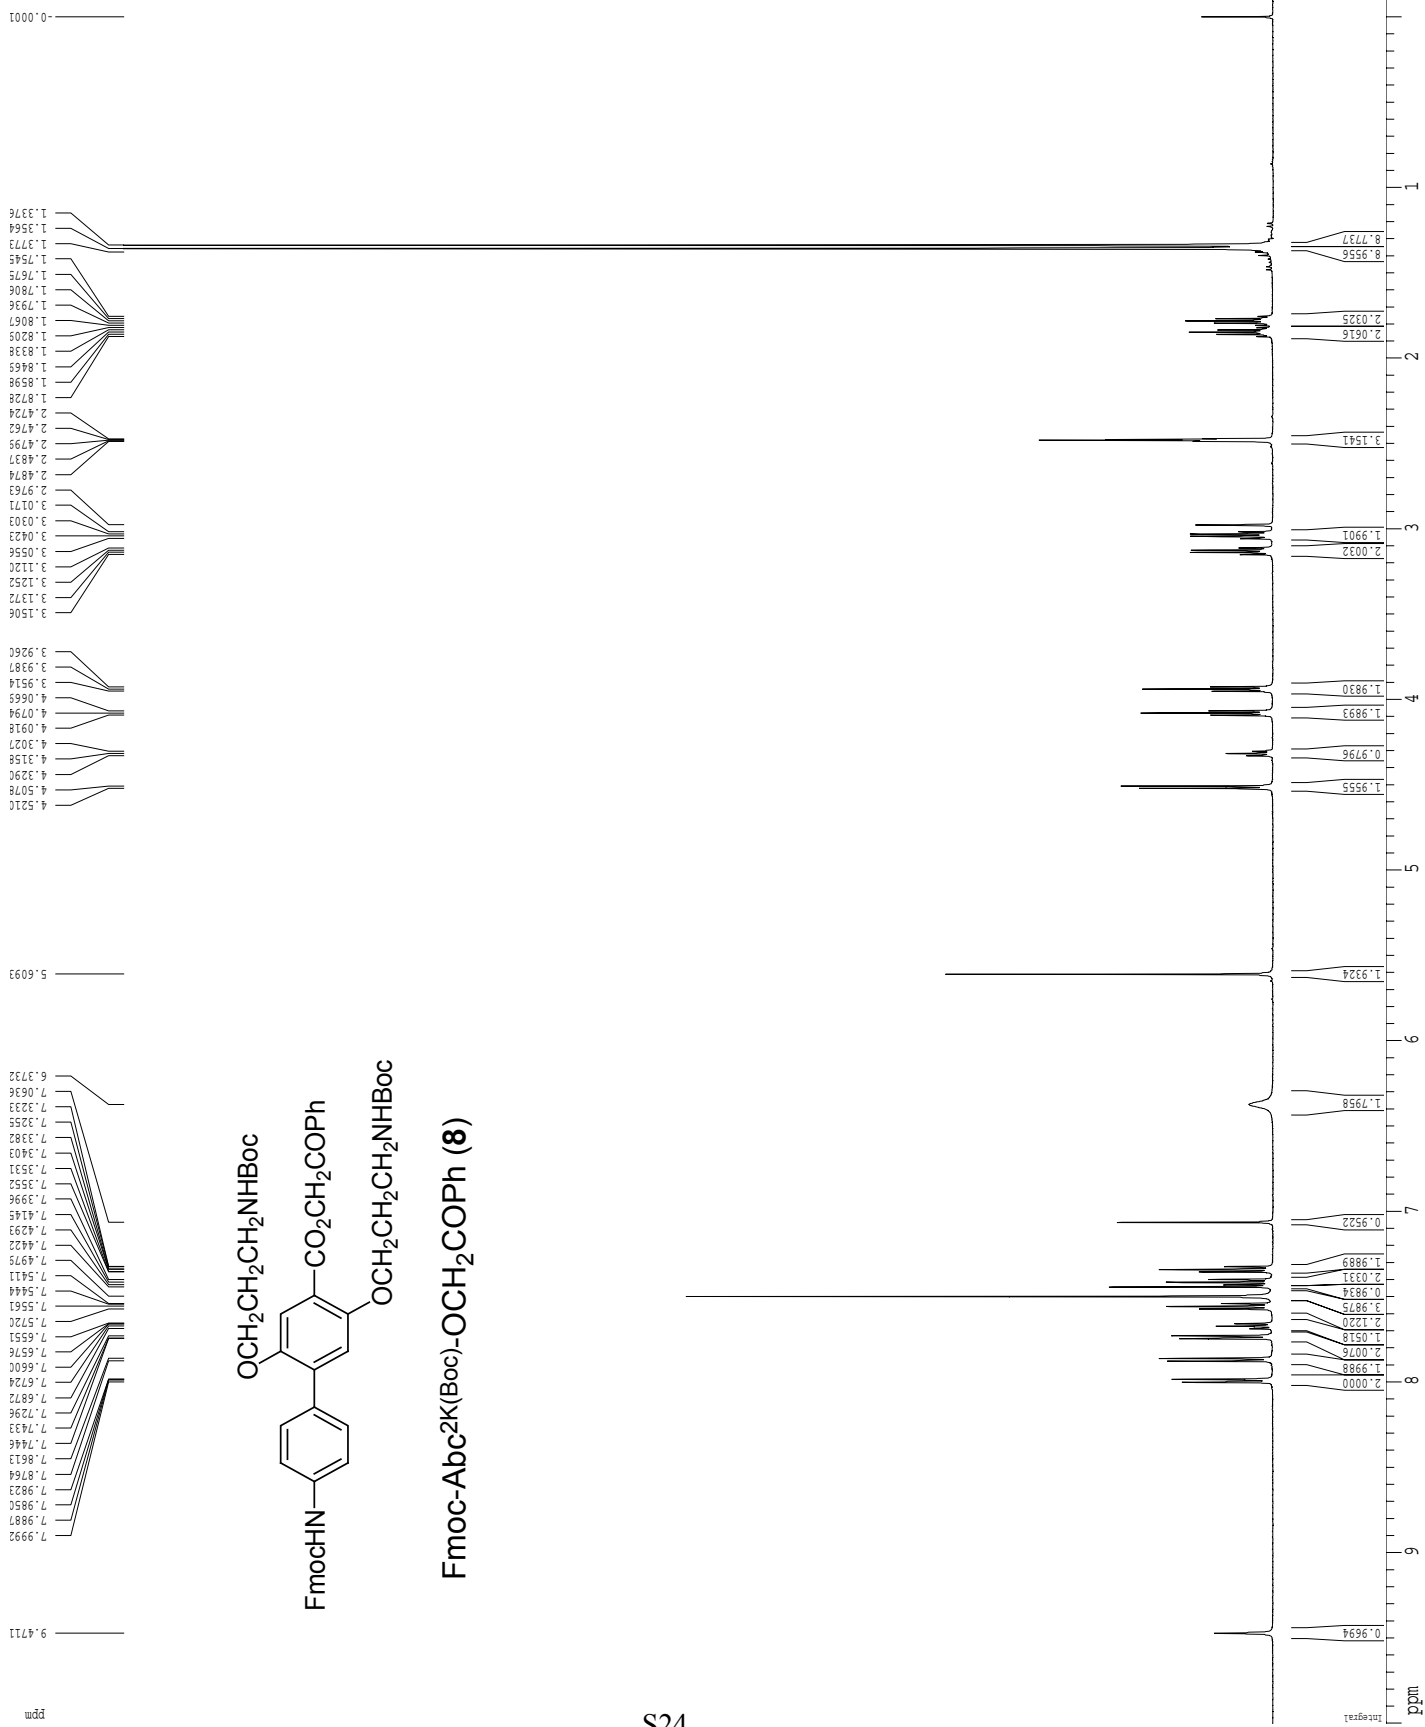



## 13C spectrum with 1H decoupling

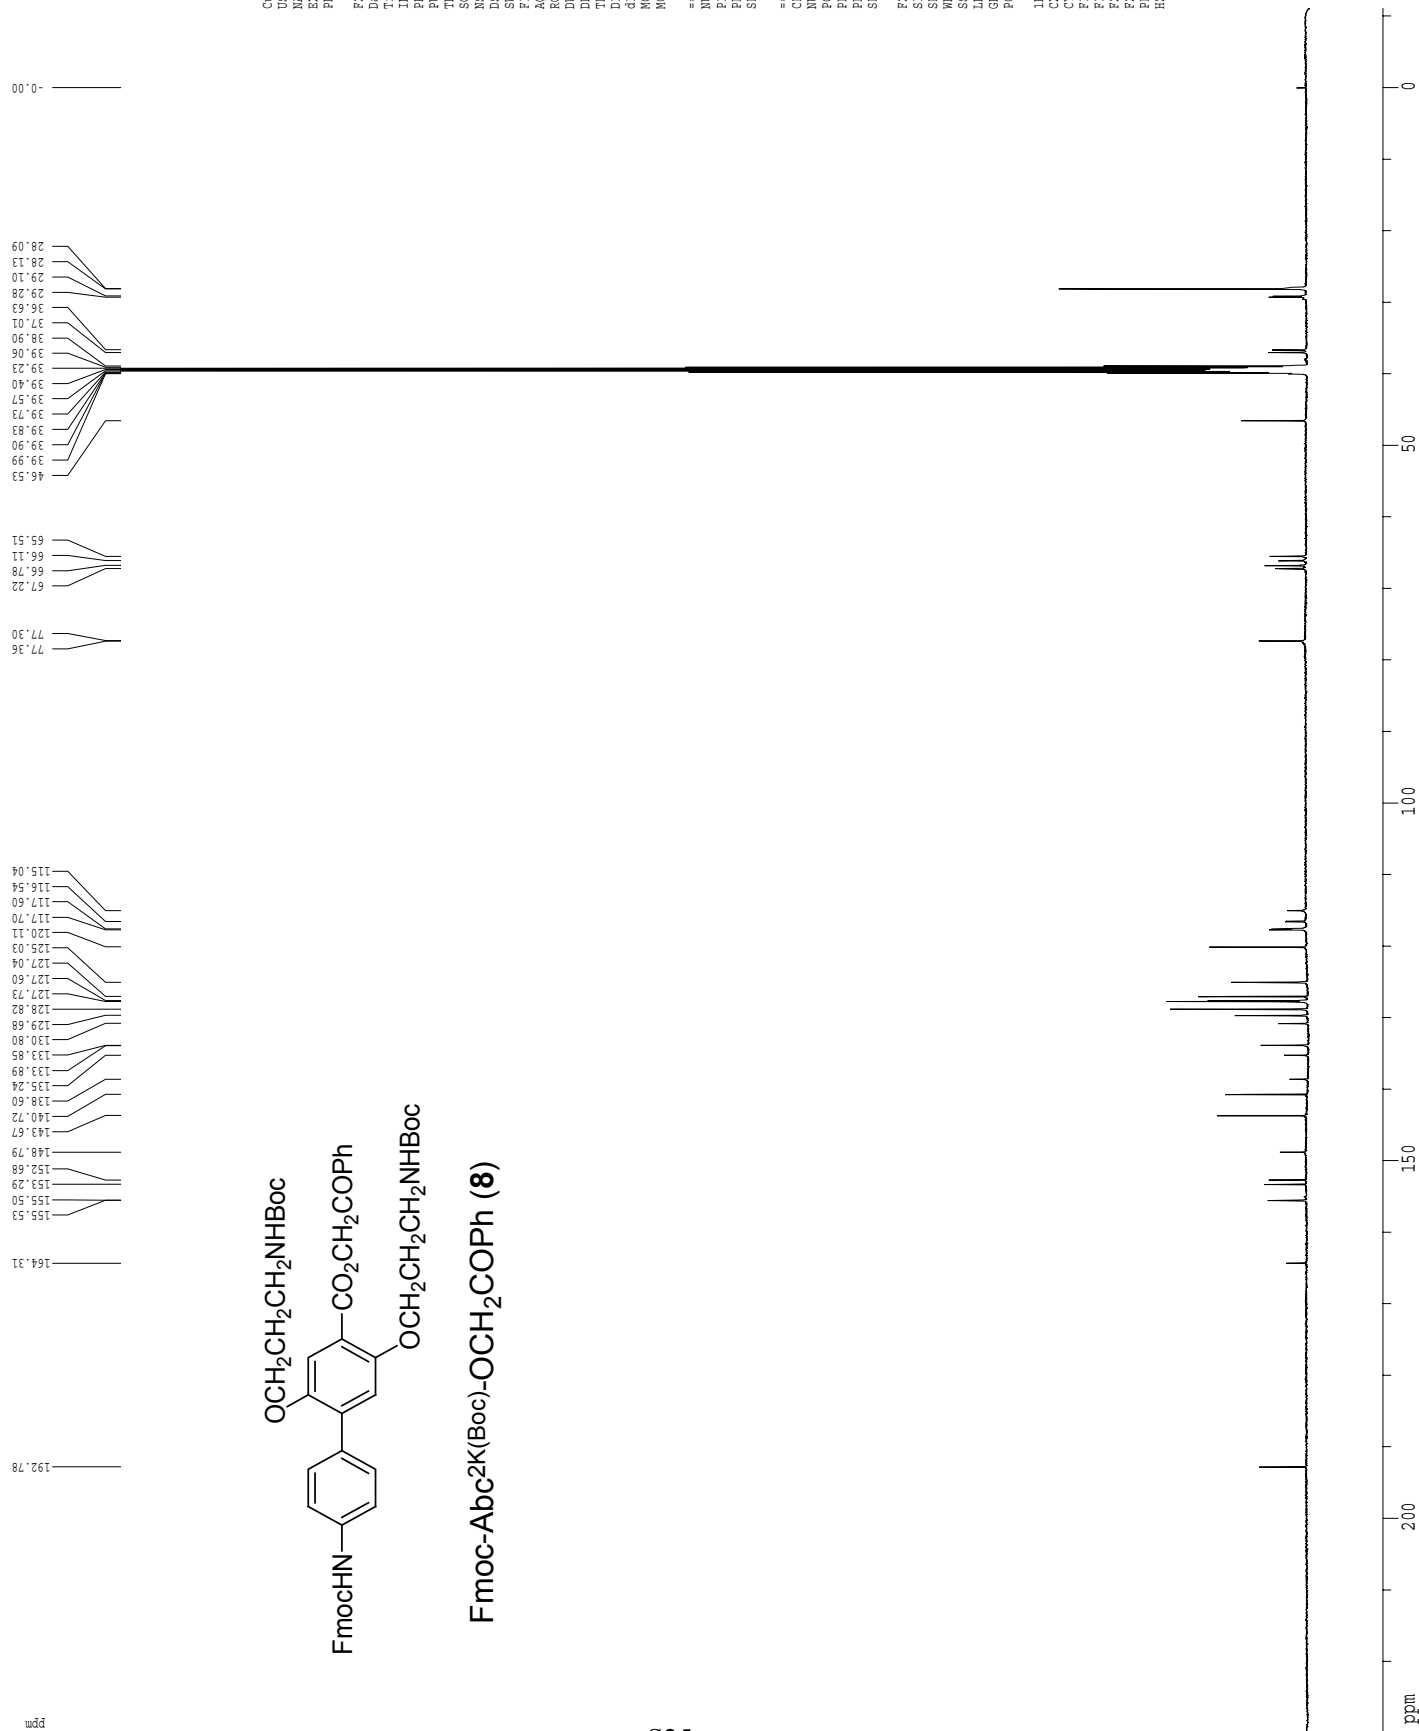

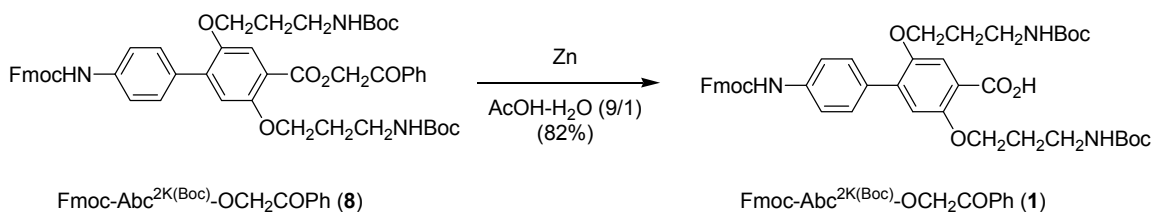

**Fmoc-Abc<sup>2K(Boc)</sup>-OH (1).** Zn dust (31.1 g, 460 mmol) was added to a solution of Fmoc-Abc<sup>2K(Boc)</sup>-OCH<sub>2</sub>COPh (**8**) (8.28 g, 9.20 mmol), AcOH (100 mL), and H<sub>2</sub>O (10 mL) and was stirred at 25 °C for 18 h.<sup>4</sup> The suspension was then diluted with CH<sub>2</sub>Cl<sub>2</sub> (ca. 100 mL) and stirred for an additional 30 min before the solids were removed by filtering the mixture through a bed of Celite<sup>®</sup>. The filtrate was concentrated by rotary evaporation and the resultant yellow oil was dissolved in CH<sub>2</sub>Cl<sub>2</sub> (300 mL), washed with 0.2 N HCl (250 mL), H<sub>2</sub>O (250 mL), and saturated aq sodium chloride (250 mL). The organic layer was dried over Na<sub>2</sub>SO<sub>4</sub> and concentrated by rotary evaporation to give a yellow oil. Purification was performed by dissolving the yellow oil in ether (ca. 50 mL) and precipitating with hexanes (ca. 200 mL) to provide Fmoc-Abc<sup>2K(Boc)</sup>-OH (**1**) as a white solid (5.9 g, 82 %): mp 108-110 °C; IR (KBr) 3366, 2978, 2874, 1712, 1689, 1608, 1590, 1533 cm<sup>-1</sup>; <sup>1</sup>H NMR, (500 MHz, CD<sub>3</sub>SOCD<sub>3</sub>, 328 K) δ 12.32 (s, 1 H), 9.63 (s, 1 H), 7.89 (d, *J* = 7.5 Hz, 2 H), 7.75 (d, *J* = 7.5 Hz, 2 H), 7.48 (s, 4 H), 7.42 (t, *J* = 7.4 Hz, 2 H), 7.35 (td, *J* = 7.4, 1.1 Hz, 2 H), 7.33 (s, 1 H), 7.01 (s, 1 H), 6.63 (br. s, 2 H), 4.51 (d, *J* = 6.6 Hz, 2 H), 4.32 (t, *J* = 6.7 Hz, 1 H), 4.05 (t, *J* = 6.3 Hz, 2 H), 3.92 (t, *J* = 6.3 Hz, 2 H), 3.11 (q, *J* = 6.6 Hz, 2 H), 3.02 (q, *J* = 6.5 Hz, 2 H), 1.83 (quintet, *J* = 6.5 Hz, 2 H), 1.75 (quintet, *J* = 6.5 Hz, 2 H), 1.36 (s, 18 H); <sup>13</sup>C NMR (125 MHz, CD<sub>3</sub>SOCD<sub>3</sub>, 298 K) δ 166.7, 155.5, 153.3, 151.9, 148.8, 143.7, 140.7, 138.4, 134.0, 131.0, 129.6, 127.6, 127.0,

<sup>4</sup> Hendrickson, J. B.; Kandall, C. *Tetrahedron Lett.* **1970**, *5*, 343-344.

125.0, 120.2, 120.1, 117.6, 116.5, 114.9, 77.4, 67.2, 66.1, 65.5, 46.5, 36.9, 36.7, 29.2, 29.1, 28.1; HRMS (ESIMS)  $m/z$  for  $C_{44}H_{51}N_3O_{10}Na$   $[M+Na]^+$  calcd 804.3472, found 804.3456.



$^{13}\text{C}$  spectrum with  $^1\text{H}$  decoupling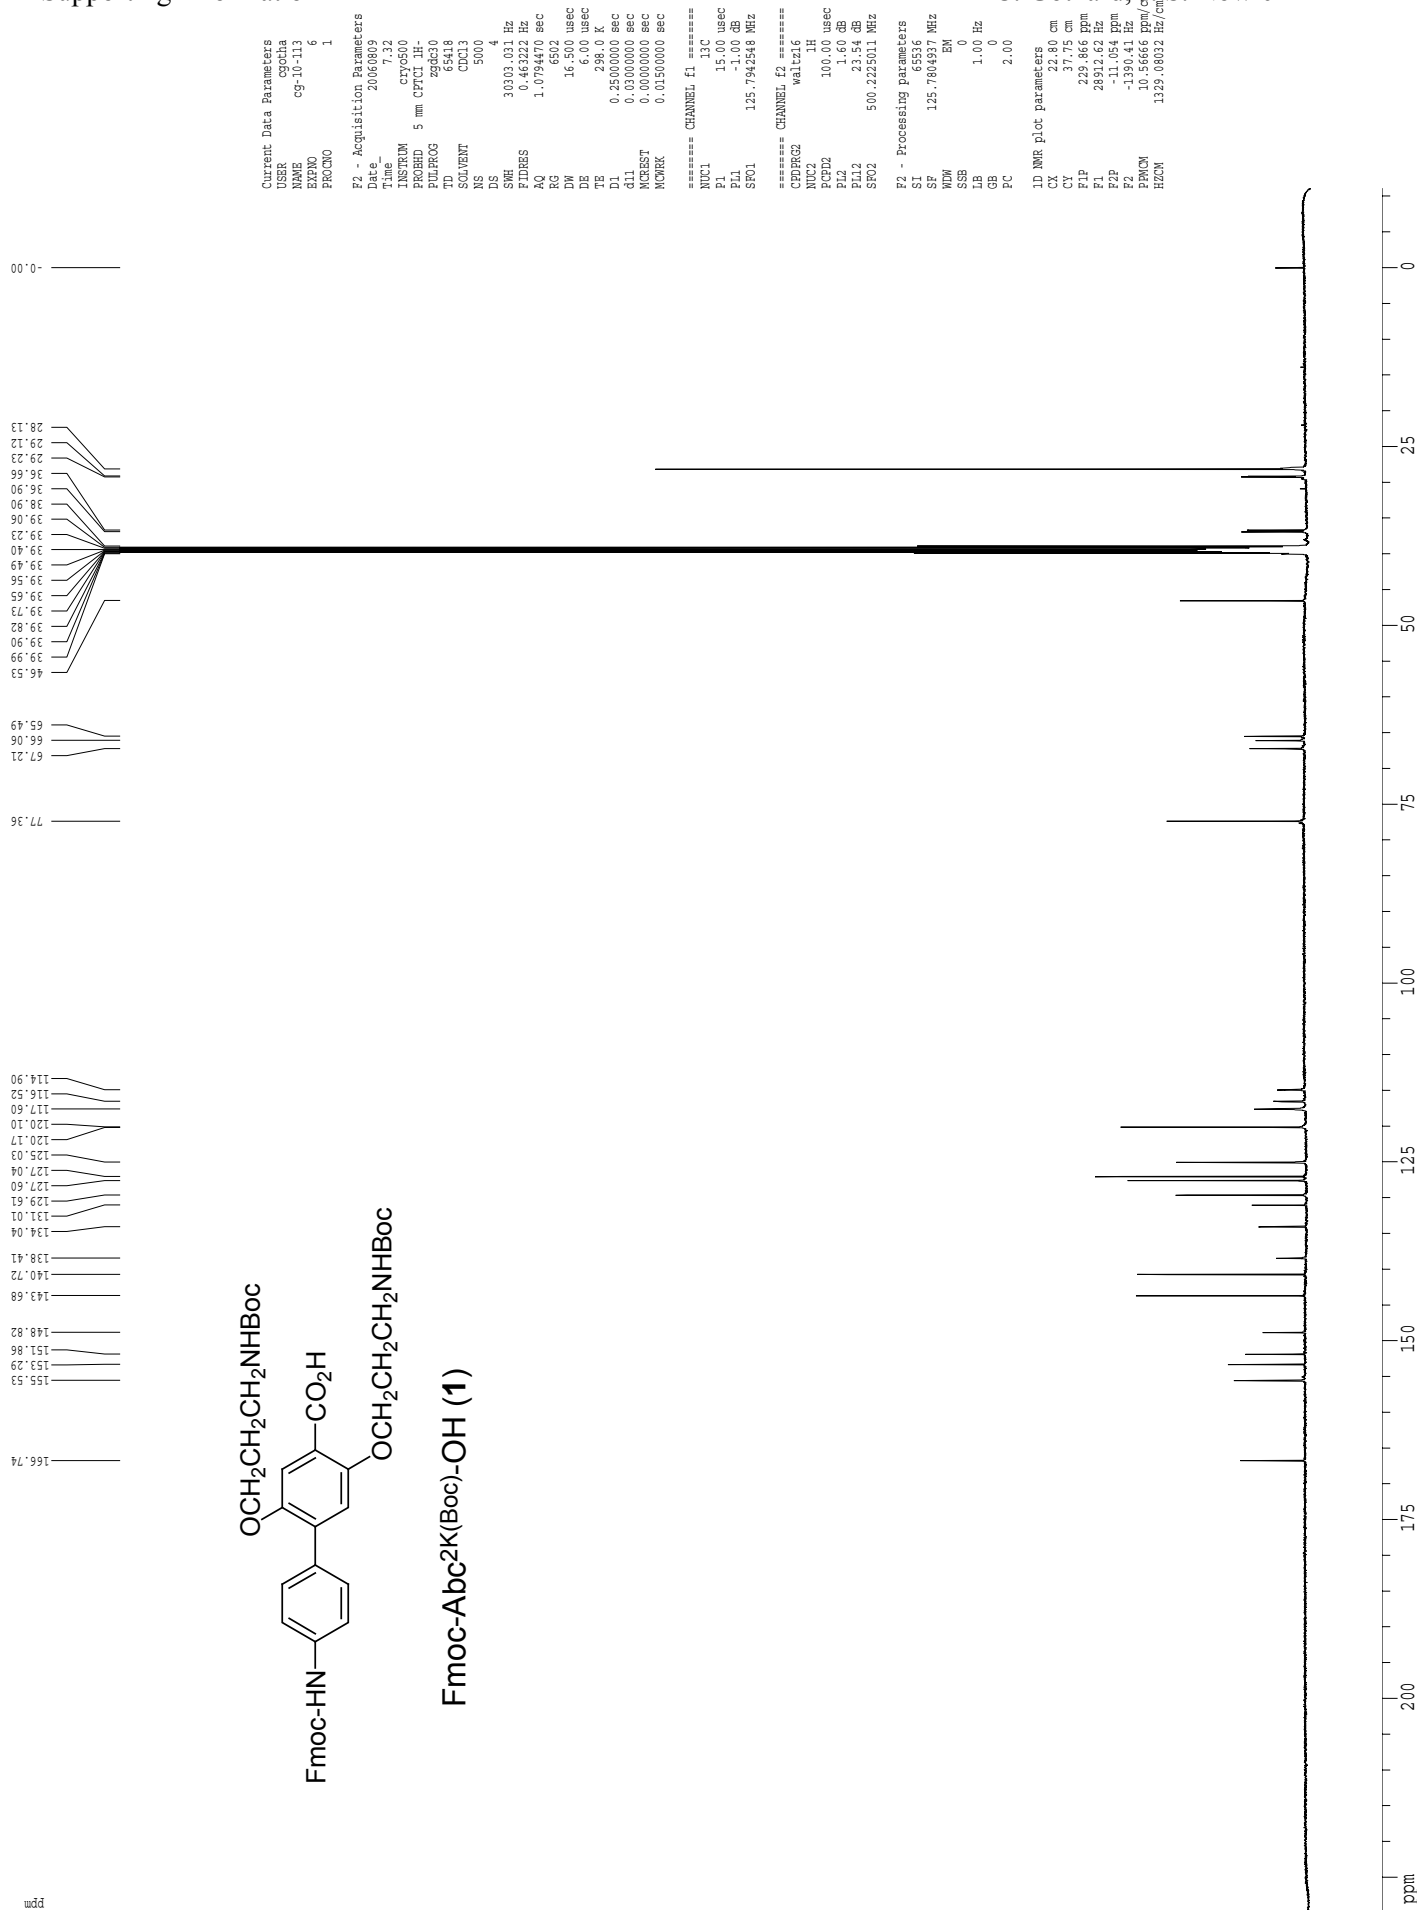

## Fmoc-Abc<sup>2K(Boc)</sup>-OH (1) Analytical RP-HPLC chromatograph

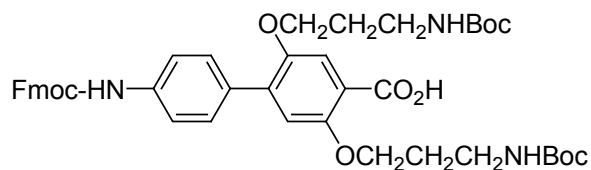

Analytical RP-HPLC (5-90% acetonitrile with 0.1% TFA over 20 min,  $\lambda = 214$ )

Sample ID: Fmoc-Abc2KBoc-OH 2nd recryst

Filename : D:\32Karat\Projects\Default\Data\Chris\cg-10-216 fmoc-Abc2K(Boc)-OH

Synthesis\Fmoc-Abc2KBoc-OH 2nd recryst

Method : Rocket Platinum Column 5-90% B in 20 min (214 nm)

Date Inj. : 10/15/2006 6:37:54 PM

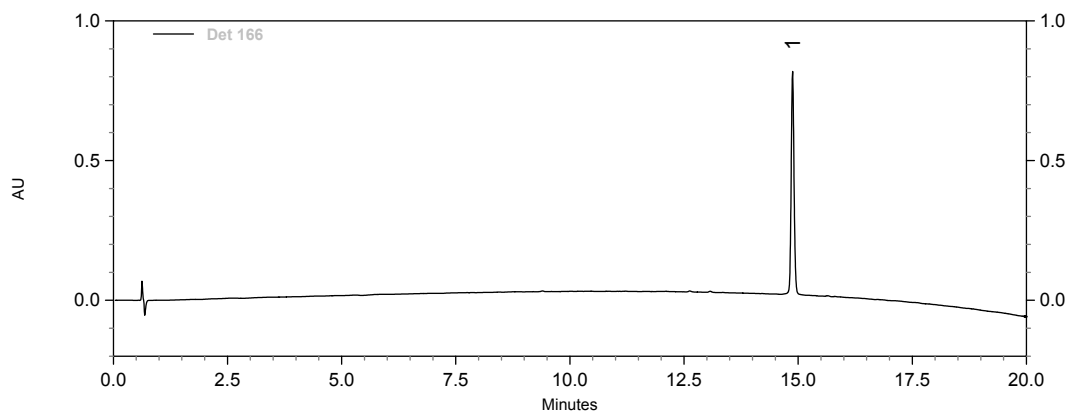

| Det 166 Results |         |        |        |          |      |
|-----------------|---------|--------|--------|----------|------|
| Time            | Area    | Area % | Height | Height % | Pk # |
| 14.878          | 3403014 | 100.00 | 793697 | 100.00   | 1    |
| Totals          | 3403014 | 100.00 | 793697 | 100.00   |      |

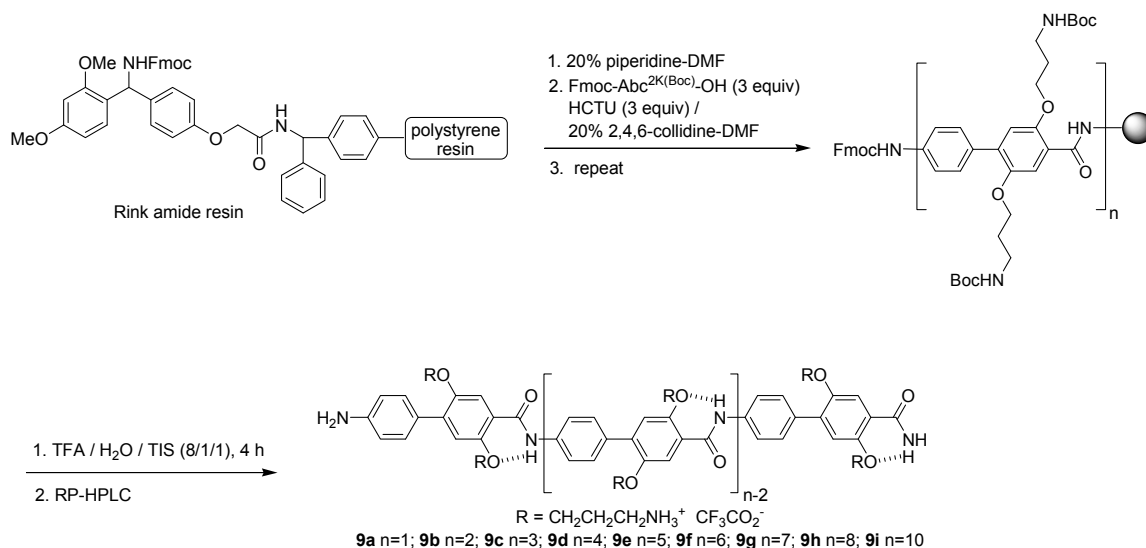

**Synthesis of Abc<sup>2K</sup> Oligomers 9a-9i.** A Bio-Rad Poly-Prep chromatography column containing 47 mg of Rink amide resin (0.64 mmol/g., Novabiochem, Rink Amide resin co. 100-200 mesh, 1% DVB) was soaked with DMF (3 × ca. 5 mL, 1 min each) and then drained under nitrogen pressure. The Fmoc group was removed by adding a solution of 20% piperidine-DMF (1 × ca. 5 mL for 1 min, 1 × ca. 5 mL for 20 min) to the resin, capping the column on both ends, and gently agitating the resin. The piperidine solution was drained, and the resin was washed with DMF (6 × ca. 5 mL, 1 min each) and CH<sub>2</sub>Cl<sub>2</sub> (6 × ca. 5 mL, 1 min each). Coupling of Fmoc-Abc<sup>2K</sup>(Boc)-OH (**1**) to the resin was accomplished by pre-activating Fmoc-Abc<sup>2K</sup>(Boc)-OH (70 mg, 0.09 mmol) with diisopropylcarbodiimide (13 μL, 0.085 mmol) and HOAt (12 mg, 0.09 mmol) in DMF-CH<sub>2</sub>Cl<sub>2</sub> (ca. 0.5 mL / ca. 0.2 mL). After 2-3 min, the coupling solution was added to the resin and the resin was gently agitated for ca. 12 h. (Fmoc-Abc<sup>2K</sup>(Boc)-OH (**1**) (3 equiv) was also coupled using HCTU<sup>5</sup> (3 equiv) in a solution of 20% 2,4,6-collidine-DMF and became the preferred method of coupling.) The reaction vessel was then drained and the

<sup>5</sup> Marder, O.; Shvo, Y.; Albericio, F. *Chim. Oggi* **2002**, *20*, 37-41.

resin was washed with DMF ( $6 \times$  ca. 5 mL, 1 min each) and then with  $\text{CH}_2\text{Cl}_2$  ( $3 \times$  ca. 5 mL, 1 min each).

To monitor the completeness of the couplings, a small amount of resin was cleaved in a new Bio-Rad column using a ca. 1-mL solution of  $\text{CF}_3\text{COOH}$ /water/triisopropylsilane, 8/1/1, v/v/v) and was vigorously agitated for ca. 2 h. The solution was then drained, concentrated by rotary evaporation, and the residue was dissolved in a mixture of water and  $\text{CH}_3\text{CN}$  and injected into an analytical RP-HPLC instrument to determine if any remaining aniline was present. (If any uncoupled aniline was observed on the chromatograph, an additional coupling was carried out. Typically, only the longer oligomers ( $n = 7-10$ ) required an additional coupling and were required less often when the HCTU coupling method was used.)

The above procedure was repeated until the desired length of  $\text{Abc}^{2K}$  oligomer was obtained. After final Fmoc deprotection using 20% piperidine-DMF, washing with DMF ( $5\times$ ) and  $\text{CH}_2\text{Cl}_2$  ( $5\times$ ), the resin was transferred to a small round bottomed flask equipped with a magnetic stirring bar and treated with ca. 10 mL of  $\text{CF}_3\text{COOH}$ /water/triisopropylsilane (8/1/1, v/v/v) for 2-4 h. The resin was then filtered off using a fritted filter funnel and washed several times with the cleavage cocktail. The solution was concentrated by rotary evaporation. The resultant oil was dissolved in a mixture of water and  $\text{CH}_3\text{CN}$ , and the oligomer was purified by preparative RP-HPLC (water- $\text{CH}_3\text{CN}$  buffers with 0.1 % TFA). (The oligomers typically eluted between 20 and 30%  $\text{CH}_3\text{CN}$ .) Pure fractions of the product were concentrated by rotary evaporation to remove most of the  $\text{CH}_3\text{CN}$ , frozen, and then lyophilized to afford a white powder (15-



20 mg). The remaining less pure HPLC fractions were also lyophilized into a white powder (ca. 20 mg) and stored for future use.

H-(Abc<sup>2K</sup>)<sub>1</sub>-NH<sub>2</sub> TFA salt **9a**  
Analytical RP-HPLC chromatograph and mass spectrum (ESI-MS)

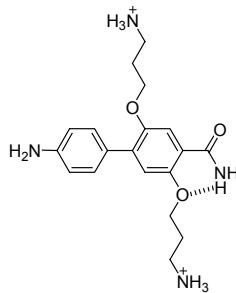

(a) Analytical RP-HPLC (5-50% acetonitrile with 0.1% TFA over 10 min,  $\lambda = 214$ )

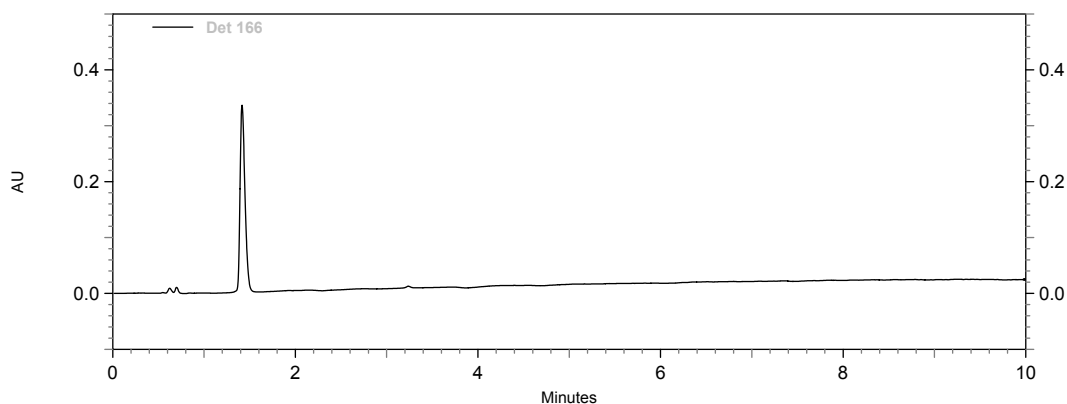

(b) ESI Mass spectrum. (Calcd exact mass for C<sub>19</sub>H<sub>26</sub>N<sub>4</sub>O<sub>3</sub> [M] = 358.20.)

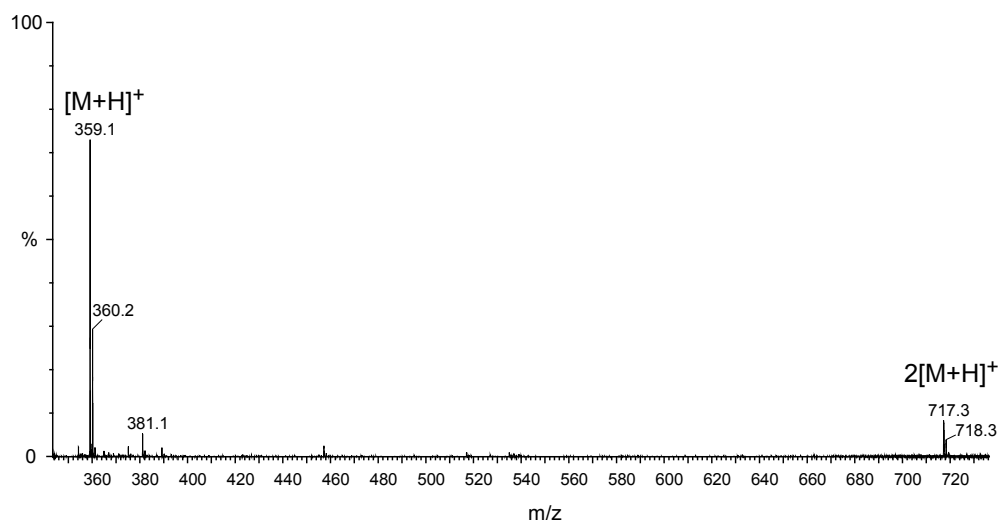

**<sup>1</sup>H NMR of Abc2K Monomer H-Abc2K-NH<sub>2</sub> (500 MHz, 298 K, D<sub>2</sub>O)**

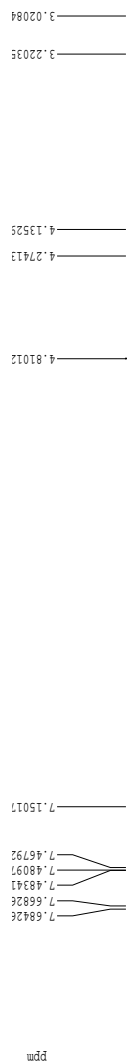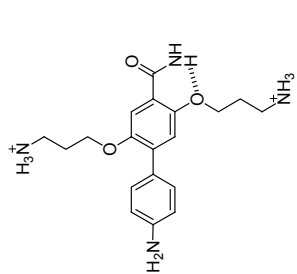

**H-(Abc<sup>2</sup>K)<sub>1</sub>-NH<sub>2</sub> (9a)**

HDO

```

Current Data Parameters
Date_      20061111
Time_      21.34
NAME_      ma-1-201
EXPNO_     1
PROCNO_    1

F2 - Acquisition Parameters
Date_      20061111
Time_      21.34
INSTRUM_   cryos60
PROBHD_    5 mm CPTCI 1H-
PULPROG_   zg30
TD_        61728
SOLVENT_   D2O
NS_        2
DS_        2
SWH_        8012.820 Hz
FIDRES_     0.098043 Hz
AQ_         5.0989774 sec
RG_         9
DM_         62.400 usec
DE_         6.00 usec
TE_         298.0 K
D1_         0.1000000 sec
MCREST_    0.0000000 sec
MORBK_     0.01500000 sec

===== CHANNEL f1 =====
NUC1_       1H
P1_         8.00 usec
PL1_        1.60 dB
SFO1_       500.225015 MHz

F2 - Processing parameters
SI_         65536
SF_         500.2119992 MHz
WDW_        EM
SSB_        0
LB_         0.30 Hz
GB_         0
PC_         4.00

1D NMR Plot Parameters
CV_         22.80 cm
AQ_         8.500 usec
FIDRES_     0.098043 Hz
F1_         4251.87 Hz
F2_         -0.500 usec
PPM0_       -250.11 Hz
PPM1_       0.39474 Hz
HZCM_       197.45528 Hz
    
```

Gothard, J. S. Nowick

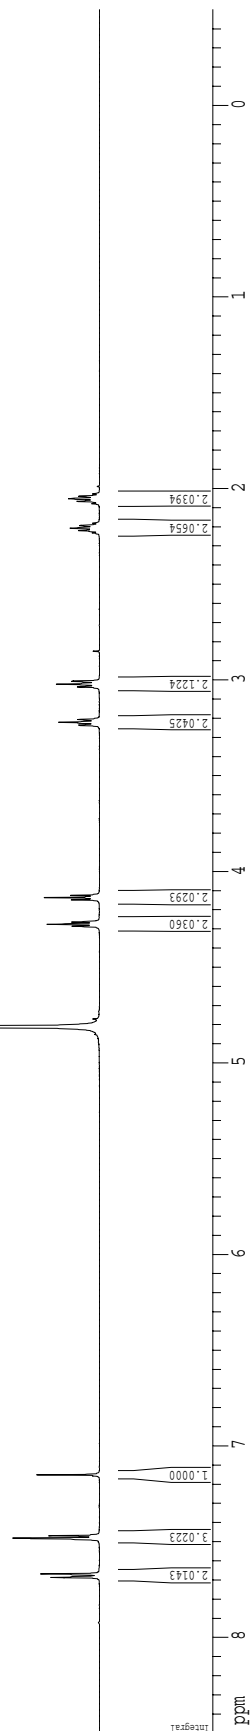

H-(Abc<sup>2K</sup>)<sub>2</sub>-NH<sub>2</sub> TFA salt **9b**  
Analytical RP-HPLC chromatograph and mass spectrum (ESI-MS)

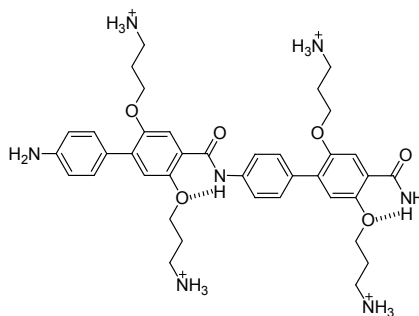

(a) Analytical RP-HPLC (5-50% acetonitrile with 0.1% TFA over 20 min,  $\lambda = 214$ )

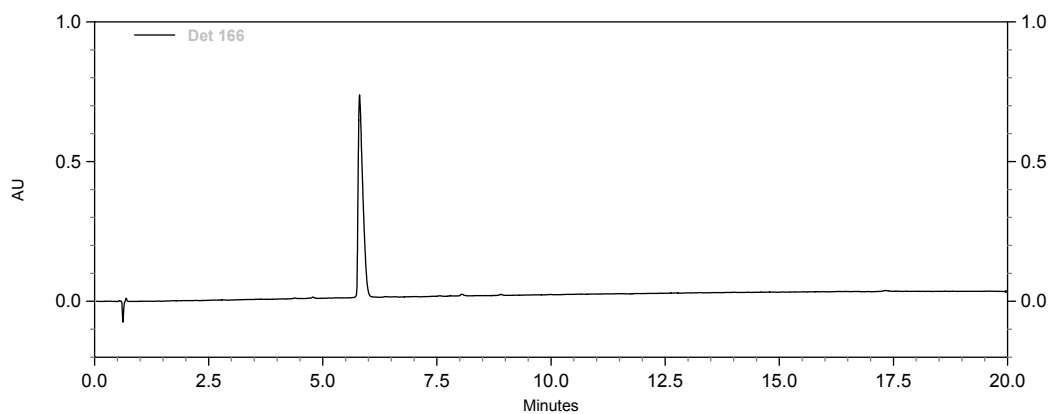

(b) ESI Mass spectrum. (Calcd exact mass for C<sub>38</sub>H<sub>49</sub>N<sub>7</sub>O<sub>6</sub> [M] = 699.37)

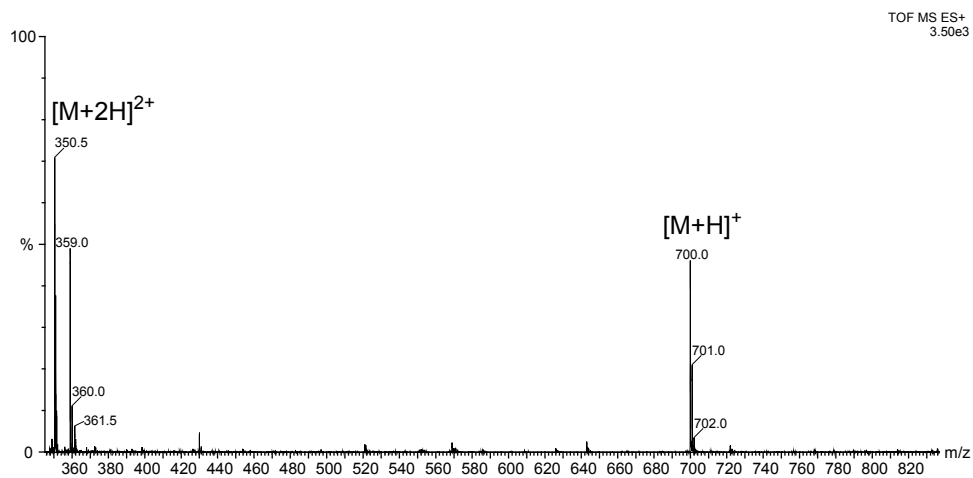

<sup>1</sup>H NMR of Abc2K Dimer H-(Abc2K)<sub>2</sub>-NH<sub>2</sub> (500 MHz, 298 K, D<sub>2</sub>O)

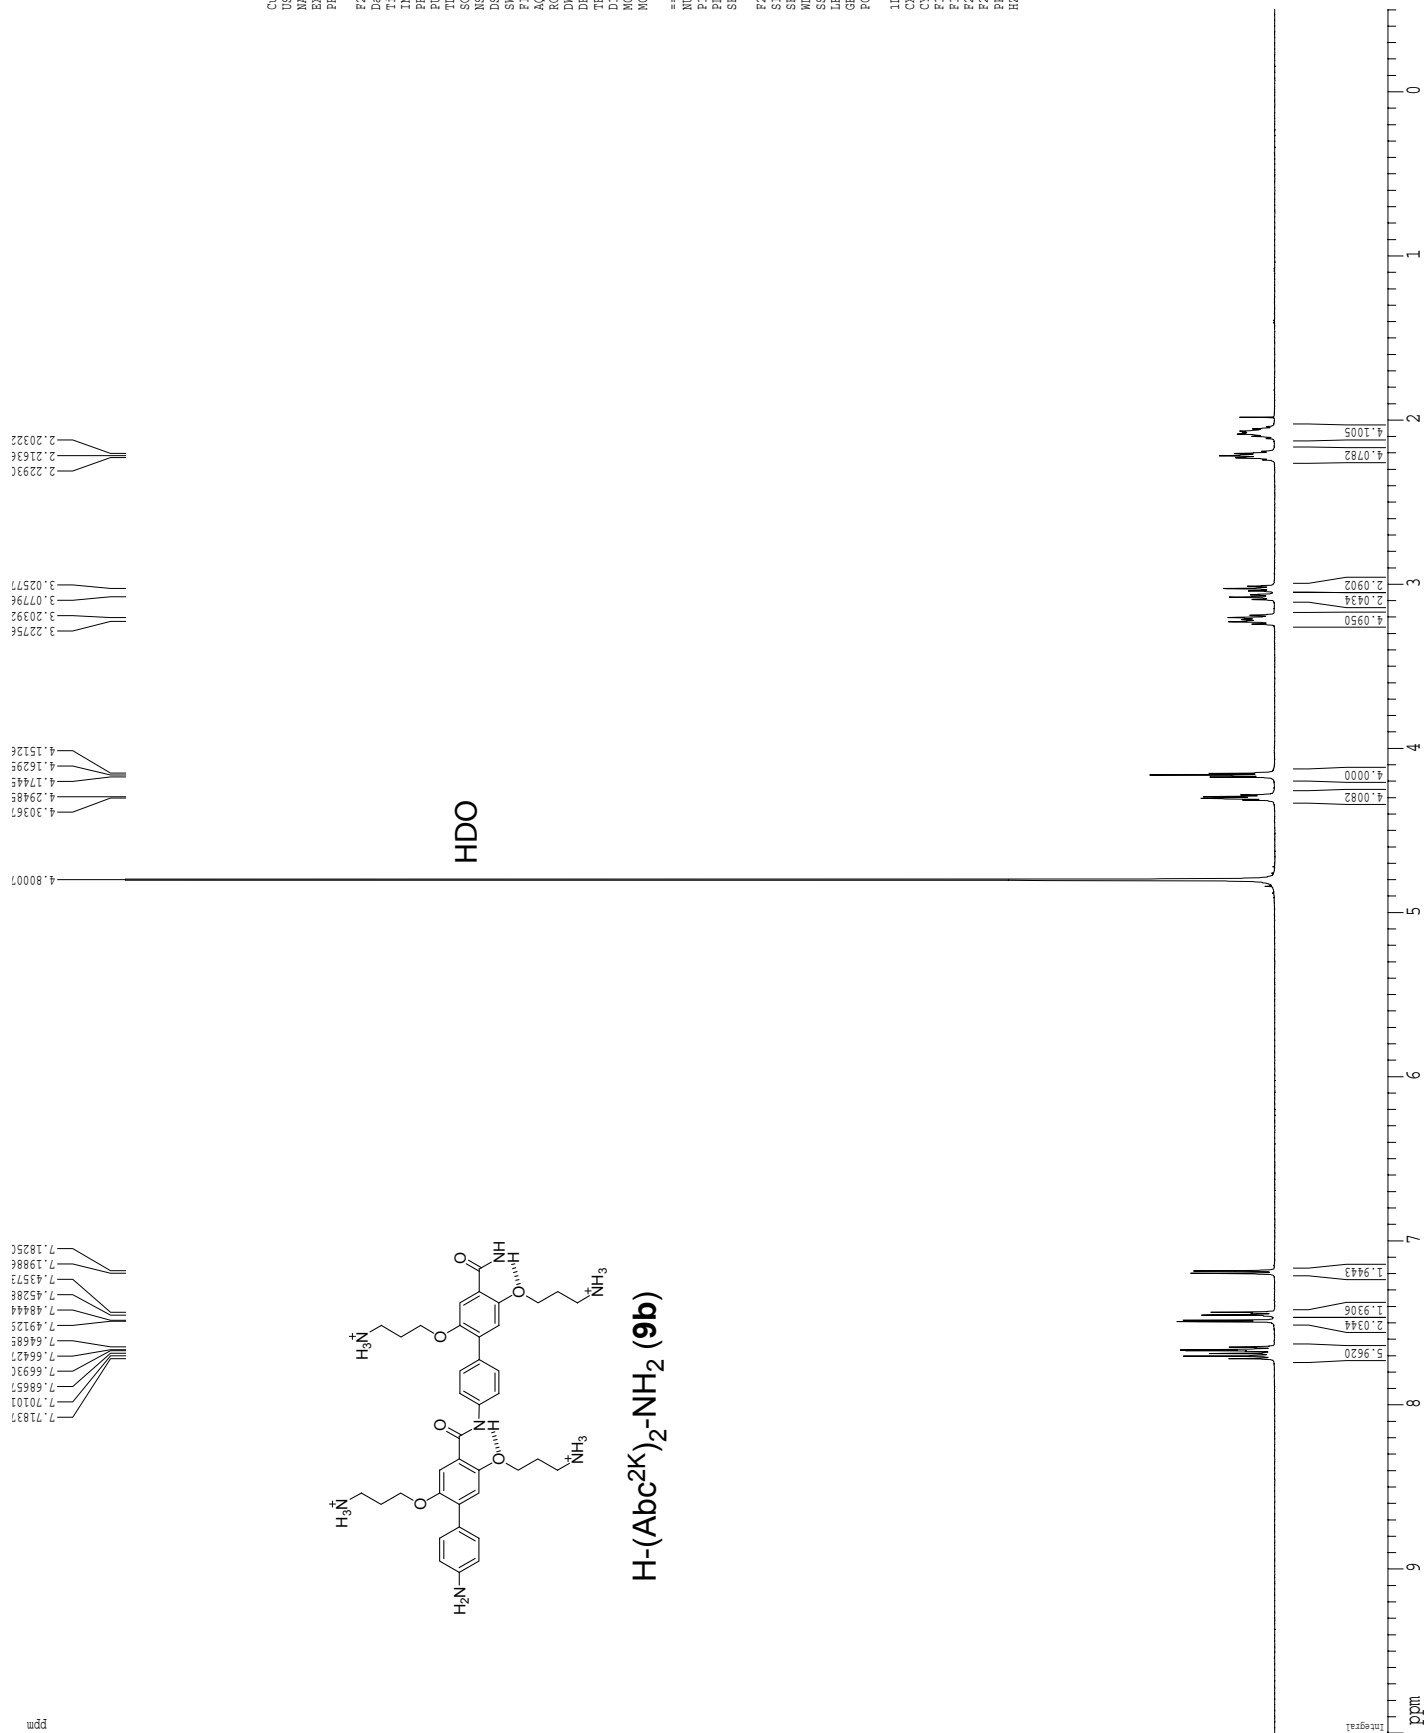

Supporting Information

```

Current Data Parameters
=====
USER          ccochia
NAME          cg-6-109
EXPNO        1
PROCNO       1

F2 - Acquisition Parameters
=====
Date_        20060810
Time         23.48
INSTRUM      cryso500
PROBHD       5 mm CPTCI IH-
PULPROG      zgpg30
SOLVENT      D2O
NS           44
DS           2
SWH          8012.820 Hz
FIDRES      0.058043 Hz
AQ          5.0988774 sec
RG           9
DE           62.400 usec
TE           298.0 K
D1           0.1000000 sec
ACQRES      0.0000000 sec
PCPRG1      0.0150000 sec
===== CHANNEL f1 =====
NUC1         1H
P1           8.00 usec
PL1          1.60 dB
SFO1         500.225015 MHz

F2 - Processing parameters
=====
SI           65536
SF           500.220044 MHz
WDW          EM
SSB          0
LB           0.30 Hz
GB           0
PC           4.00

1D NMR plot parameters
=====
CX           22.80 cm
CY           74.46 cm
FIP          10.000 ppm
F1           5002.20 Hz
F2           -0.500 ppm
F3           -250.11 Hz
PQMCN       0.46053 ppm/cm
HZCN        230.36449 Hz/cm
    
```

C. Gothard, J. S. Nowick

H-(Abc<sup>2K</sup>)<sub>3</sub>-NH<sub>2</sub> TFA salt **9c**  
Analytical RP-HPLC chromatograph and mass spectrum (ESI-MS)

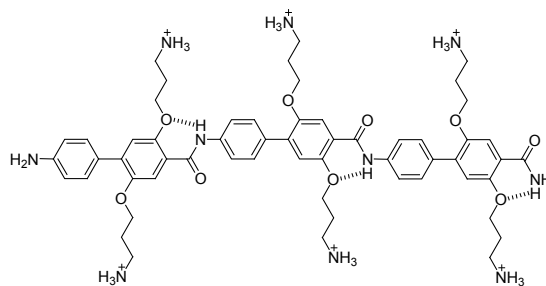

(a) Analytical RP-HPLC (5-50% acetonitrile with 0.1% TFA over 20 min,  $\lambda = 214$ )

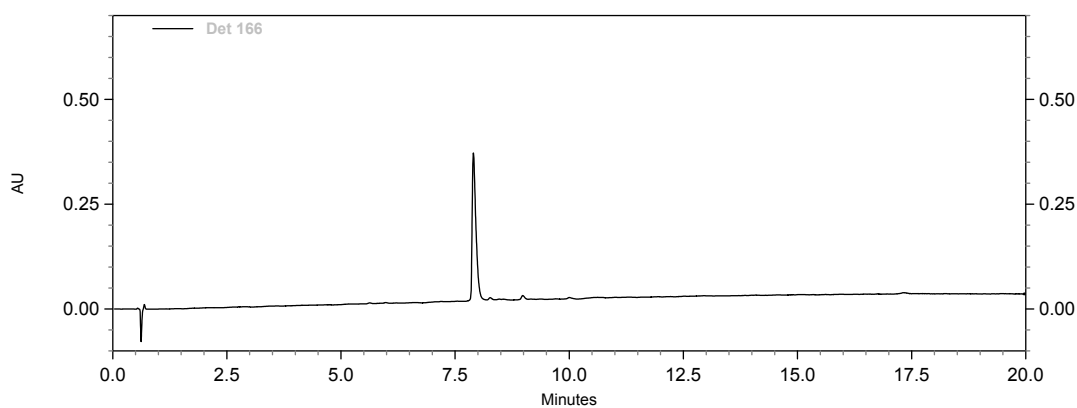

(b) ESI Mass spectrum. (Calcd exact mass for C<sub>57</sub>H<sub>72</sub>N<sub>10</sub>O<sub>9</sub> [M] = 1040.55)

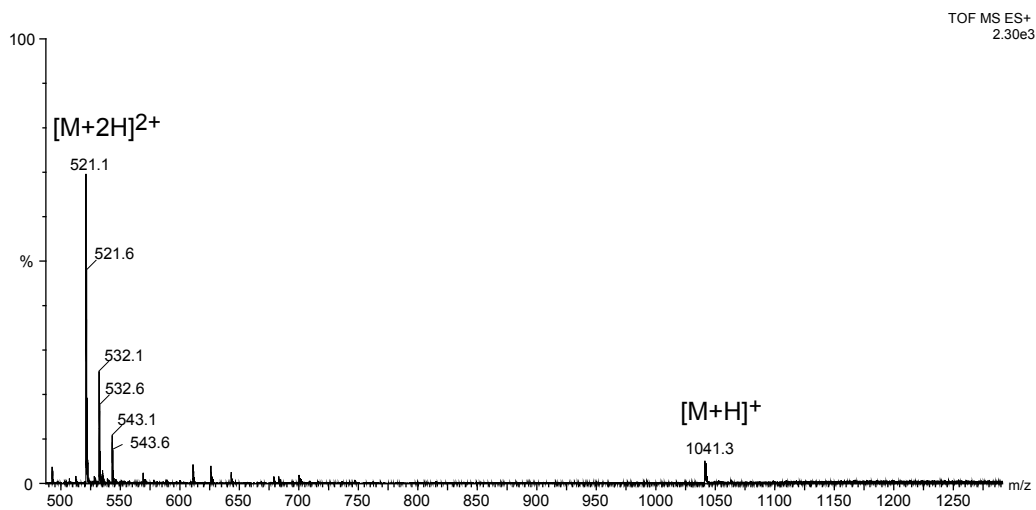

<sup>1</sup>H NMR of Abc2K Trimer H-(Abc2K)<sub>3</sub>-NH<sub>2</sub> (500 MHz, 298 K, D<sub>2</sub>O)

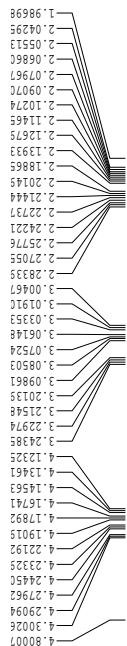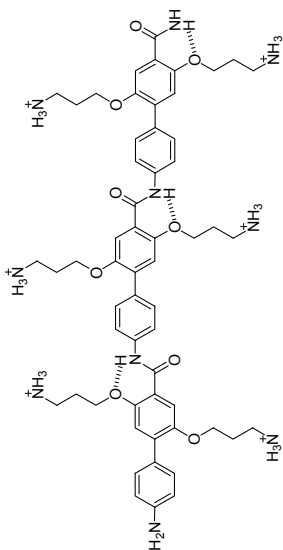

H-(Abc2K)<sub>3</sub>-NH<sub>2</sub> (9c)

H<sub>2</sub>O

```

===== CHANNEL f1 =====
Date_ 20050521
Time_ 11.00
INSTRUM spect
PROBHD 5 mm CPYCI-1H-
PULPROG zgpg30
TD 81728
SOLVENT D2O
NS 16
DS 2
SWH 8012.820 Hz
FIDRES 0.098043 Hz
AQ 5.0998774 sec
RG 203.2
WDW 62.400 usec
SS 8.00 usec
LB 0.30 Hz
GB 0
PC 4.00

===== CHANNEL f1 =====
NUC1 1H
P1 8.00 usec
PL1 1.60 dB
SFO1 500.2135015 MHz

F2 - Processing parameters
S1 65536
WDW 500.2100062 MHz
SS 8.00 usec
SFB 0
LB 0.30 Hz
GB 0
PC 4.00

1D NMR plot parameters
CX 22.80 cm
CY 75.00 cm
FID 10.000 ppm
F1 5002.10 Hz
F2 -0.500 ppm
F3 0.000 Hz
F4 0.000 Hz
F5 0.000 Hz
F6 0.000 Hz
F7 0.000 Hz
F8 0.000 Hz
F9 0.000 Hz
F10 0.000 Hz
F11 0.000 Hz
F12 0.000 Hz
F13 0.000 Hz
F14 0.000 Hz
F15 0.000 Hz
F16 0.000 Hz
F17 0.000 Hz
F18 0.000 Hz
F19 0.000 Hz
F20 0.000 Hz
F21 0.000 Hz
F22 0.000 Hz
F23 0.000 Hz
F24 0.000 Hz
F25 0.000 Hz
F26 0.000 Hz
F27 0.000 Hz
F28 0.000 Hz
F29 0.000 Hz
F30 0.000 Hz
F31 0.000 Hz
F32 0.000 Hz
F33 0.000 Hz
F34 0.000 Hz
F35 0.000 Hz
F36 0.000 Hz
F37 0.000 Hz
F38 0.000 Hz
F39 0.000 Hz
F40 0.000 Hz
F41 0.000 Hz
F42 0.000 Hz
F43 0.000 Hz
F44 0.000 Hz
F45 0.000 Hz
F46 0.000 Hz
F47 0.000 Hz
F48 0.000 Hz
F49 0.000 Hz
F50 0.000 Hz
F51 0.000 Hz
F52 0.000 Hz
F53 0.000 Hz
F54 0.000 Hz
F55 0.000 Hz
F56 0.000 Hz
F57 0.000 Hz
F58 0.000 Hz
F59 0.000 Hz
F60 0.000 Hz
F61 0.000 Hz
F62 0.000 Hz
F63 0.000 Hz
F64 0.000 Hz
F65 0.000 Hz
F66 0.000 Hz
F67 0.000 Hz
F68 0.000 Hz
F69 0.000 Hz
F70 0.000 Hz
F71 0.000 Hz
F72 0.000 Hz
F73 0.000 Hz
F74 0.000 Hz
F75 0.000 Hz
F76 0.000 Hz
F77 0.000 Hz
F78 0.000 Hz
F79 0.000 Hz
F80 0.000 Hz
F81 0.000 Hz
F82 0.000 Hz
F83 0.000 Hz
F84 0.000 Hz
F85 0.000 Hz
F86 0.000 Hz
F87 0.000 Hz
F88 0.000 Hz
F89 0.000 Hz
F90 0.000 Hz
F91 0.000 Hz
F92 0.000 Hz
F93 0.000 Hz
F94 0.000 Hz
F95 0.000 Hz
F96 0.000 Hz
F97 0.000 Hz
F98 0.000 Hz
F99 0.000 Hz
F100 0.000 Hz
F101 0.000 Hz
F102 0.000 Hz
F103 0.000 Hz
F104 0.000 Hz
F105 0.000 Hz
F106 0.000 Hz
F107 0.000 Hz
F108 0.000 Hz
F109 0.000 Hz
F110 0.000 Hz
F111 0.000 Hz
F112 0.000 Hz
F113 0.000 Hz
F114 0.000 Hz
F115 0.000 Hz
F116 0.000 Hz
F117 0.000 Hz
F118 0.000 Hz
F119 0.000 Hz
F120 0.000 Hz
F121 0.000 Hz
F122 0.000 Hz
F123 0.000 Hz
F124 0.000 Hz
F125 0.000 Hz
F126 0.000 Hz
F127 0.000 Hz
F128 0.000 Hz
F129 0.000 Hz
F130 0.000 Hz
F131 0.000 Hz
F132 0.000 Hz
F133 0.000 Hz
F134 0.000 Hz
F135 0.000 Hz
F136 0.000 Hz
F137 0.000 Hz
F138 0.000 Hz
F139 0.000 Hz
F140 0.000 Hz
F141 0.000 Hz
F142 0.000 Hz
F143 0.000 Hz
F144 0.000 Hz
F145 0.000 Hz
F146 0.000 Hz
F147 0.000 Hz
F148 0.000 Hz
F149 0.000 Hz
F150 0.000 Hz
F151 0.000 Hz
F152 0.000 Hz
F153 0.000 Hz
F154 0.000 Hz
F155 0.000 Hz
F156 0.000 Hz
F157 0.000 Hz
F158 0.000 Hz
F159 0.000 Hz
F160 0.000 Hz
F161 0.000 Hz
F162 0.000 Hz
F163 0.000 Hz
F164 0.000 Hz
F165 0.000 Hz
F166 0.000 Hz
F167 0.000 Hz
F168 0.000 Hz
F169 0.000 Hz
F170 0.000 Hz
F171 0.000 Hz
F172 0.000 Hz
F173 0.000 Hz
F174 0.000 Hz
F175 0.000 Hz
F176 0.000 Hz
F177 0.000 Hz
F178 0.000 Hz
F179 0.000 Hz
F180 0.000 Hz
F181 0.000 Hz
F182 0.000 Hz
F183 0.000 Hz
F184 0.000 Hz
F185 0.000 Hz
F186 0.000 Hz
F187 0.000 Hz
F188 0.000 Hz
F189 0.000 Hz
F190 0.000 Hz
F191 0.000 Hz
F192 0.000 Hz
F193 0.000 Hz
F194 0.000 Hz
F195 0.000 Hz
F196 0.000 Hz
F197 0.000 Hz
F198 0.000 Hz
F199 0.000 Hz
F200 0.000 Hz
F201 0.000 Hz
F202 0.000 Hz
F203 0.000 Hz
F204 0.000 Hz
F205 0.000 Hz
F206 0.000 Hz
F207 0.000 Hz
F208 0.000 Hz
F209 0.000 Hz
F210 0.000 Hz
F211 0.000 Hz
F212 0.000 Hz
F213 0.000 Hz
F214 0.000 Hz
F215 0.000 Hz
F216 0.000 Hz
F217 0.000 Hz
F218 0.000 Hz
F219 0.000 Hz
F220 0.000 Hz
F221 0.000 Hz
F222 0.000 Hz
F223 0.000 Hz
F224 0.000 Hz
F225 0.000 Hz
F226 0.000 Hz
F227 0.000 Hz
F228 0.000 Hz
F229 0.000 Hz
F230 0.000 Hz
F231 0.000 Hz
F232 0.000 Hz
F233 0.000 Hz
F234 0.000 Hz
F235 0.000 Hz
F236 0.000 Hz
F237 0.000 Hz
F238 0.000 Hz
F239 0.000 Hz
F240 0.000 Hz
F241 0.000 Hz
F242 0.000 Hz
F243 0.000 Hz
F244 0.000 Hz
F245 0.000 Hz
F246 0.000 Hz
F247 0.000 Hz
F248 0.000 Hz
F249 0.000 Hz
F250 0.000 Hz
F251 0.000 Hz
F252 0.000 Hz
F253 0.000 Hz
F254 0.000 Hz
F255 0.000 Hz
F256 0.000 Hz
F257 0.000 Hz
F258 0.000 Hz
F259 0.000 Hz
F260 0.000 Hz
F261 0.000 Hz
F262 0.000 Hz
F263 0.000 Hz
F264 0.000 Hz
F265 0.000 Hz
F266 0.000 Hz
F267 0.000 Hz
F268 0.000 Hz
F269 0.000 Hz
F270 0.000 Hz
F271 0.000 Hz
F272 0.000 Hz
F273 0.000 Hz
F274 0.000 Hz
F275 0.000 Hz
F276 0.000 Hz
F277 0.000 Hz
F278 0.000 Hz
F279 0.000 Hz
F280 0.000 Hz
F281 0.000 Hz
F282 0.000 Hz
F283 0.000 Hz
F284 0.000 Hz
F285 0.000 Hz
F286 0.000 Hz
F287 0.000 Hz
F288 0.000 Hz
F289 0.000 Hz
F290 0.000 Hz
F291 0.000 Hz
F292 0.000 Hz
F293 0.000 Hz
F294 0.000 Hz
F295 0.000 Hz
F296 0.000 Hz
F297 0.000 Hz
F298 0.000 Hz
F299 0.000 Hz
F300 0.000 Hz
F301 0.000 Hz
F302 0.000 Hz
F303 0.000 Hz
F304 0.000 Hz
F305 0.000 Hz
F306 0.000 Hz
F307 0.000 Hz
F308 0.000 Hz
F309 0.000 Hz
F310 0.000 Hz
F311 0.000 Hz
F312 0.000 Hz
F313 0.000 Hz
F314 0.000 Hz
F315 0.000 Hz
F316 0.000 Hz
F317 0.000 Hz
F318 0.000 Hz
F319 0.000 Hz
F320 0.000 Hz
F321 0.000 Hz
F322 0.000 Hz
F323 0.000 Hz
F324 0.000 Hz
F325 0.000 Hz
F326 0.000 Hz
F327 0.000 Hz
F328 0.000 Hz
F329 0.000 Hz
F330 0.000 Hz
F331 0.000 Hz
F332 0.000 Hz
F333 0.000 Hz
F334 0.000 Hz
F335 0.000 Hz
F336 0.000 Hz
F337 0.000 Hz
F338 0.000 Hz
F339 0.000 Hz
F340 0.000 Hz
F341 0.000 Hz
F342 0.000 Hz
F343 0.000 Hz
F344 0.000 Hz
F345 0.000 Hz
F346 0.000 Hz
F347 0.000 Hz
F348 0.000 Hz
F349 0.000 Hz
F350 0.000 Hz
F351 0.000 Hz
F352 0.000 Hz
F353 0.000 Hz
F354 0.000 Hz
F355 0.000 Hz
F356 0.000 Hz
F357 0.000 Hz
F358 0.000 Hz
F359 0.000 Hz
F360 0.000 Hz
F361 0.000 Hz
F362 0.000 Hz
F363 0.000 Hz
F364 0.000 Hz
F365 0.000 Hz
F366 0.000 Hz
F367 0.000 Hz
F368 0.000 Hz
F369 0.000 Hz
F370 0.000 Hz
F371 0.000 Hz
F372 0.000 Hz
F373 0.000 Hz
F374 0.000 Hz
F375 0.000 Hz
F376 0.000 Hz
F377 0.000 Hz
F378 0.000 Hz
F379 0.000 Hz
F380 0.000 Hz
F381 0.000 Hz
F382 0.000 Hz
F383 0.000 Hz
F384 0.000 Hz
F385 0.000 Hz
F386 0.000 Hz
F387 0.000 Hz
F388 0.000 Hz
F389 0.000 Hz
F390 0.000 Hz
F391 0.000 Hz
F392 0.000 Hz
F393 0.000 Hz
F394 0.000 Hz
F395 0.000 Hz
F396 0.000 Hz
F397 0.000 Hz
F398 0.000 Hz
F399 0.000 Hz
F400 0.000 Hz
F401 0.000 Hz
F402 0.000 Hz
F403 0.000 Hz
F404 0.000 Hz
F405 0.000 Hz
F406 0.000 Hz
F407 0.000 Hz
F408 0.000 Hz
F409 0.000 Hz
F410 0.000 Hz
F411 0.000 Hz
F412 0.000 Hz
F413 0.000 Hz
F414 0.000 Hz
F415 0.000 Hz
F416 0.000 Hz
F417 0.000 Hz
F418 0.000 Hz
F419 0.000 Hz
F420 0.000 Hz
F421 0.000 Hz
F422 0.000 Hz
F423 0.000 Hz
F424 0.000 Hz
F425 0.000 Hz
F426 0.000 Hz
F427 0.000 Hz
F428 0.000 Hz
F429 0.000 Hz
F430 0.000 Hz
F431 0.000 Hz
F432 0.000 Hz
F433 0.000 Hz
F434 0.000 Hz
F435 0.000 Hz
F436 0.000 Hz
F437 0.000 Hz
F438 0.000 Hz
F439 0.000 Hz
F440 0.000 Hz
F441 0.000 Hz
F442 0.000 Hz
F443 0.000 Hz
F444 0.000 Hz
F445 0.000 Hz
F446 0.000 Hz
F447 0.000 Hz
F448 0.000 Hz
F449 0.000 Hz
F450 0.000 Hz
F451 0.000 Hz
F452 0.000 Hz
F453 0.000 Hz
F454 0.000 Hz
F455 0.000 Hz
F456 0.000 Hz
F457 0.000 Hz
F458 0.000 Hz
F459 0.000 Hz
F460 0.000 Hz
F461 0.000 Hz
F462 0.000 Hz
F463 0.000 Hz
F464 0.000 Hz
F465 0.000 Hz
F466 0.000 Hz
F467 0.000 Hz
F468 0.000 Hz
F469 0.000 Hz
F470 0.000 Hz
F471 0.000 Hz
F472 0.000 Hz
F473 0.000 Hz
F474 0.000 Hz
F475 0.000 Hz
F476 0.000 Hz
F477 0.000 Hz
F478 0.000 Hz
F479 0.000 Hz
F480 0.000 Hz
F481 0.000 Hz
F482 0.000 Hz
F483 0.000 Hz
F484 0.000 Hz
F485 0.000 Hz
F486 0.000 Hz
F487 0.000 Hz
F488 0.000 Hz
F489 0.000 Hz
F490 0.000 Hz
F491 0.000 Hz
F492 0.000 Hz
F493 0.000 Hz
F494 0.000 Hz
F495 0.000 Hz
F496 0.000 Hz
F497 0.000 Hz
F498 0.000 Hz
F499 0.000 Hz
F500 0.000 Hz
F501 0.000 Hz
F502 0.000 Hz
F503 0.000 Hz
F504 0.000 Hz
F505 0.000 Hz
F506 0.000 Hz
F507 0.000 Hz
F508 0.000 Hz
F509 0.000 Hz
F510 0.000 Hz
F511 0.000 Hz
F512 0.000 Hz
F513 0.000 Hz
F514 0.000 Hz
F515 0.000 Hz
F516 0.000 Hz
F517 0.000 Hz
F518 0.000 Hz
F519 0.000 Hz
F520 0.000 Hz
F521 0.000 Hz
F522 0.000 Hz
F523 0.000 Hz
F524 0.000 Hz
F525 0.000 Hz
F526 0.000 Hz
F527 0.000 Hz
F528 0.000 Hz
F529 0.000 Hz
F530 0.000 Hz
F531 0.000 Hz
F532 0.000 Hz
F533 0.000 Hz
F534 0.000 Hz
F535 0.000 Hz
F536 0.000 Hz
F537 0.000 Hz
F538 0.000 Hz
F539 0.000 Hz
F540 0.000 Hz
F541 0.000 Hz
F542 0.000 Hz
F543 0.000 Hz
F544 0.000 Hz
F545 0.000 Hz
F546 0.000 Hz
F547 0.000 Hz
F548 0.000 Hz
F549 0.000 Hz
F550 0.000 Hz
F551 0.000 Hz
F552 0.000 Hz
F553 0.000 Hz
F554 0.000 Hz
F555 0.000 Hz
F556 0.000 Hz
F557 0.000 Hz
F558 0.000 Hz
F559 0.000 Hz
F560 0.000 Hz
F561 0.000 Hz
F562 0.000 Hz
F563 0.000 Hz
F564 0.000 Hz
F565 0.000 Hz
F566 0.000 Hz
F567 0.000 Hz
F568 0.000 Hz
F569 0.000 Hz
F570 0.000 Hz
F571 0.000 Hz
F572 0.000 Hz
F573 0.000 Hz
F574 0.000 Hz
F575 0.000 Hz
F576 0.000 Hz
F577 0.000 Hz
F578 0.000 Hz
F579 0.000 Hz
F580 0.000 Hz
F581 0.000 Hz
F582 0.000 Hz
F583 0.000 Hz
F584 0.000 Hz
F585 0.000 Hz
F586 0.000 Hz
F587 0.000 Hz
F588 0.000 Hz
F589 0.000 Hz
F590 0.000 Hz
F591 0.000 Hz
F592 0.000 Hz
F593 0.000 Hz
F594 0.000 Hz
F595 0.000 Hz
F596 0.000 Hz
F597 0.000 Hz
F598 0.000 Hz
F599 0.000 Hz
F600 0.000 Hz
F601 0.000 Hz
F602 0.000 Hz
F603 0.000 Hz
F604 0.000 Hz
F605 0.000 Hz
F606 0.000 Hz
F607 0.000 Hz
F608 0.000 Hz
F609 0.000 Hz
F610 0.000 Hz
F611 0.000 Hz
F612 0.000 Hz
F613 0.000 Hz
F614 0.000 Hz
F615 0.000 Hz
F616 0.000 Hz
F617 0.000 Hz
F618 0.000 Hz
F619 0.000 Hz
F620 0.000 Hz
F621 0.000 Hz
F622 0.000 Hz
F623 0.000 Hz
F624 0.000 Hz
F625 0.000 Hz
F626 0.000 Hz
F627 0.000 Hz
F628 0.000 Hz
F629 0.000 Hz
F630 0.000 Hz
F631 0.000 Hz
F632 0.000 Hz
F633 0.000 Hz
F634 0.000 Hz
F635 0.000 Hz
F636 0.000 Hz
F637 0.000 Hz
F638 0.000 Hz
F639 0.000 Hz
F640 0.000 Hz
F641 0.000 Hz
F642 0.000 Hz
F643 0.000 Hz
F644 0.000 Hz
F645 0.000 Hz
F646 0.000 Hz
F647 0.000 Hz
F648 0.000 Hz
F649 0.000 Hz
F650 0.000 Hz
F651 0.000 Hz
F652 0.000 Hz
F653 0.000 Hz
F654 0.000 Hz
F655 0.000 Hz
F656 0.000 Hz
F657 0.000 Hz
F658 0.000 Hz
F659 0.000 Hz
F660 0.000 Hz
F661 0.000 Hz
F662 0.000 Hz
F663 0.000 Hz
F664 0.000 Hz
F665 0.000 Hz
F666 0.000 Hz
F667 0.000 Hz
F668 0.000 Hz
F669 0.000 Hz
F670 0.000 Hz
F671 0.000 Hz
F672 0.000 Hz
F673 0.000 Hz
F674 0.000 Hz
F675 0.000 Hz
F676 0.000 Hz
F677 0.000 Hz
F678 0.000 Hz
F679 0.000 Hz
F680 0.000 Hz
F681 0.000 Hz
F682 0.000 Hz
F683 0.000 Hz
F684 0.000 Hz
F685 0.000 Hz
F686 0.000 Hz
F687 0.000 Hz
F688 0.000 Hz
F689 0.000 Hz
F690 0.000 Hz
F691 0.000 Hz
F692 0.000 Hz
F693 0.000 Hz
F694 0.000 Hz
F695 0.000 Hz
F696 0.000 Hz
F697 0.000 Hz
F698 0.000 Hz
F699 0.000 Hz
F700 0.000 Hz
F701 0.000 Hz
F702 0.000 Hz
F703 0.000 Hz
F704 0.000 Hz
F705 0.000 Hz
F706 0.000 Hz
F707 0.000 Hz
F708 0.000 Hz
F709 0.000 Hz
F710 0.000 Hz
F711 0.000 Hz
F712 0.000 Hz
F713 0.000 Hz
F714 0.000 Hz
F715 0.000 Hz
F716 0.000 Hz
F717 0.000 Hz
F718 0.000 Hz
F719 0.000 Hz
F720 0.000 Hz
F721 0.000 Hz
F722 0.000 Hz
F723 0.000 Hz
F724 0.000 Hz
F725 0.000 Hz
F726 0.000 Hz
F727 0.000 Hz
F728 0.000 Hz
F729 0.000 Hz
F730 0.000 Hz
F731 0.000 Hz
F732 0.000 Hz
F733 0.000 Hz
F734 0.000 Hz
F735 0.000 Hz
F736 0.000 Hz
F737 0.000 Hz
F738 0.000 Hz
F739 0.000 Hz
F740 0.000 Hz
F741 0.000 Hz
F742 0.000 Hz
F743 0.000 Hz
F744 0.000 Hz
F745 0.000 Hz
F746 0.000 Hz
F747 0.000 Hz
F748 0.000 Hz
F749 0.000 Hz
F750 0.000 Hz
F751 0.000 Hz
F752 0.000 Hz
F753 0.000 Hz
F754 0.000 Hz
F755 0.000 Hz
F756 0.000 Hz
F757 0.000 Hz
F758 0.000 Hz
F759 0.000 Hz
F760 0.000 Hz
F761 0.000 Hz
F762 0.000 Hz
F763 0.000 Hz
F764 0.000 Hz
F765 0.000 Hz
F766 0.000 Hz
F767 0.000 Hz
F768 0.000 Hz
F769 0.000 Hz
F770 0.000 Hz
F771 0.000 Hz
F772 0.000 Hz
F773 0.000 Hz
F774 0.000 Hz
F775 0.000 Hz
F776 0.000 Hz
F777 0.000 Hz
F778 0.000 Hz
F779 0.000 Hz
F780 0.000 Hz
F781 0.000 Hz
F782 0.000 Hz
F783 0.000 Hz
F784 0.000 Hz
F785 0.000 Hz
F786 0.000 Hz
F787 
```

H-(Abc<sup>2K</sup>)<sub>4</sub>-NH<sub>2</sub> TFA salt **9d**  
Analytical RP-HPLC chromatograph and mass spectrum (ESI-MS)

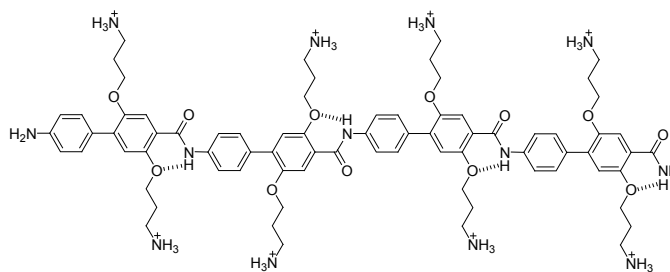

(a) Analytical RP-HPLC (5-50% acetonitrile with 0.1% TFA over 20 min,  $\lambda = 214$ )

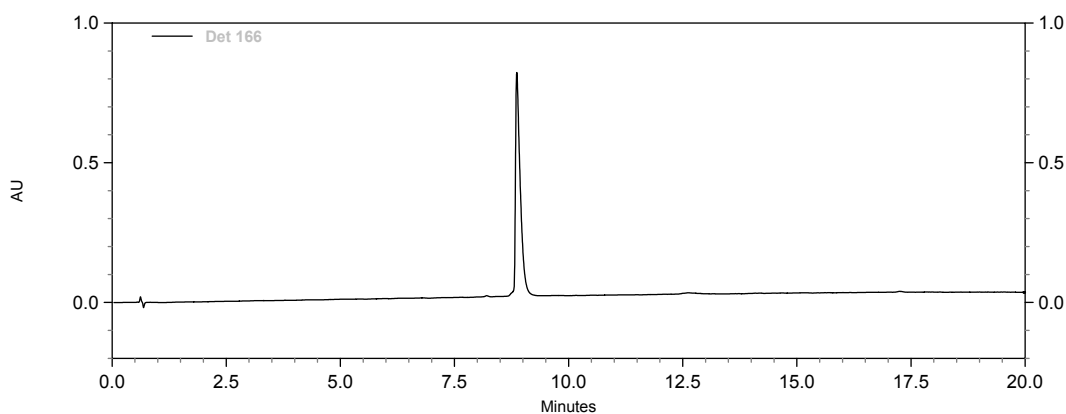

(b) ESI Mass spectrum. (Calcd exact mass for C<sub>76</sub>H<sub>95</sub>N<sub>13</sub>O<sub>12</sub> [M] = 1381.72)

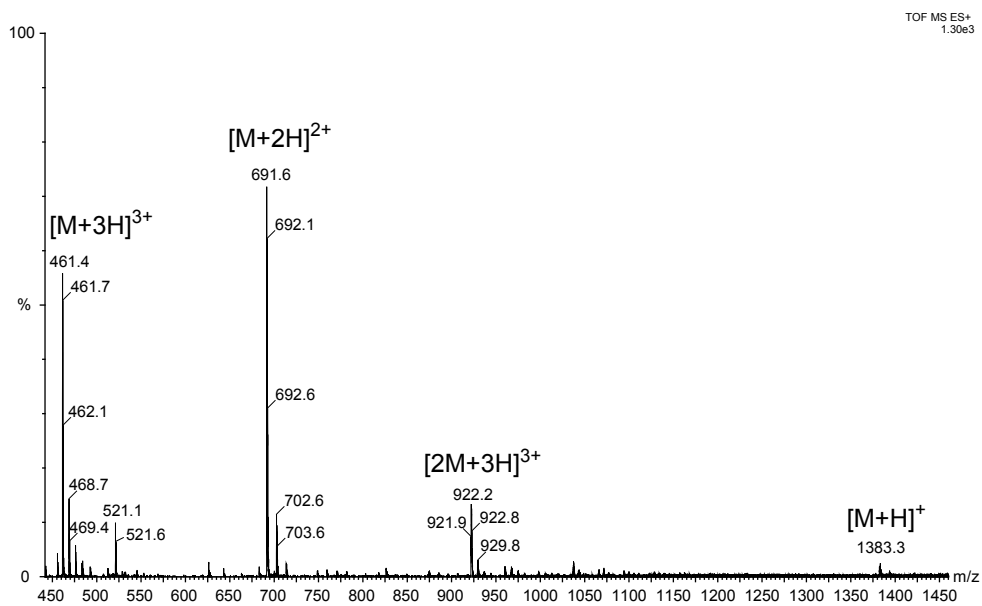



**<sup>1</sup>H NMR of Abc2k Tetramer H-(Abc2k)<sub>4</sub>-NH<sub>2</sub> (500 MHz, 298 K, D<sub>2</sub>O)**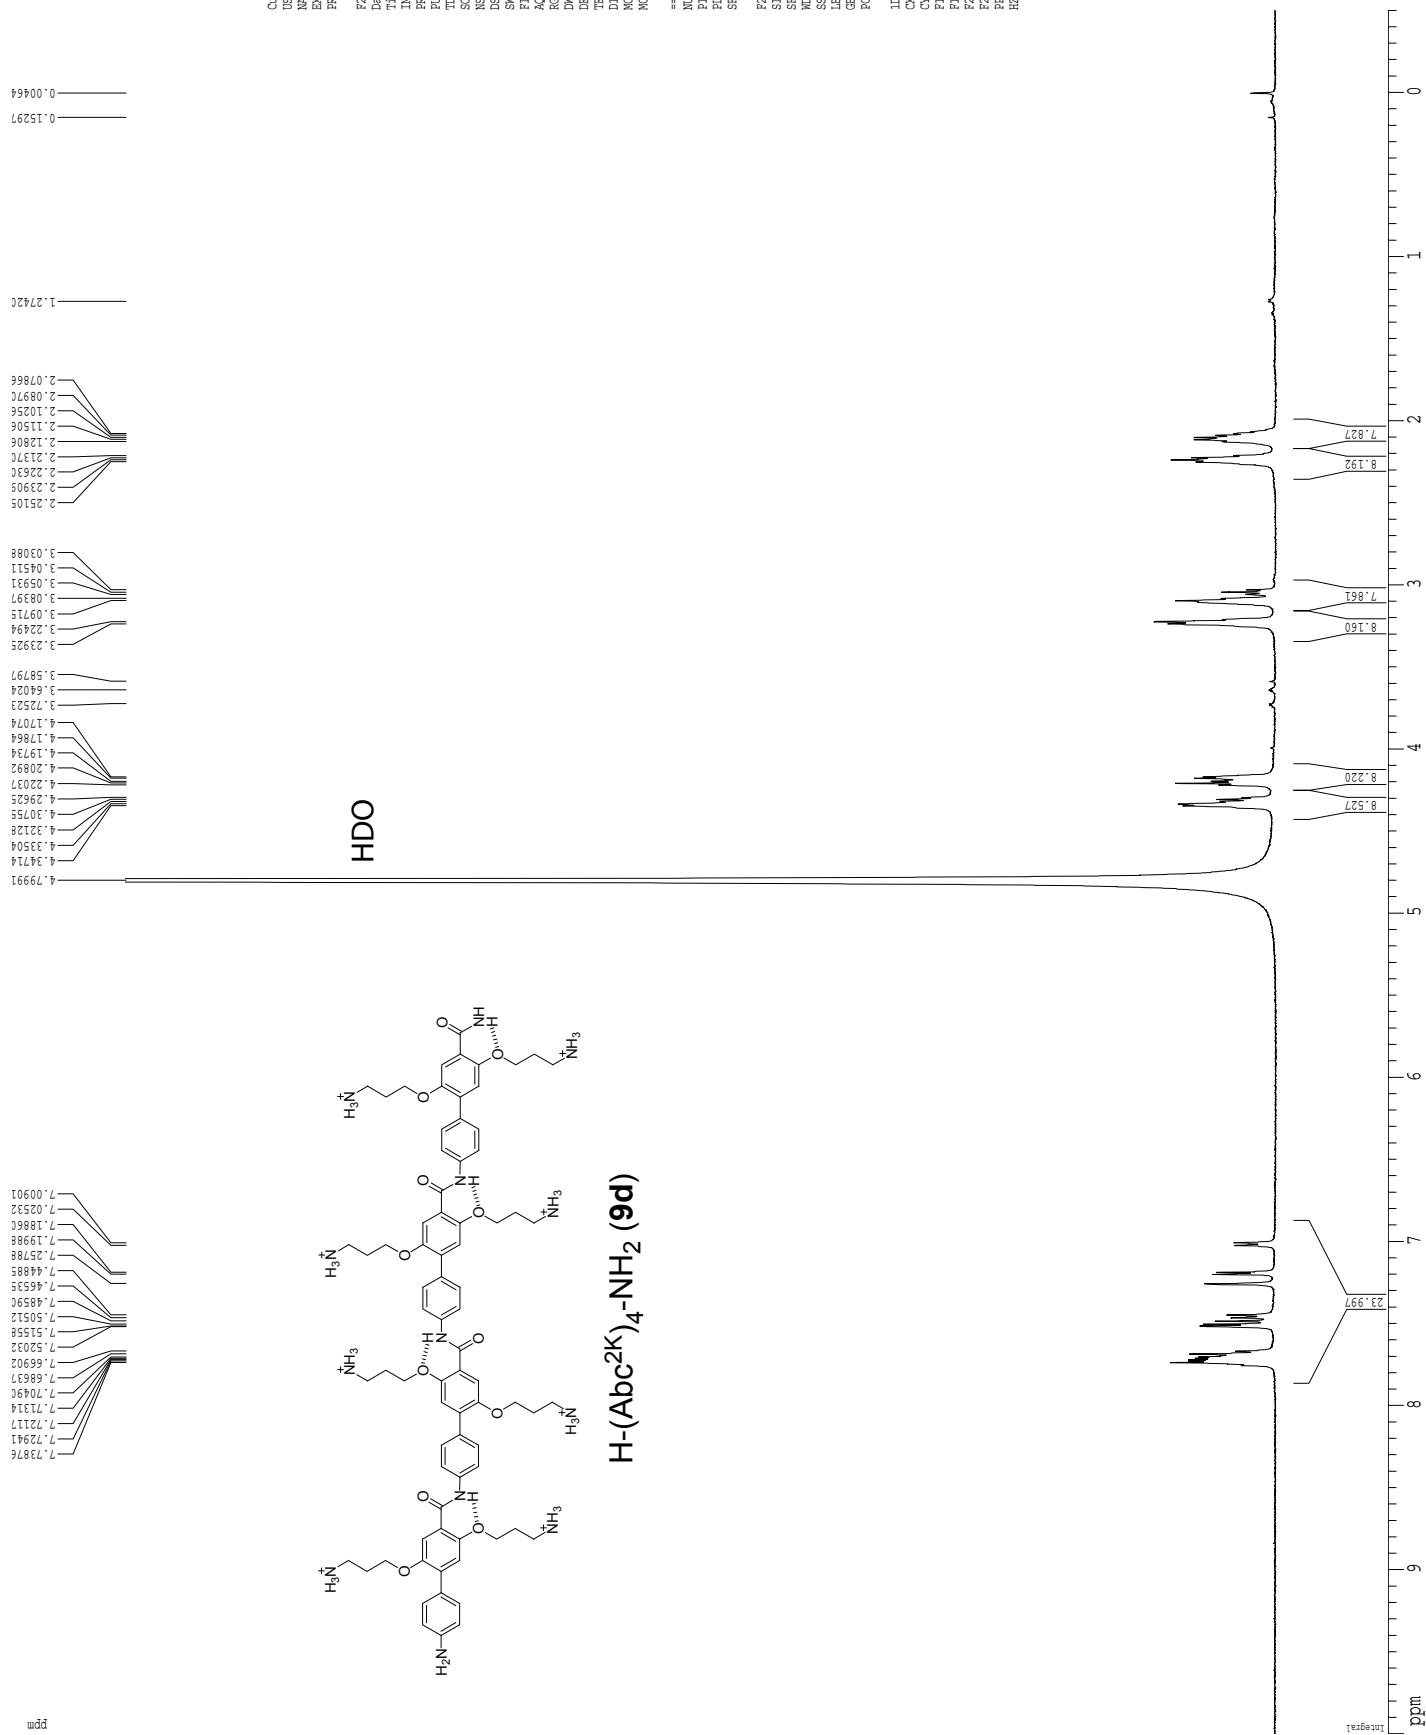

H-(Abc<sup>2K</sup>)<sub>5</sub>-NH<sub>2</sub> TFA salt **9e**  
Analytical RP-HPLC chromatograph and mass spectrum (ESI-MS)

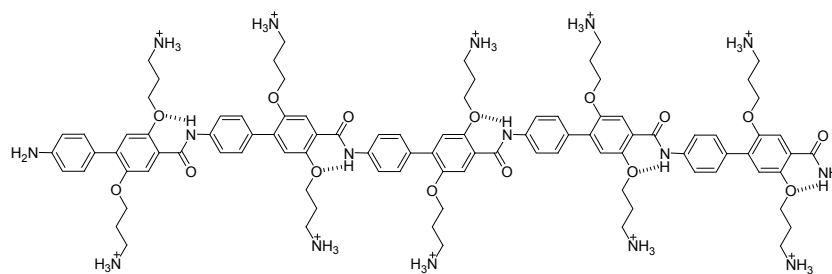

(a) Analytical RP-HPLC (5-50% acetonitrile with 0.1% TFA over 20 min,  $\lambda = 214$ )

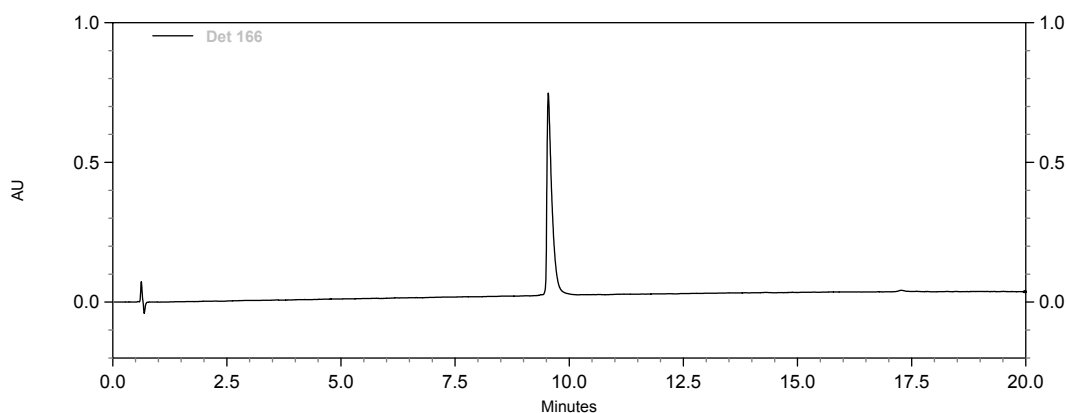

(b) ESI Mass spectrum. (Calcd exact mass for C<sub>95</sub>H<sub>118</sub>N<sub>16</sub>O<sub>15</sub> [M] = 1722.90)

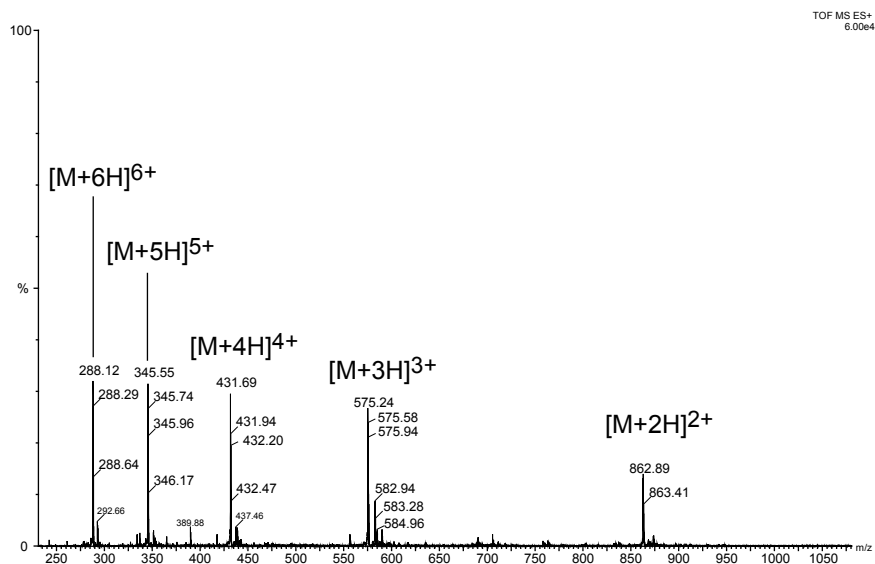

**<sup>1</sup>H NMR of Abc2K Pentamer H-(Abc2K)<sub>5</sub>-NH<sub>2</sub> (500 MHz, 298 K, D<sub>2</sub>O)**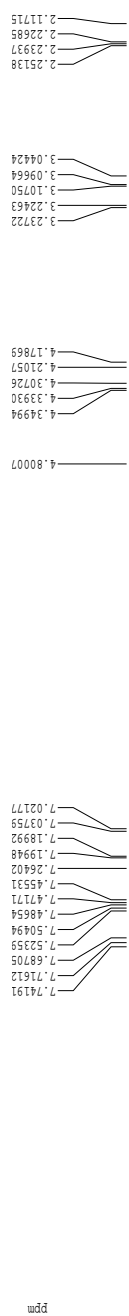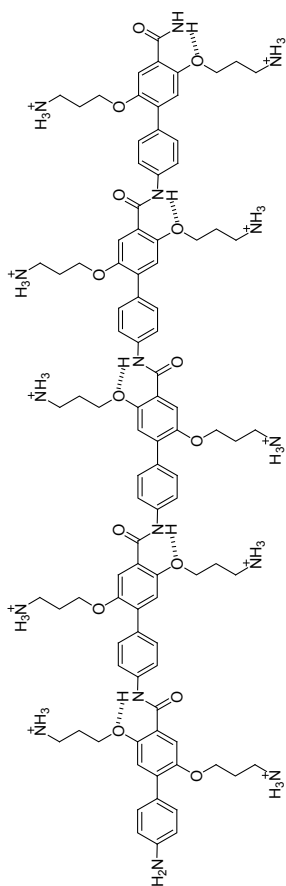**H-(Abc2K)<sub>5</sub>-NH<sub>2</sub> (9e)**

HDO

S43

```

Current Data Parameters
USER          cgocha
EXPNO        09-0-93
PROCNO       1
Date_         20050603
Time         21.30
INSTRUM      cryo500
PROBHD       5 mm CPTCI 1H-
PULPROG      zg30
TD           81728
SOLVENT      D2O
NS           128
DS           2
AQ           6013.827 Hz
SFO1         0.038043 Hz
NUC1          15N
NUC2          13C
F2           5.0398774 sec
RG           362
DM           62.400 usec
DE           6.00 usec
TE           298.0 K
D1           0.10000000 sec
ACQRES       0.00000000 sec
MORKK        0.01500000 sec

===== CHANNEL F1 =====
NUC1          1H
P1           8.00 usec
PC           0.00 usec
SFO1         500.2159015 MHz

F2 - Processing parameters
SI           65536
SF           500.2100061 MHz
WDW          EM
SSB          0
LB           0.30 Hz
GB           0
PC           4.00

1D NMR Plot parameters
X            327.50 cm
Y            327.50 cm
F1P          10.000 ppm
F2P          5002.10 Hz
P2P          -0.500 ppm
P1MCM        0.46653 ppm/cm
P2MCM        230.35988 Hz/cm
  
```

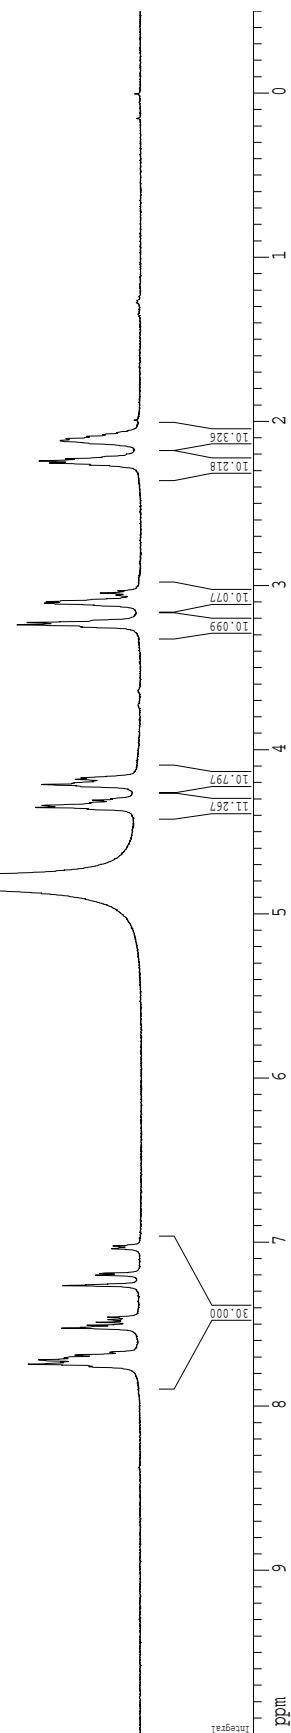

H-(Abc<sup>2K</sup>)<sub>6</sub>-NH<sub>2</sub> TFA salt **9f**  
Analytical RP-HPLC chromatograph and mass spectrum (ESI-MS)

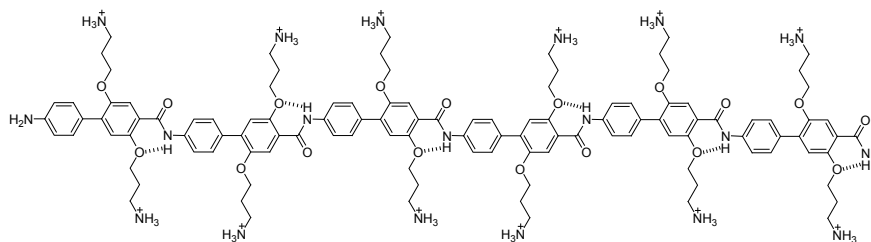

(a) Analytical RP-HPLC (5-50% acetonitrile with 0.1% TFA over 20 min,  $\lambda = 214$ )

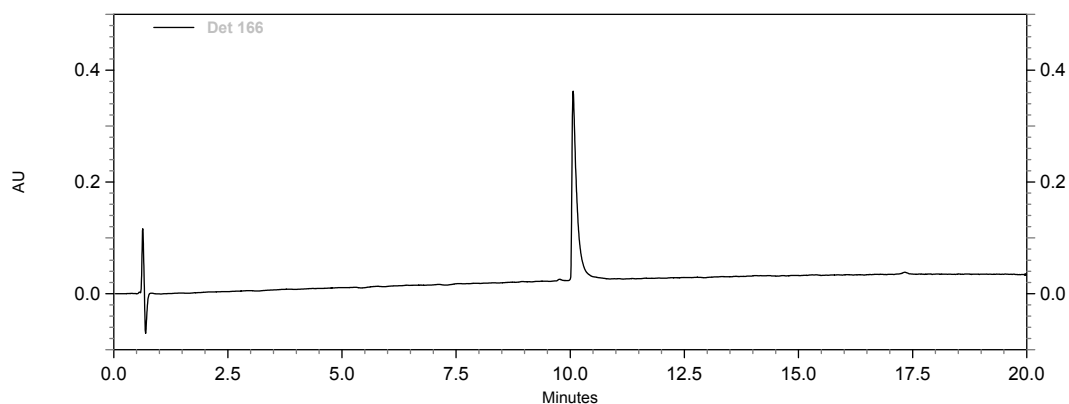

(b) ESI Mass spectrum. (Calcd exact mass for C<sub>114</sub>H<sub>141</sub>N<sub>19</sub>O<sub>18</sub> [M] = 2064.07)

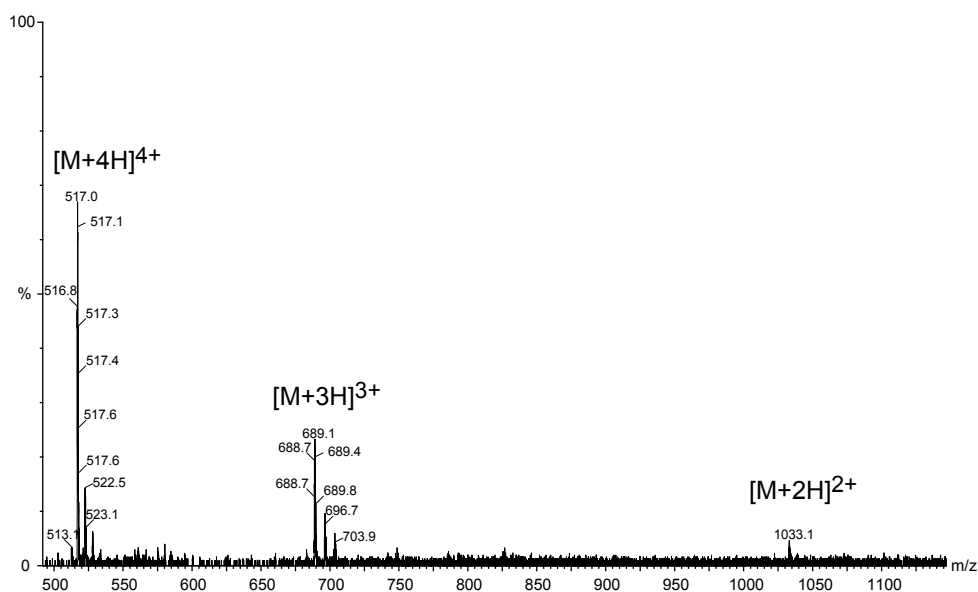

# <sup>1</sup>H NMR of Abc2K Hexamer H-(Abc2K)<sub>6</sub>-NH<sub>2</sub> (500 MHz, 298 K, D<sub>2</sub>O)

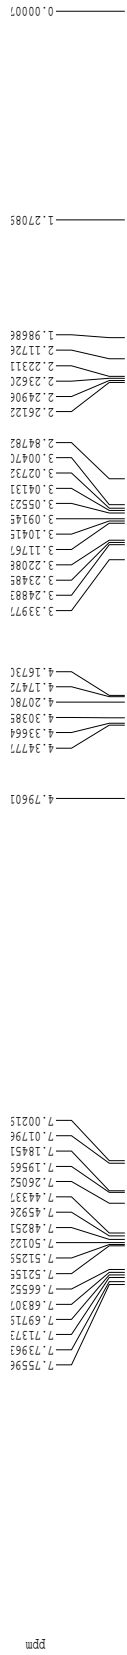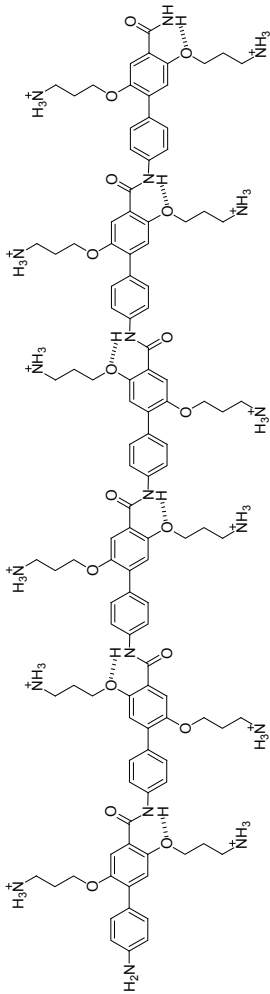

H-(Abc2K)<sub>6</sub>-NH<sub>2</sub> (9f)

H<sub>2</sub>O

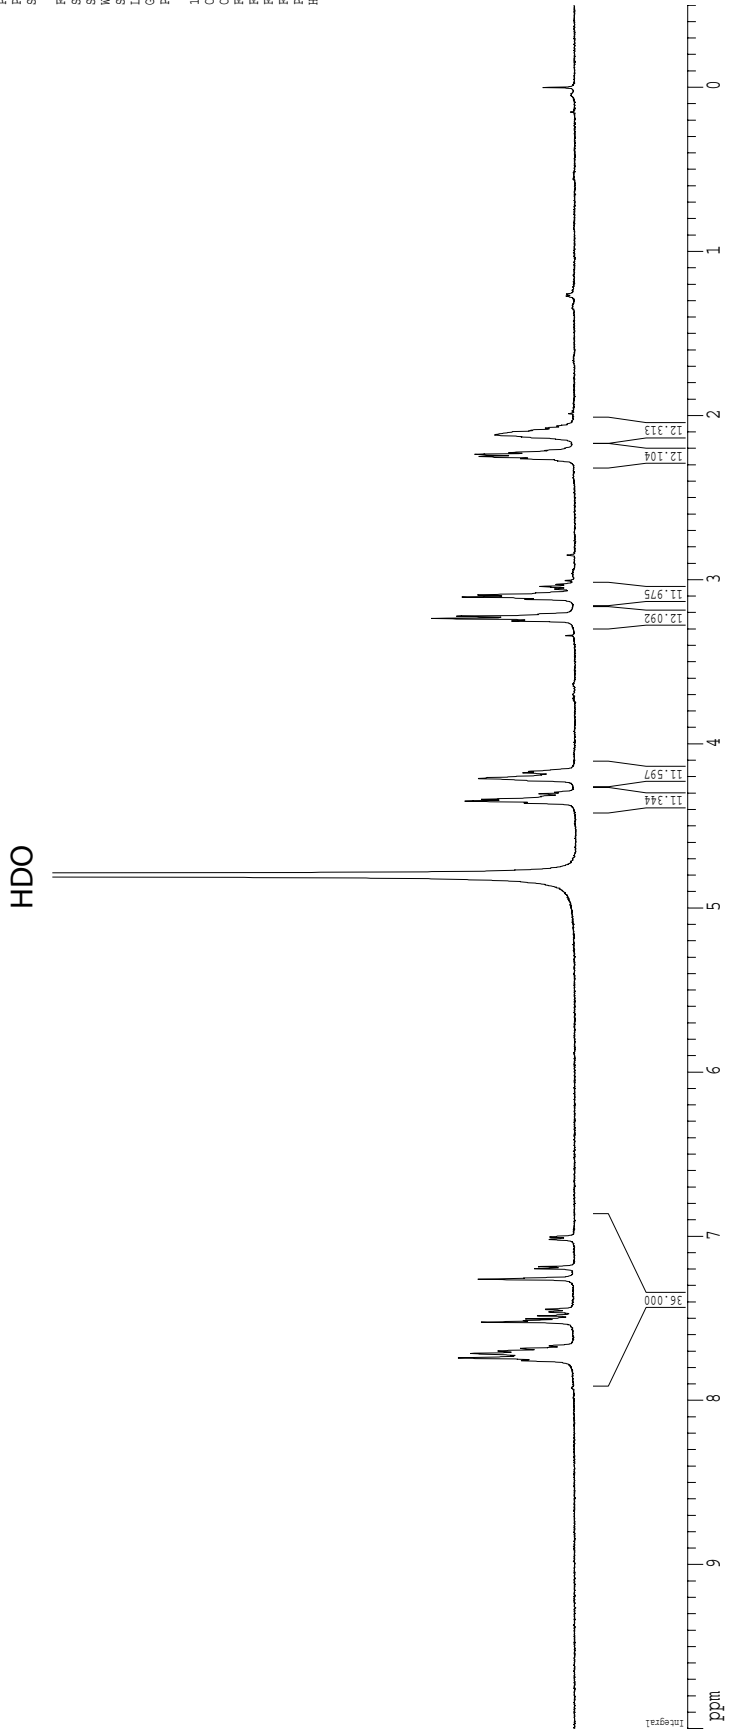

Current Data Parameters  
USER cgotha  
NAME c9-6-24  
EXPNO 4  
PROCNO 1

F2 - Acquisition Parameters  
Date\_ 20091001  
Time 12.05  
INSTRUM cryo60  
PROBHD 5 mm CPYCT 1H-  
PULPROG zgpg30  
TD 81728  
SOLVENT D2O  
NS 32  
DS 2  
SWH 8012.820 Hz  
FIDRES 0.098043 Hz  
AQ 5.098774 sec  
RG 228.1  
W 62.400 usec  
DE 0.0 usec  
TE 298.0  
D1 0.10000000 sec  
MCREST 0.00000000 sec  
MCREK 0.01500000 sec

\*\*\*\*\* CHANNEL f1 \*\*\*\*\*  
NUC1 1H  
P1 8.00 usec  
PL1 1.60 dB  
SFO1 500.135015 MHz

F2 - Processing parameters  
SI 6536  
SF 500.130000 MHz  
WDW EM  
SSB 0  
LB 0.30 Hz  
GB 0  
PC 4.00

ID NMR plot parameters  
CX 22.80 cm  
CY 354.39 cm  
FIP 10.000 ppm  
FL 5002.10 Hz  
FPP -0.500 ppm  
GAMMA 0.4613 Hz/cm  
HZCON 230.35989 Hz/cm

H-(Abc<sup>2K</sup>)<sub>7</sub>-NH<sub>2</sub> TFA salt **9g**  
Analytical RP-HPLC chromatograph and mass spectrum (ESI-MS)

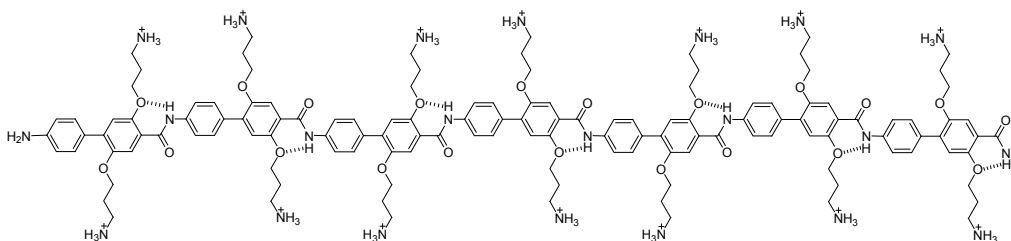

(a) Analytical RP-HPLC (5-50% acetonitrile with 0.1% TFA over 20 min,  $\lambda = 214$ )

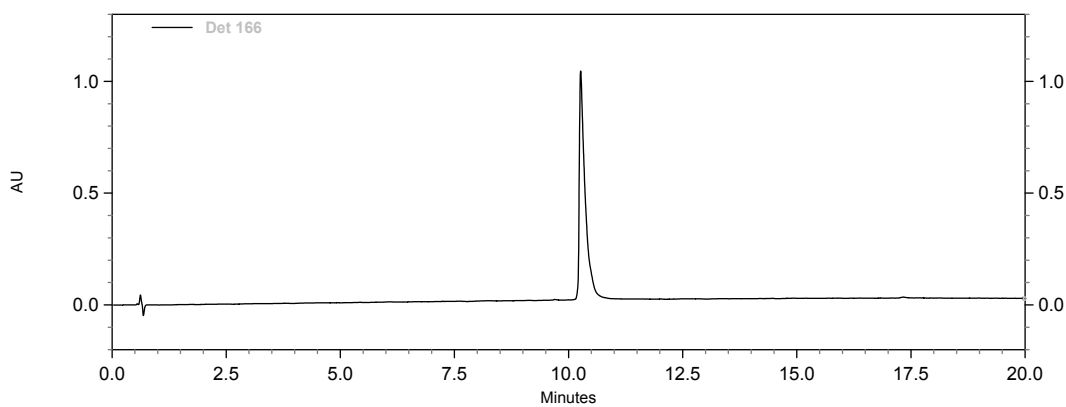

(b) ESI Mass spectrum. (Calcd exact mass for C<sub>133</sub>H<sub>164</sub>N<sub>22</sub>O<sub>21</sub> [M] = 2405.24)

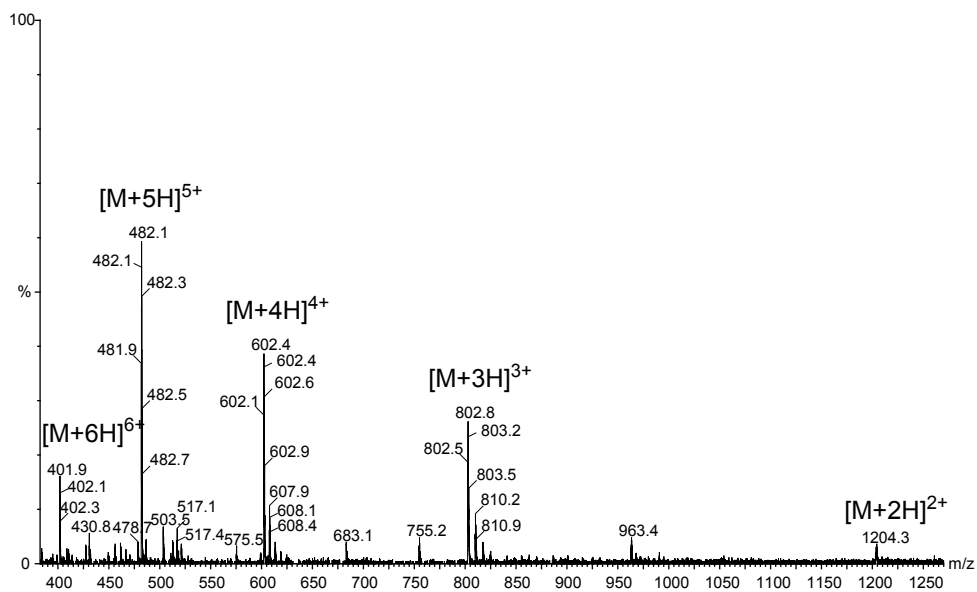

# <sup>1</sup>H NMR of Abc2K Heptamer H-(Abc2K)<sub>7</sub>-NH<sub>2</sub> (500 MHz, 298 K, D<sub>2</sub>O)

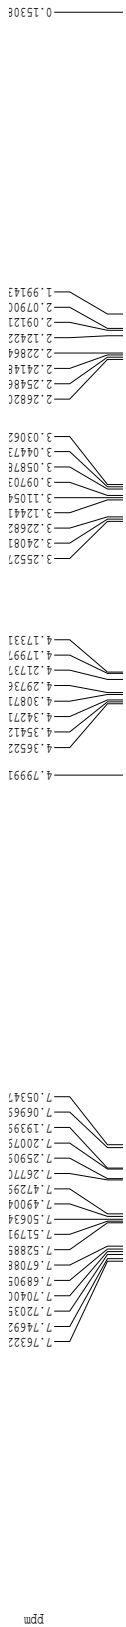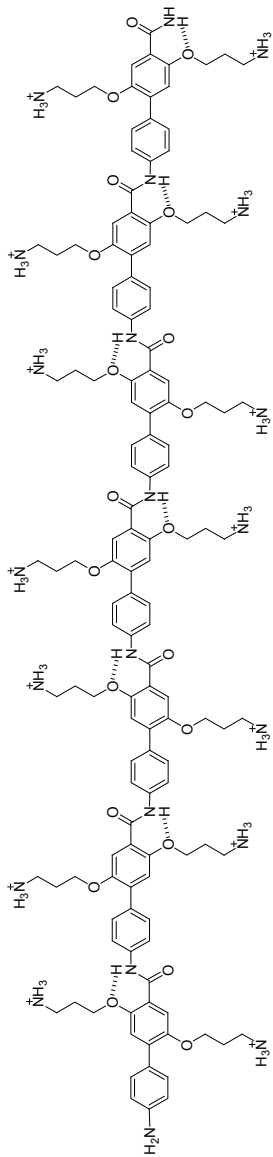

H-(Abc2K)<sub>7</sub>-NH<sub>2</sub> (9g)

HDO

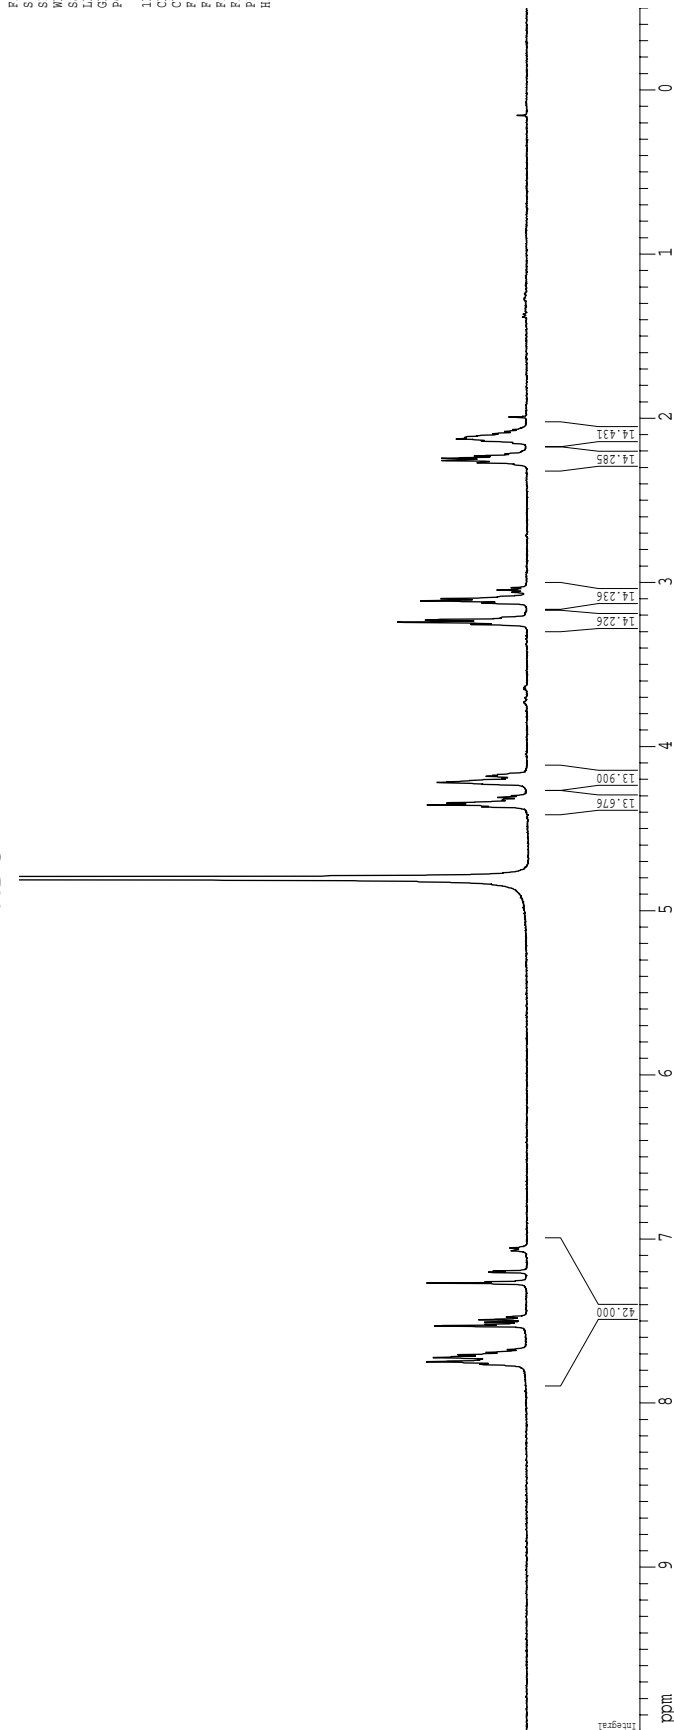

## Supporting Information

Current Data Parameters  
 USER cgotla  
 NAME C3-6-90  
 EXPNO 1  
 PROCNO 1

F2 - Acquisition Parameters  
 Date\_ 20050601  
 Time 23.18  
 TIME 00:05:09  
 PULPROG zgpg30  
 PROGRAM 5 mm CFCZ-HZ  
 PULPROG zgpg30  
 TD 81728  
 SOLVENT D2O  
 NS 150  
 DS 2  
 SWH 8012.820 Hz  
 FIDRES 0.098043 Hz  
 AQ 5.0989774 sec  
 RG 362  
 DW 62.400 usec  
 DE 6.00 usec  
 TE 298.0 K  
 D1 0.10000000 sec  
 D11 0.00000000 sec  
 ACQRES 0.00000000 sec  
 MCKEY 0.00000000 sec  
 MCKEY 0.01500000 sec

===== CHANNEL f1 =====  
 NUCL1 1H  
 P1 8.00 usec  
 PL1 1.60 dB  
 SFO1 500.2135015 MHz

F2 - Processing parameters  
 S1 655.36  
 SF 500.2100062 MHz  
 IQ 0  
 SSB 0  
 LB 0.30 Hz  
 GB 0  
 PC 4.00

1D NMR plot parameters  
 CX 22.80 cm  
 CY 575.93 cm  
 F1P 10.000 ppm  
 F1 5002.10 Hz  
 F2P -0.500 ppm  
 F2 -250.10 Hz  
 FFRONT 0.46053 ppm/cm  
 HZCM 230.35988 Hz/cm

C. Gothard, J. S. Nowick

H-(Abc<sup>2K</sup>)<sub>8</sub>-NH<sub>2</sub> TFA salt **9h**  
Analytical RP-HPLC chromatograph and mass spectrum (ESI-MS)

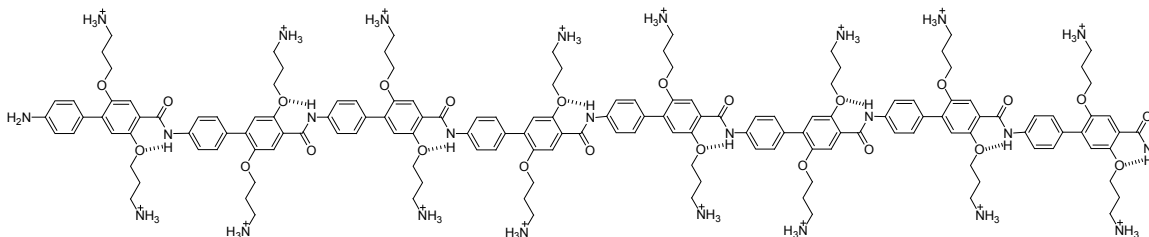

(a) Analytical RP-HPLC (5-50% acetonitrile with 0.1% TFA over 20 min,  $\lambda = 214$ )

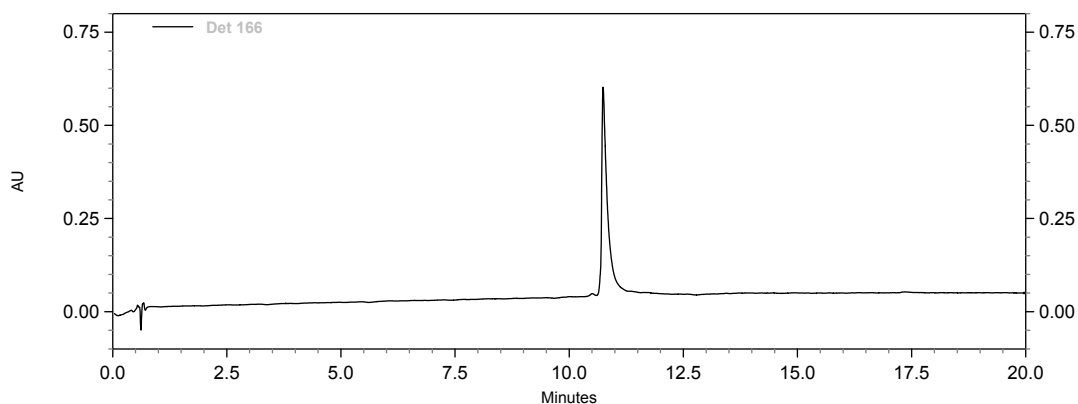

(b) ESI Mass spectrum. (Calcd mass for C<sub>152</sub>H<sub>187</sub>N<sub>25</sub>O<sub>24</sub> [M] = 2746.42)

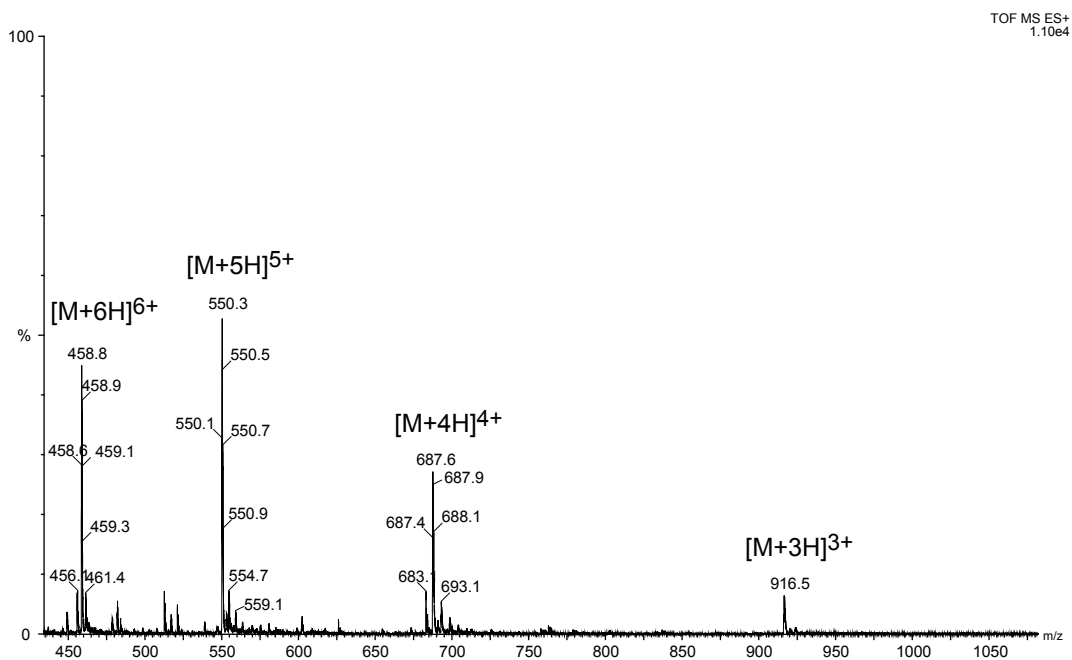



**$^1\text{H}$  NMR of Abc<sup>2k</sup> Octamer H-(Abc<sup>2k</sup>)<sub>8</sub>-NH<sub>2</sub> (500 MHz, 298 K, D<sub>2</sub>O)**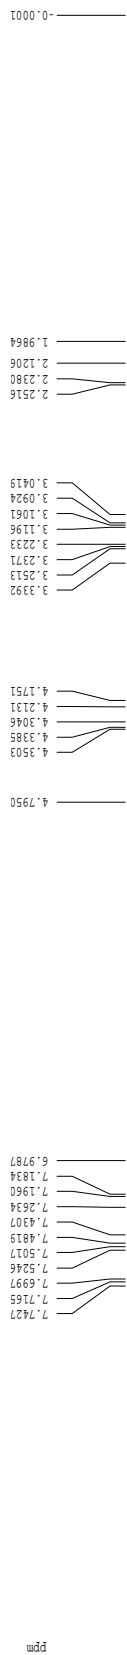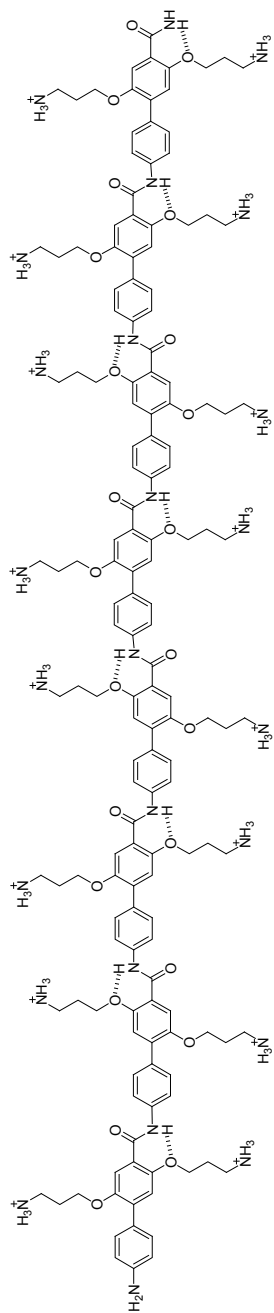**H-(Abc<sup>2k</sup>)<sub>8</sub>-NH<sub>2</sub> (9h)**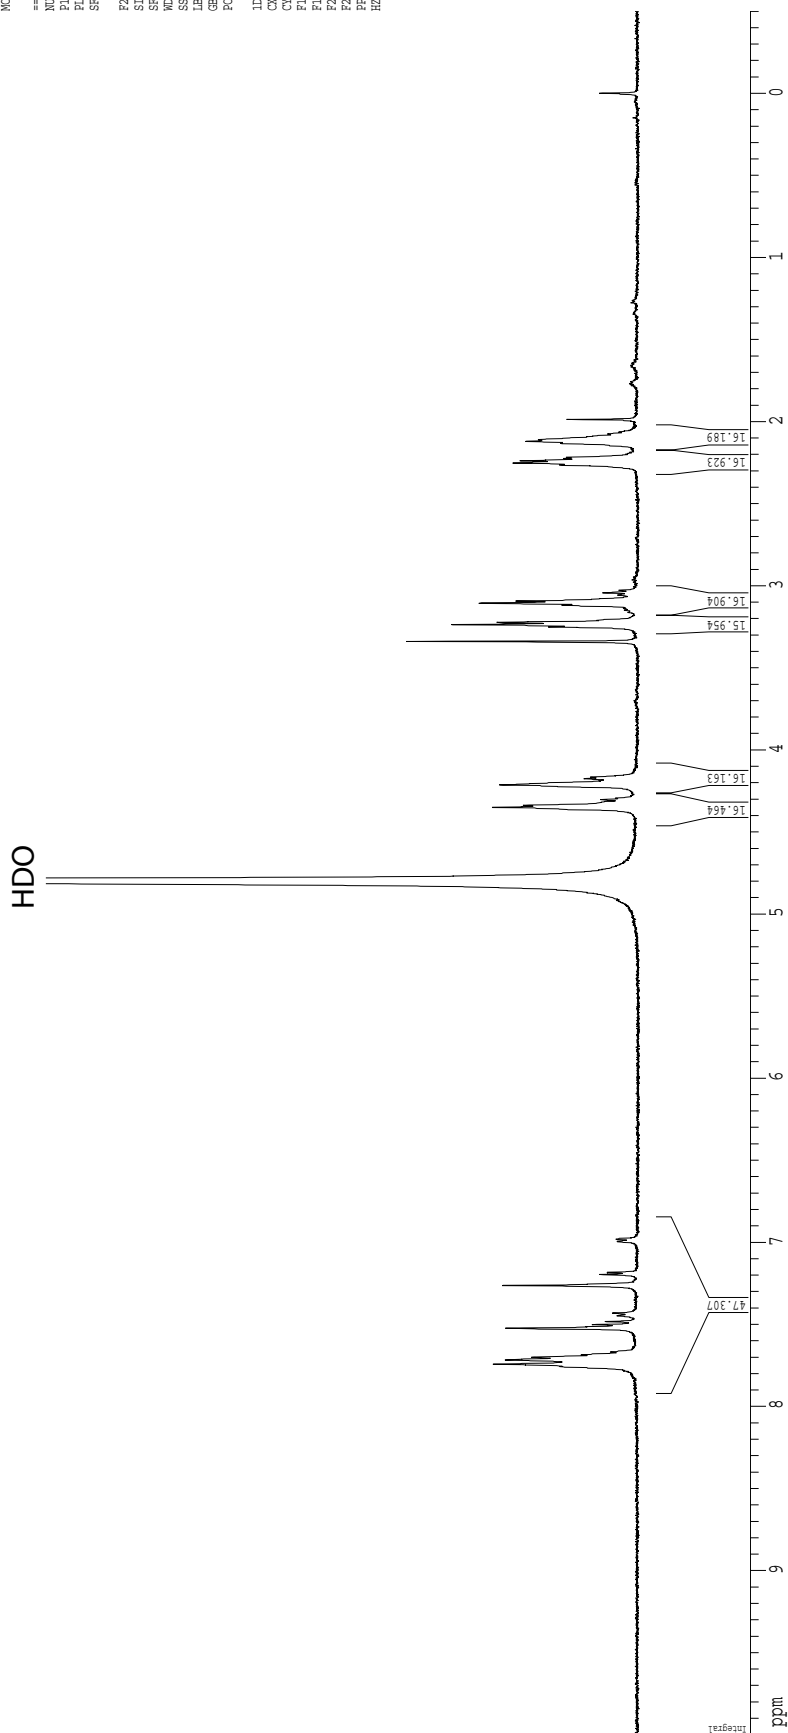

Current Data Parameters  
 USER cgocha  
 NAME c9-6-92  
 EXFO 2  
 PROCNO 1

F2 - Acquisition Parameters  
 Date\_ 20050602  
 Time 20.43  
 INSTRUM cty500  
 PROBRD 5 mm CPTCI JH-  
 PULPROG zgpg30  
 TD 65536  
 SFO1 500.135015 MHz  
 SOLVENT D2O  
 NS 64  
 DS 2  
 SWH 8012.820 Hz  
 FIDRES 0.098643 Hz  
 AQ 5.0998774 sec  
 RG 228.1  
 DW 62.400 usec  
 DE 6.00  
 TE 298.0 K  
 DL 0.1000000 sec  
 ACQST 0.6000000 sec  
 MCWK 0.0150000 sec

===== CHANNEL f1 =====  
 NUC1 1H  
 P1 8.00 usec  
 PL1 1.60 dB  
 SFO1 500.21135015 MHz

F2 - Processing parameters  
 SI 65536  
 SF 500.210083 MHz  
 EN  
 DS 0  
 SSB 0  
 LB 0  
 GB 0  
 CB 0  
 PC 4.00

ID NMR plot parameters  
 CX 22.80 cm  
 CY 528.20 cm  
 F1P 10.400 ppm  
 F1 5002.10 Hz  
 F2P -0.500 ppm  
 F2 -250.11 Hz  
 PPMCM 0.46053 ppm/cm  
 HZCM 230.35989 Hz/cm

H-(Abc<sup>2K</sup>)<sub>10</sub>-NH<sub>2</sub> TFA salt **9i**  
Analytical RP-HPLC chromatograph and mass spectrum (ESI-MS)

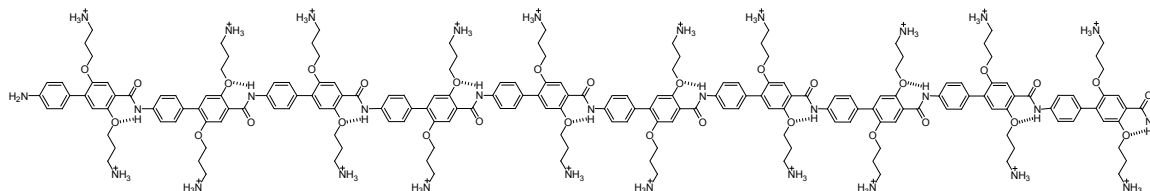

(a) Analytical RP-HPLC (5-50% acetonitrile with 0.1% TFA over 10 min,  $\lambda = 214$ )

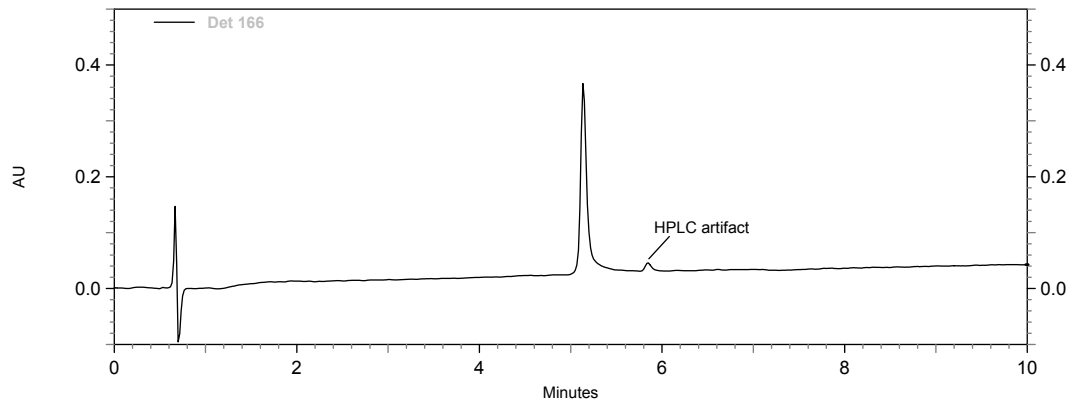

(b) ESI Mass spectrum. (Calcd exact mass for C<sub>190</sub>H<sub>233</sub>N<sub>31</sub>O<sub>30</sub> [M] = 3428.77)

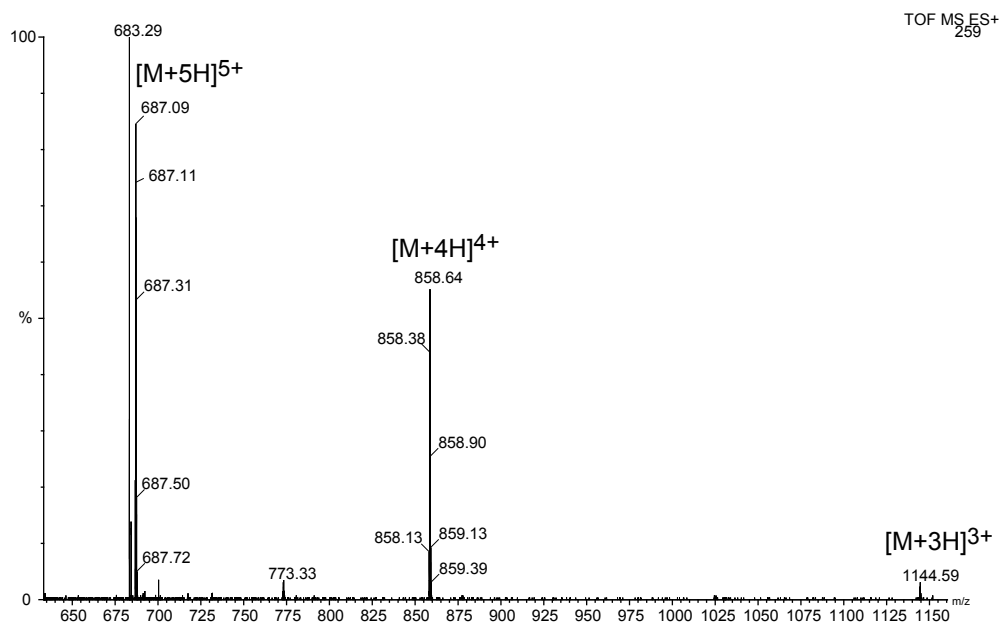

# <sup>1</sup>H NMR of Abc2K Decamer H-(Abc2K)<sub>10</sub>-NH<sub>2</sub> (500 MHz, 298 K, D<sub>2</sub>O)

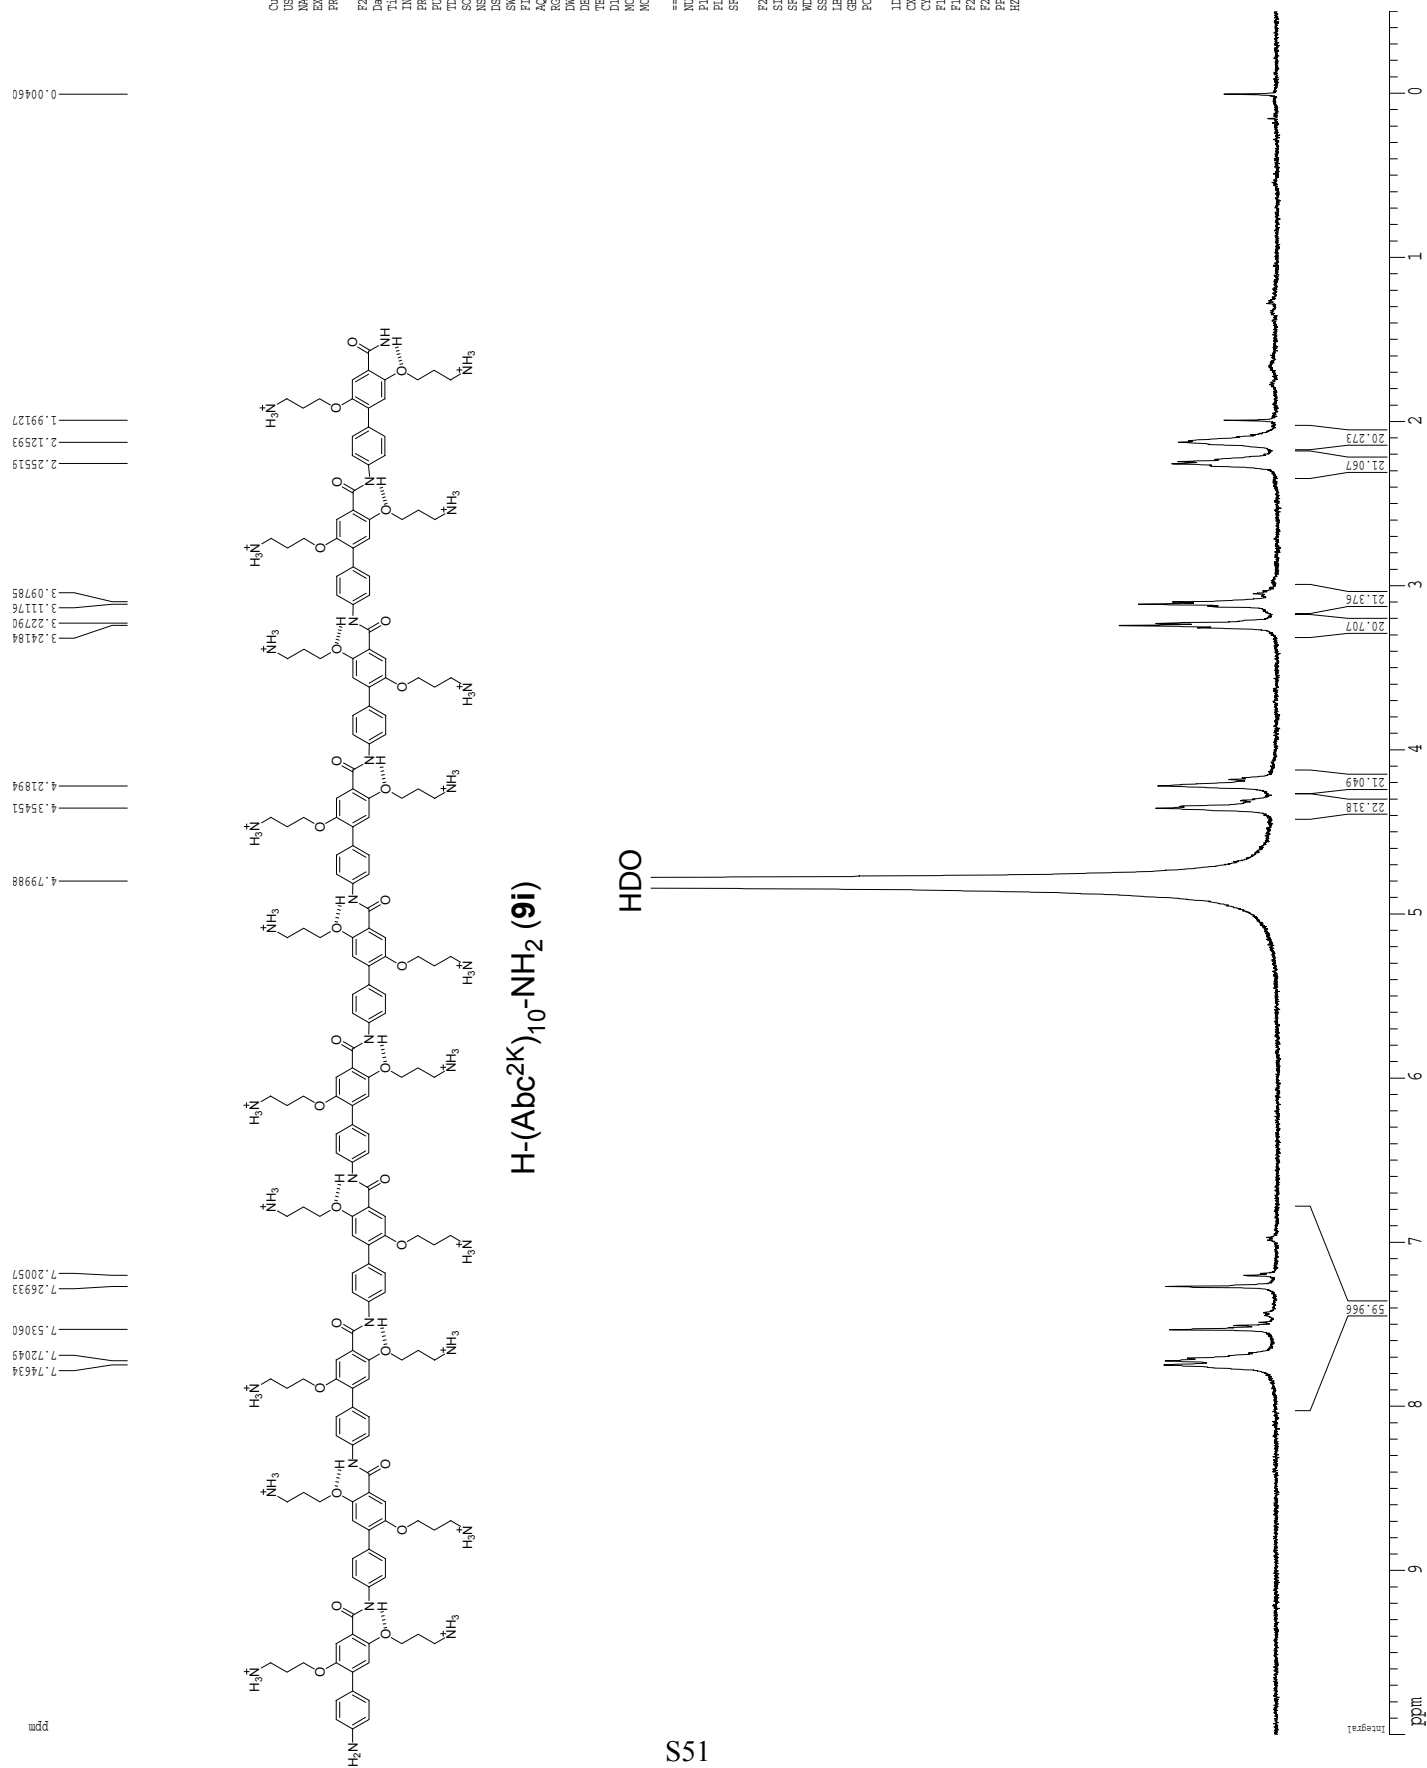

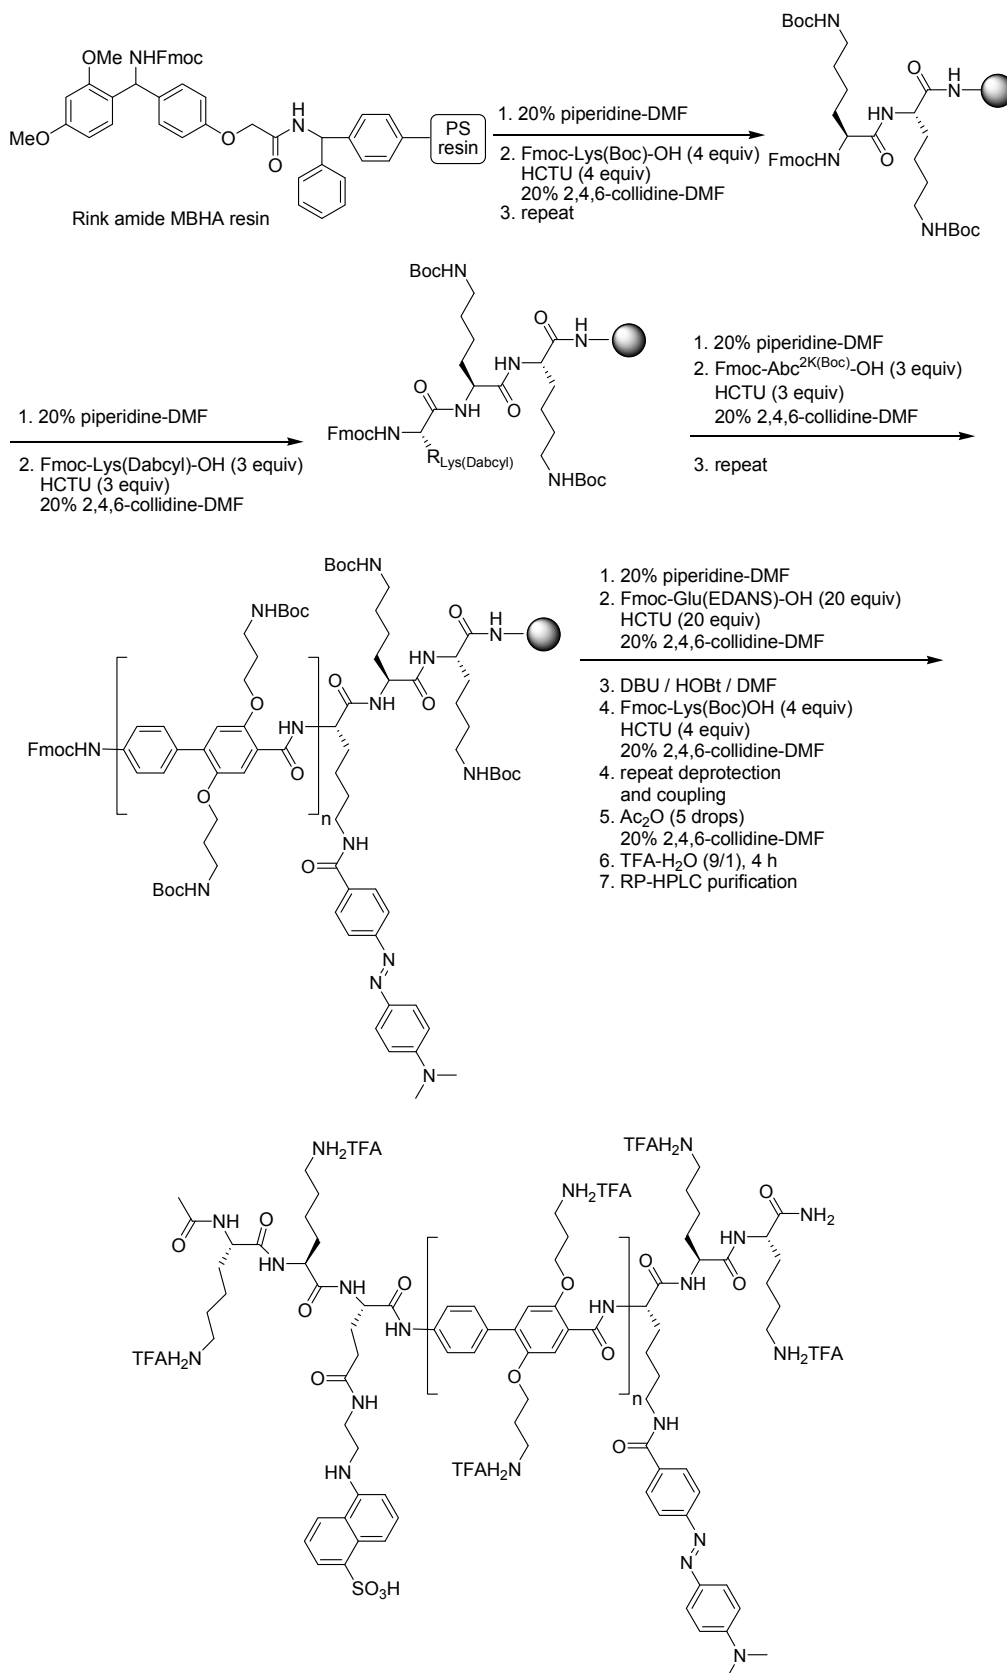

**Synthesis of  $\text{Abc}^{2\text{K}}$  Oligomers 10a-10j:**  $\text{Ac-(Lys)}_2\text{-Glu(EDANS)-(Abc}^{2\text{K}})_n\text{-Lys(DabcyI)-(Lys)}_2\text{-NH}_2$  ( $n=1-10$ ). Rink amide MBHA resin (74 mg, 0.34 mmol/g, Novabiochem) contained in Bio-Rad Poly-Prep chromatography column was soaked in  $\text{CH}_2\text{Cl}_2$  for 15 min and then washed with DMF ( $3 \times$  ca. 5 mL, 1 min each). Fmoc deprotection was carried out using a solution of 20% piperidine–DMF ( $1 \times$  ca. 5 mL for 1 min,  $1 \times$  ca. 5 mL for 20 min). Solutions were mixed with the resin by capping the column on both ends, and slowly agitating the column. Solutions were drained from the column using nitrogen pressure. After Fmoc deprotections, the resin was washed with DMF ( $6 \times$  ca. 5 mL, 1 min each) and then  $\text{CH}_2\text{Cl}_2$   $6 \times$  ca. 5 mL, 1 min each). Lysine residues were coupled to the resin by pre-activating Fmoc-Lys(Boc)-OH (47 mg, 0.10 mmol) with HCTU (41 mg, 0.10 mmol) in ca. 0.5 mL of 20% 2,4,6-collidine for 1 min and then adding the resultant solution to the resin and gently agitating the resin for ca. 2 h. Lysine couplings were determined to be complete by use of the ninhydrin test. Lys(DabcyI) residues were coupled to the resin by dissolving Fmoc-Lys(DabcyI)-OH (31 mg, 0.050 mmol) and HCTU (21 mg, 0.05 mmol) in ca. 0.5 mL of 20% 2,4,6-collidine–DMF, adding the resultant solution to the resin, and then gently agitating the resin for 6–12 h.  $\text{Abc}^{2\text{K}}$  residues were coupled to the resin by pre-activating Fmoc- $\text{Abc}^{2\text{K(Boc)}}$ -OH (59 mg, 0.075 mmol) with HCTU (31 mg, 0.075 mmol) in ca. 0.5 mL of 20% 2,4,6-collidine–DMF. The coupling solution was then added to the resin and gently agitated for ca. 12 h. To determine if  $\text{Abc}^{2\text{K}}$  couplings were complete, a small amount of resin was treated in a new Bio-Rad column with a solution of  $\text{CF}_3\text{COOH}$ /water (9/1, v/v) and the column was rigorously agitated for ca. 2 h. The solution was then drained, concentrated by rotary evaporation, and the residue was dissolved in a mixture of water and  $\text{CH}_3\text{CN}$

and then injected into an analytical RP-HPLC instrument to determine if any remaining aniline was present. (If the uncoupled Abc<sup>2K</sup> aniline was observed on the chromatograph, an additional coupling was carried out.) The Glu(EDANS) residue was coupled to the resin by pre-activating Fmoc-Glu(EDANS)-OH (220 mg, 0.35 mmol) with HCTU (145 mg, 0.35 mmol) in ca. 1 mL of 20% 2,4,6-collidine–DMF. The coupling solution was added to the resin and the resin was gently agitated for ca. 48 h. To avoid degradation of the EDANS group, Fmoc deprotections that followed the couplings of Fmoc-Glu(EDANS)-OH were accomplished by soaking the resin with a solution of DBU (1.2 mL) and HOBT (0.99 g) in DMF (88 mL) (4 × ca. 2 mL for 1 min each).<sup>6</sup> The resin was then washed with DMF (6 × ca. 5 mL, 1 min each) and then CH<sub>2</sub>Cl<sub>2</sub> 6 × ca. 5 mL, 1 min each). After the coupling of the final two lysine residues and removal of last Fmoc group using the above DBU procedure, the aniline was acetylated by the addition of acetic anhydride (7-10 drops) in ca. 2 mL of 20% 2,4,6-collidine–DMF and the resin was gently agitated for 10 min. After the resin was soaked with DMF (4 × ca. 5 mL, for 1 min) and CH<sub>2</sub>CH<sub>2</sub> (6 × ca. 5 mL, for 1 min), the resin was then transferred to a small round bottomed flask equipped with a magnetic stirring bar, and mixed with 10-20 mL of CF<sub>3</sub>COOH/water (9/1, v/v) for 4 h while being protected from light sources. The resin was then filtered off using a fritted funnel, washed with additional cleavage cocktail, concentrated by rotary evaporation, and the resultant oil was dissolved in a mixture of water and CH<sub>3</sub>CN. The oligomer was purified by preparative RP-HPLC (water–CH<sub>3</sub>CN buffers with 0.1 % TFA). (The oligomers typically eluted between 20 and 30% CH<sub>3</sub>CN). Pure fractions of the product were concentrated by rotary evaporation to remove most of

---

<sup>6</sup> Tickler, A. K.; Barrow, C. J.; Wade, J. D. *J. Pept. Sci.* **2001**, 7, 488.

the CH<sub>3</sub>CN, frozen, and then lyophilized to afford a red powder (5–10 mg). The remaining less pure HPLC fractions were also lyophilized into a red powder (5–10 mg) and stored for future use.

Ac-Lys-Lys-Glu(EDANS)-(Abc<sup>2K</sup>)<sub>1</sub>-Lys(DabcyI)-Lys-Lys-NH<sub>2</sub> TFA salt **10a**  
Analytical RP-HPLC chromatograph and mass spectrum (ESI-MS)

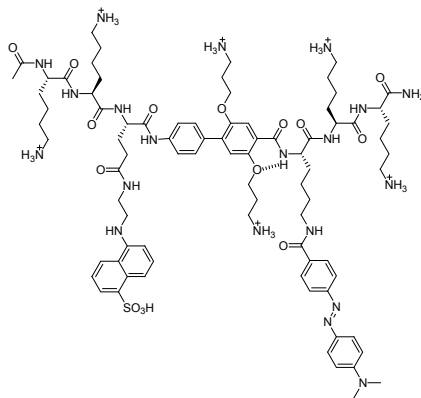

(a) Analytical RP-HPLC (5-50% acetonitrile with 0.1% TFA over 10 min,  $\lambda = 214$ )

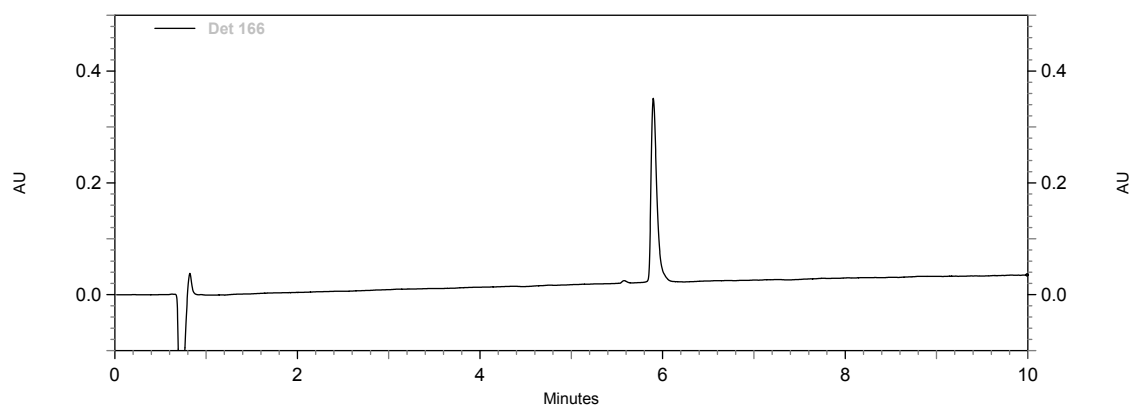

(b) ESI Mass spectrum. (Calcd exact mass for C<sub>83</sub>H<sub>120</sub>N<sub>20</sub>O<sub>15</sub>S [M] = 1668.90)

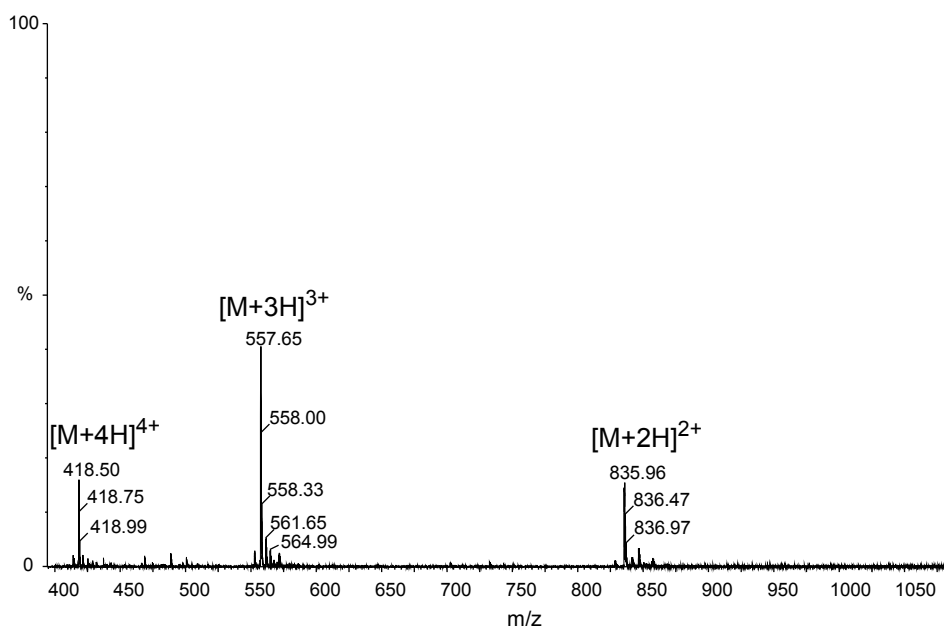



Ac-Lys-Lys-Glu(EDANS)-(Abc<sup>2K</sup>)<sub>2</sub>-Lys(DabcyI)-Lys-Lys-NH<sub>2</sub> TFA salt **10b**  
 Analytical RP-HPLC chromatograph and mass spectrum (ESI-MS)

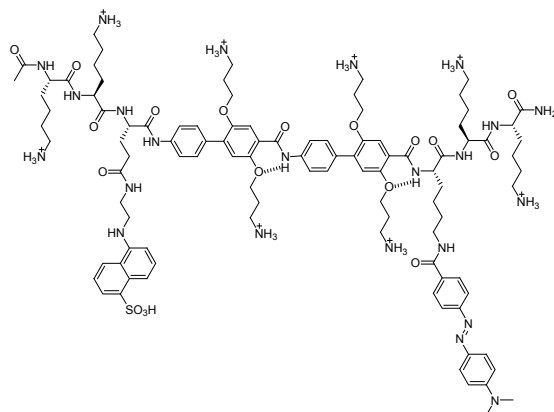

(a) Analytical RP-HPLC (5-50% acetonitrile with 0.1% TFA over 10 min,  $\lambda = 214$ )

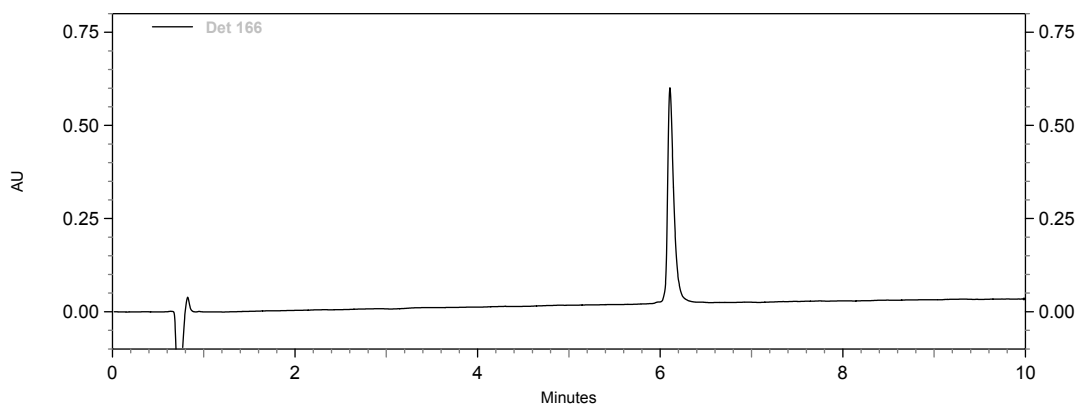

(b) ESI Mass spectrum. (Calcd exact mass for C<sub>102</sub>H<sub>143</sub>N<sub>23</sub>O<sub>18</sub>S [M] = 2011.44)

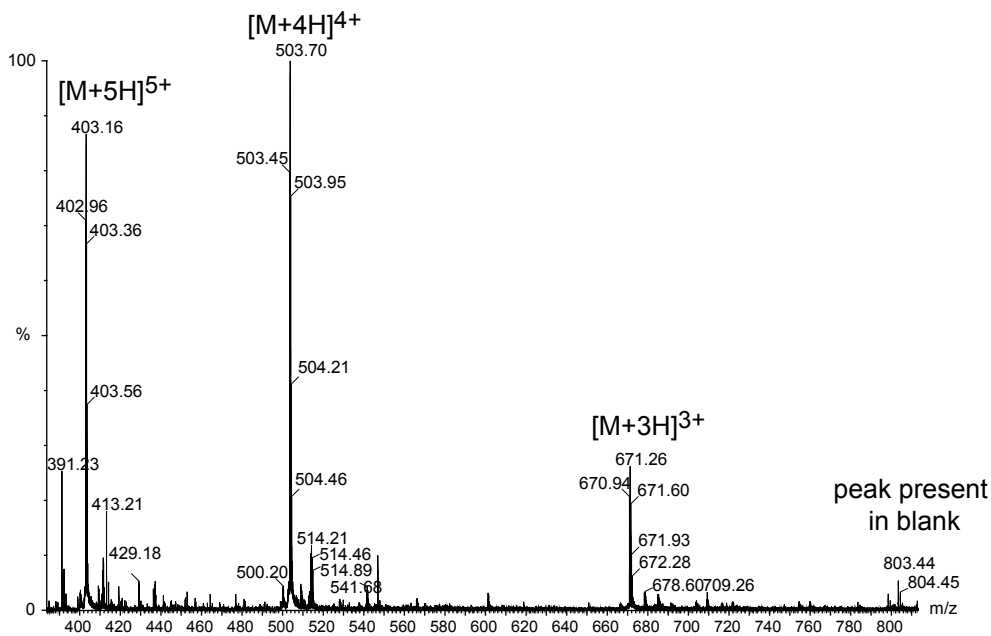

Ac-Lys-Lys-Glu(EDANS)-(Abc<sup>2K</sup>)<sub>3</sub>-Lys(Dabcyl)-Lys-Lys-NH<sub>2</sub> TFA salt **10c**  
Analytical RP-HPLC chromatograph and mass spectrum (ESI-MS)

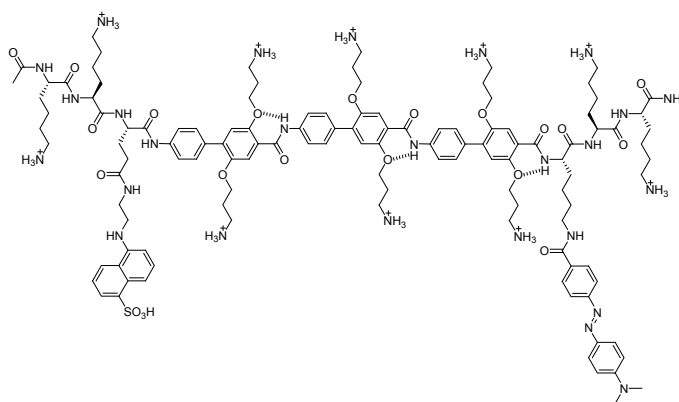

(a) Analytical RP-HPLC (5-50% acetonitrile with 0.1% TFA over 20 min,  $\lambda = 214$ )

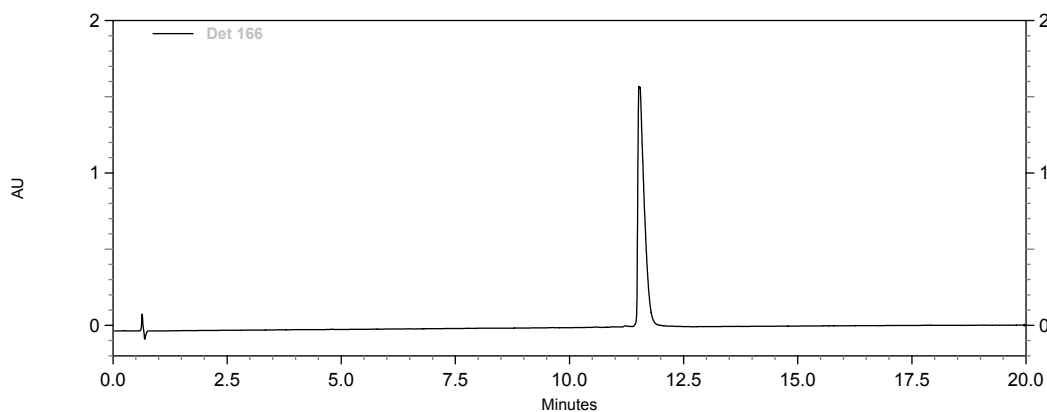

(b) ESI Mass spectrum. (Calcd mass exact for C<sub>121</sub>H<sub>166</sub>N<sub>26</sub>O<sub>21</sub>S [M] = 2351.24)

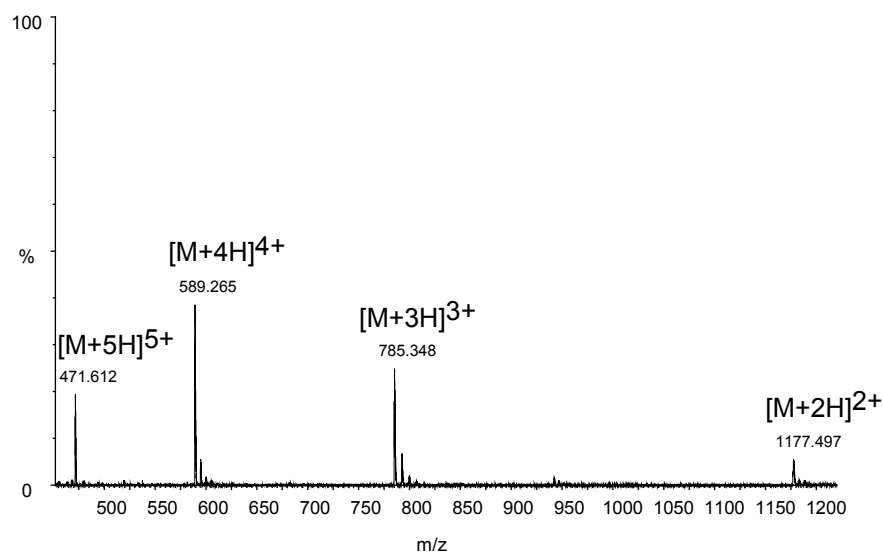

Ac-Lys-Lys-Glu(EDANS)-(Abc<sup>2K</sup>)<sub>4</sub>-Lys(DabcyI)-Lys-Lys-NH<sub>2</sub> TFA salt **10d**  
Analytical RP-HPLC chromatograph and mass spectrum (ESI-MS)

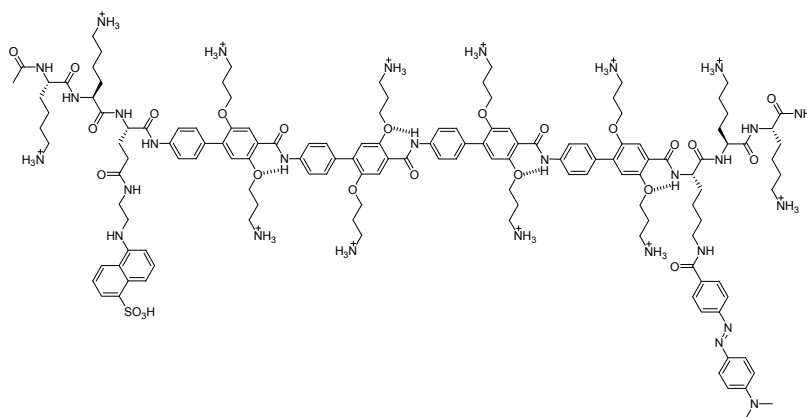

(a) Analytical RP-HPLC (5-50% acetonitrile with 0.1% TFA over 20 min,  $\lambda = 214$ )

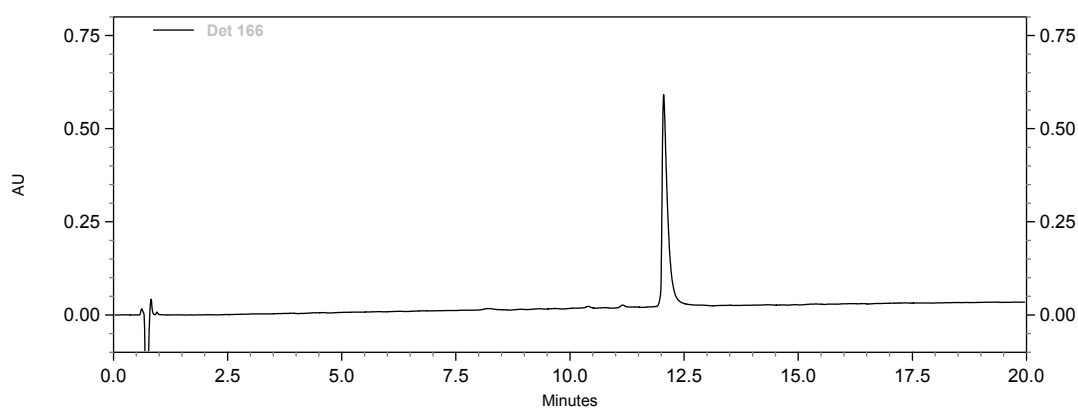

(b) ESI Mass spectrum. (Calcd exact mass for C<sub>140</sub>H<sub>189</sub>N<sub>29</sub>O<sub>24</sub>S [M] = 2692.42)

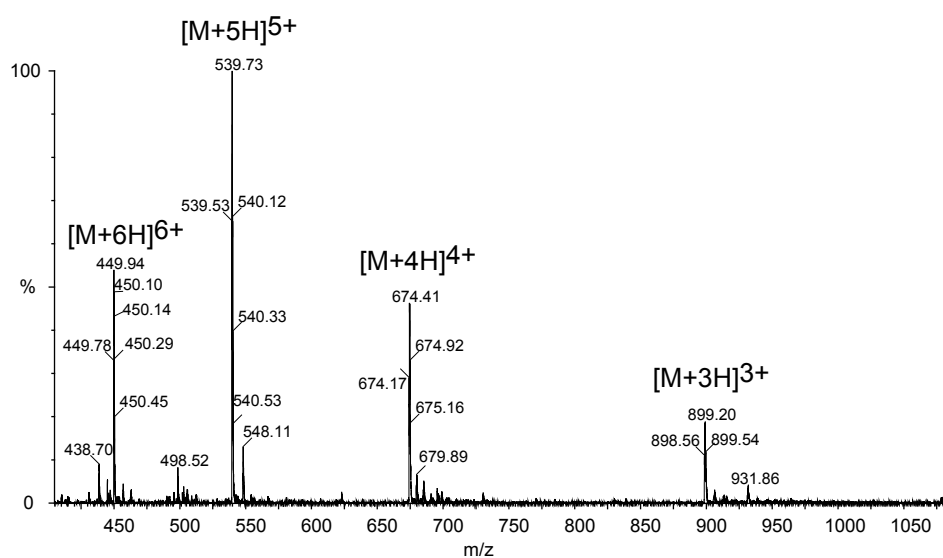

Ac-Lys-Lys-Glu(EDANS)-(Abc<sup>2K</sup>)<sub>5</sub>-Lys(DabcyI)-Lys-Lys-NH<sub>2</sub> TFA salt **10e**  
 Analytical RP-HPLC chromatograph and mass spectrum (ESI-MS)

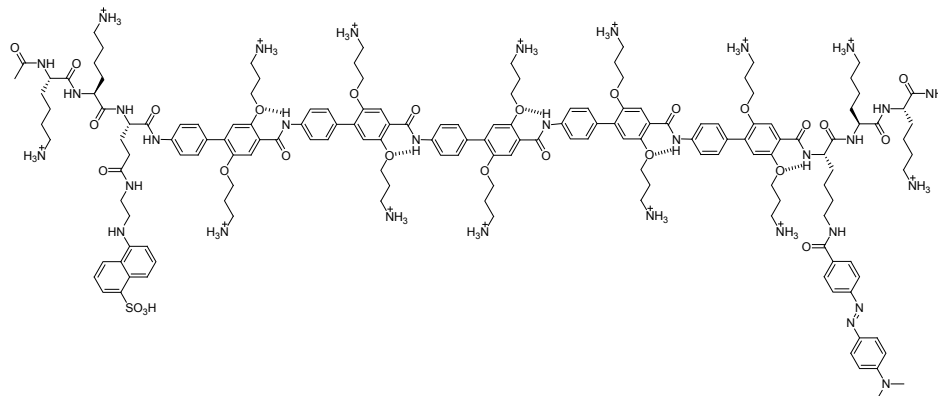

(a) Analytical RP-HPLC (5-50% acetonitrile with 0.1% TFA over 20 min,  $\lambda = 214$ )

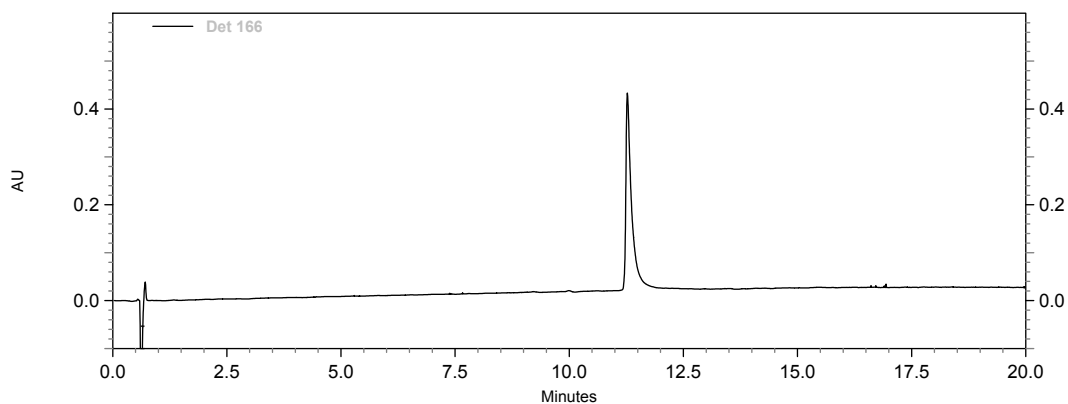

(b) ESI Mass spectrum. (Calcd exact mass for C<sub>159</sub>H<sub>212</sub>N<sub>32</sub>O<sub>27</sub>S [M] = 3033.59)

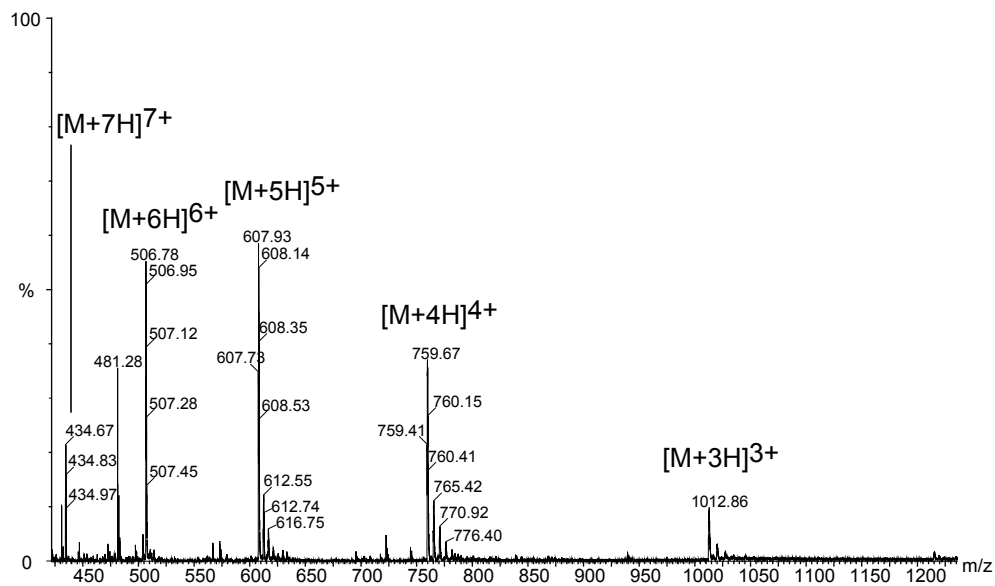

Ac-Lys-Lys-Glu(EDANS)-(Abc<sup>2K</sup>)<sub>6</sub>-Lys(DabcyI)-Lys-Lys-NH<sub>2</sub> TFA salt **10f**  
Analytical RP-HPLC chromatograph and mass spectrum (ESI-MS)

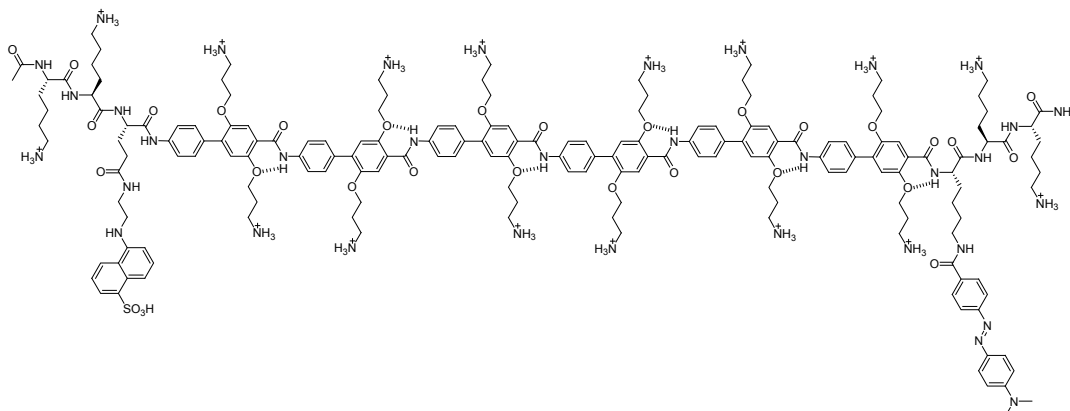

(a) Analytical RP-HPLC (5-50% acetonitrile with 0.1% TFA over 20 min,  $\lambda = 214$ )

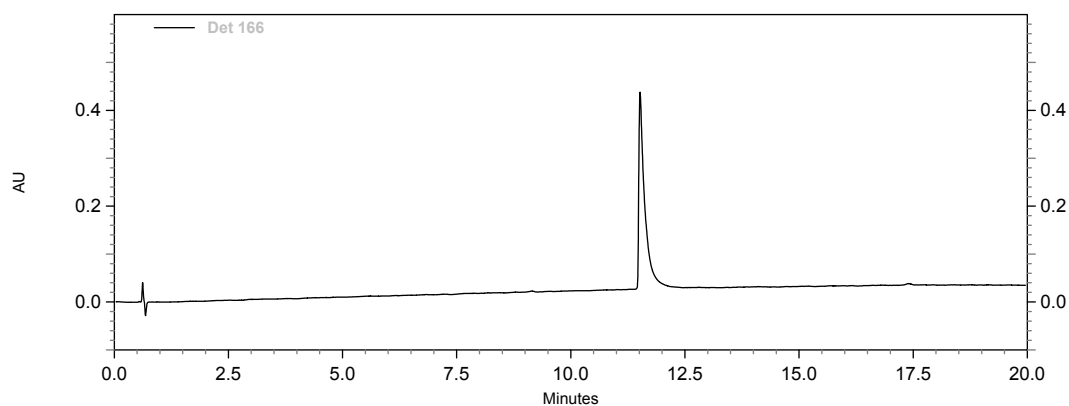

(b) ESI Mass spectrum. (Calcd exact mass for C<sub>178</sub>H<sub>235</sub>N<sub>35</sub>O<sub>30</sub>S [M] = 3374.77)

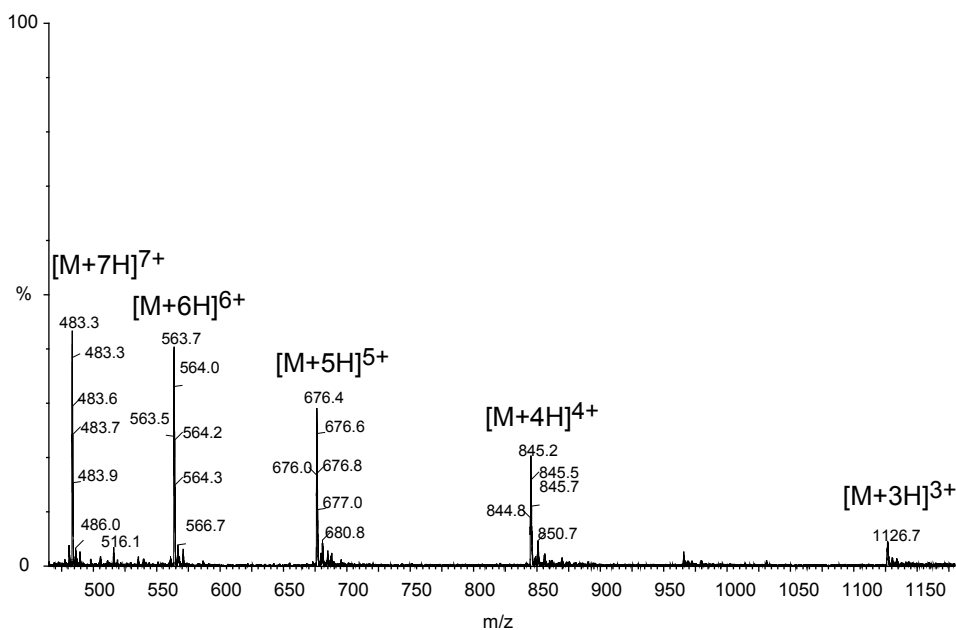

Ac-Lys-Lys-Glu(EDANS)-(Abc<sup>2K</sup>)<sub>7</sub>-Lys(DabcyI)-Lys-Lys-NH<sub>2</sub> TFA salt (**10g**)  
Analytical RP-HPLC chromatograph and mass spectrum (ESI-MS)

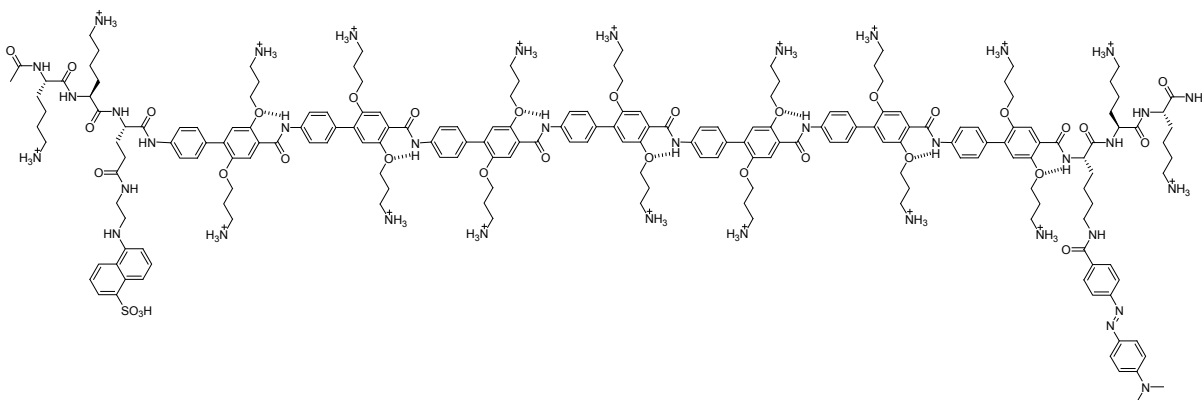

(a) Analytical RP-HPLC (5-50% acetonitrile with 0.1% TFA over 20 min,  $\lambda = 214$ )

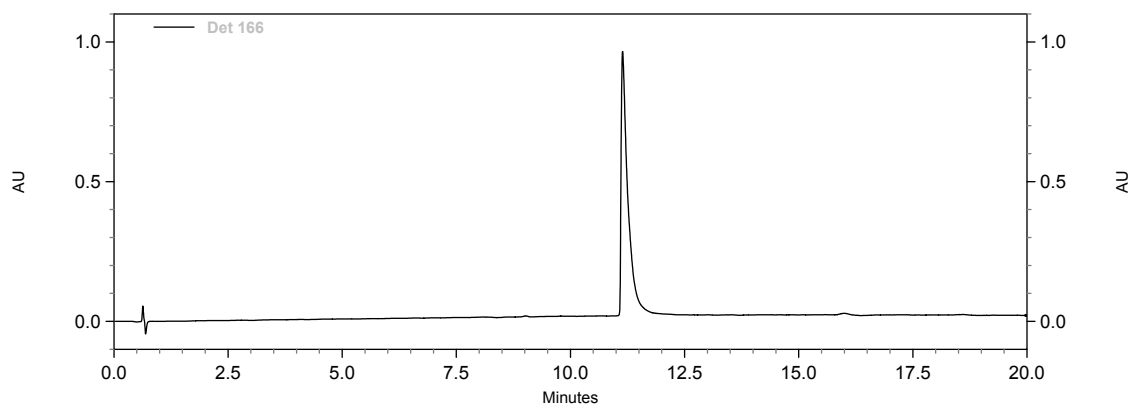

(b) ESI Mass spectrum. (Calcd exact mass for C<sub>197</sub>H<sub>258</sub>N<sub>38</sub>O<sub>33</sub>S [M] = 3715.94)

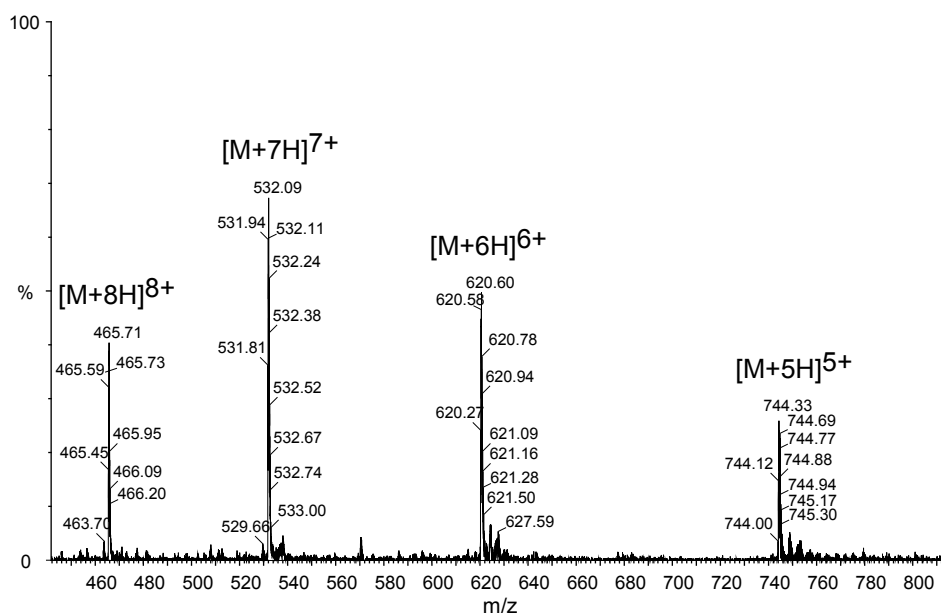

Ac-Lys-Lys-Glu(EDANS)-(Abc<sup>2K</sup>)<sub>8</sub>-Lys(DabcyI)-Lys-Lys-NH<sub>2</sub> TFA salt **10h**  
Analytical RP-HPLC chromatograph and mass spectrum (ESI-MS)

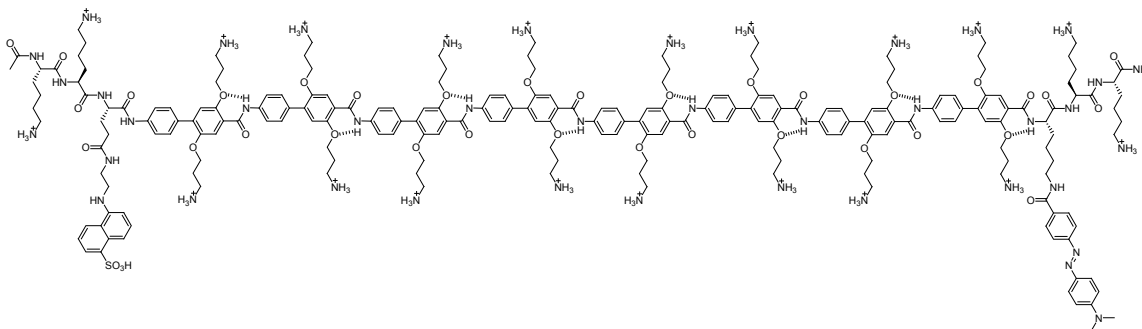

(a) Analytical RP-HPLC (5-50% acetonitrile with 0.1% TFA over 20 min,  $\lambda = 214$ )

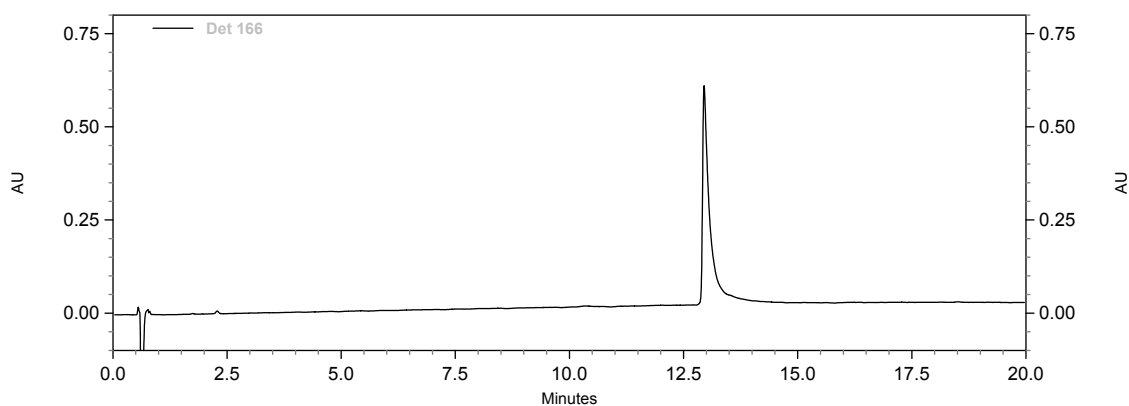

(b) ESI Mass spectrum. (Calcd exact mass for C<sub>216</sub>H<sub>281</sub>N<sub>41</sub>O<sub>36</sub>S [M] = 4057.11)

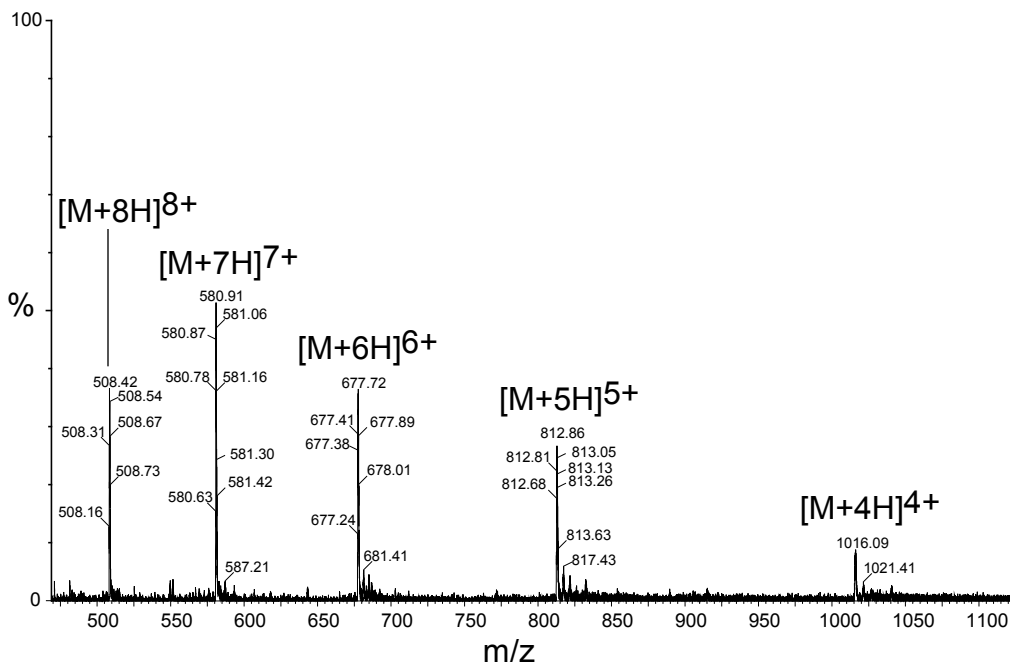

Ac-Lys-Lys-Glu(EDANS)-(Abc<sup>2K</sup>)<sub>9</sub>-Lys(Dabcyl)-Lys-Lys-NH<sub>2</sub> TFA salt **10i**  
Analytical RP-HPLC chromatograph and mass spectrum (ESI-MS)

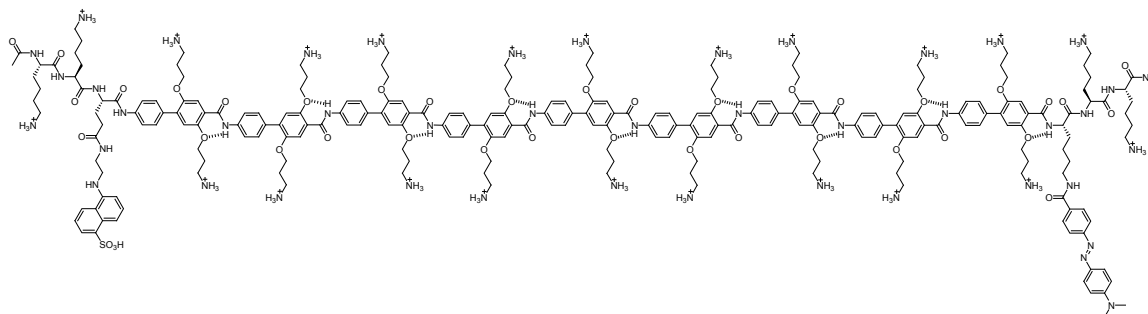

(a) Analytical RP-HPLC (5-50% acetonitrile with 0.1% TFA over 20 min,  $\lambda = 214$ )

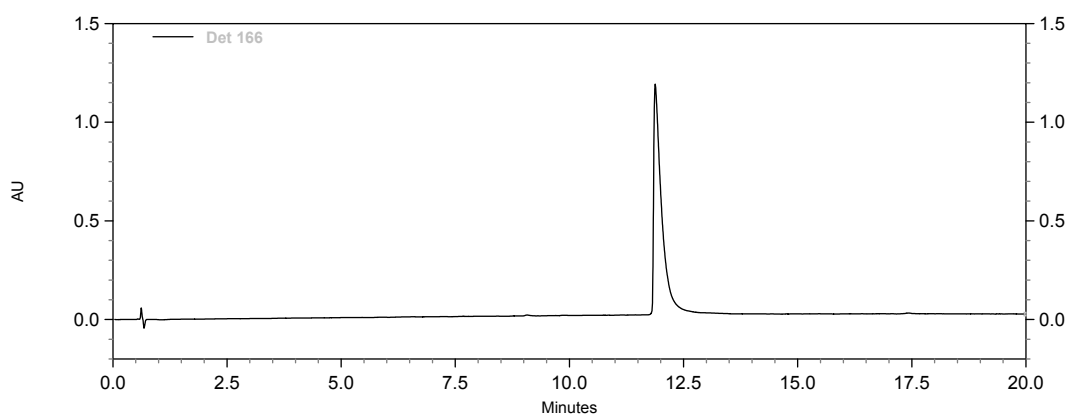

(b) ESI Mass spectrum. (Calcd exact mass for C<sub>235</sub>H<sub>304</sub>N<sub>44</sub>O<sub>39</sub>S [M] = 4398.29)

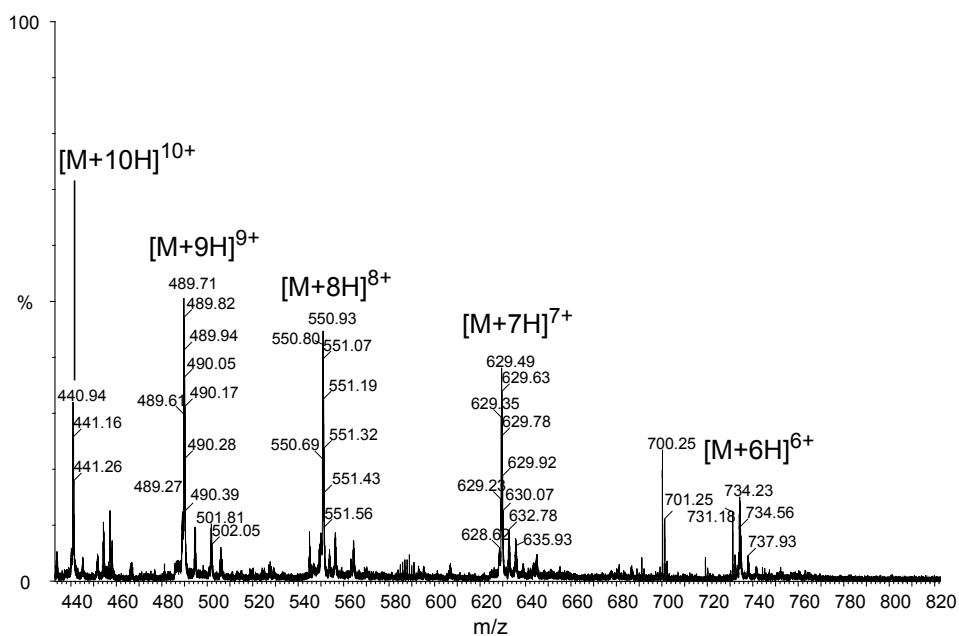



Ac-Lys-Lys-Glu(EDANS)-(Abc<sup>2K</sup>)<sub>10</sub>-Lys(Dabcyl)-Lys-Lys-NH<sub>2</sub> TFA salt **10j**  
Analytical RP-HPLC chromatograph and mass spectrum (ESI-MS)

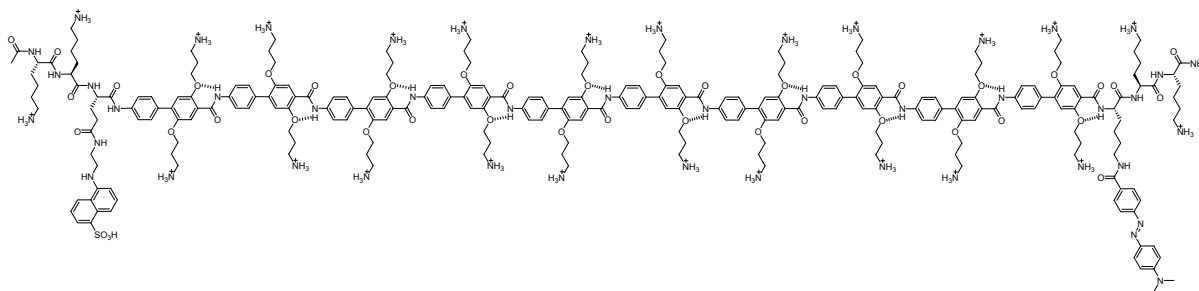

(a) Analytical RP-HPLC (5-50% acetonitrile with 0.1% TFA over 20 min,  $\lambda = 214$ )

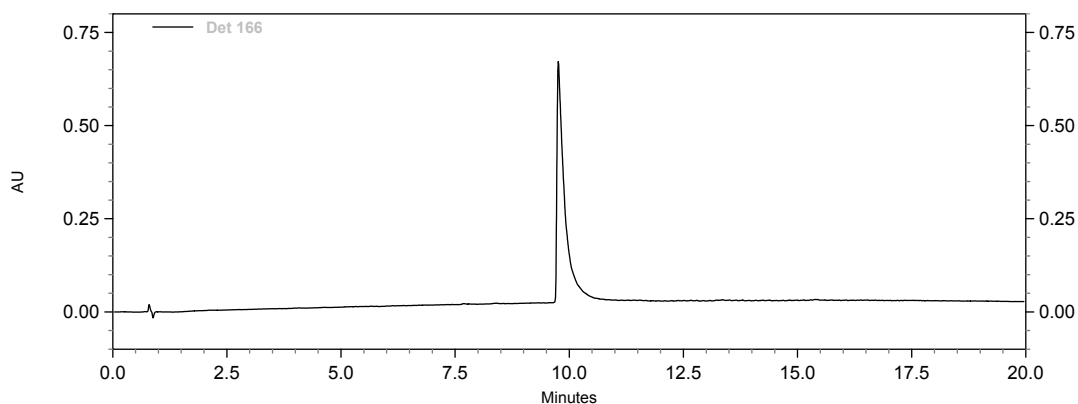

(b) ESI Mass spectrum. (Calcd exact mass for C<sub>254</sub>H<sub>327</sub>N<sub>47</sub>O<sub>42</sub>S [M] = 4739.46)

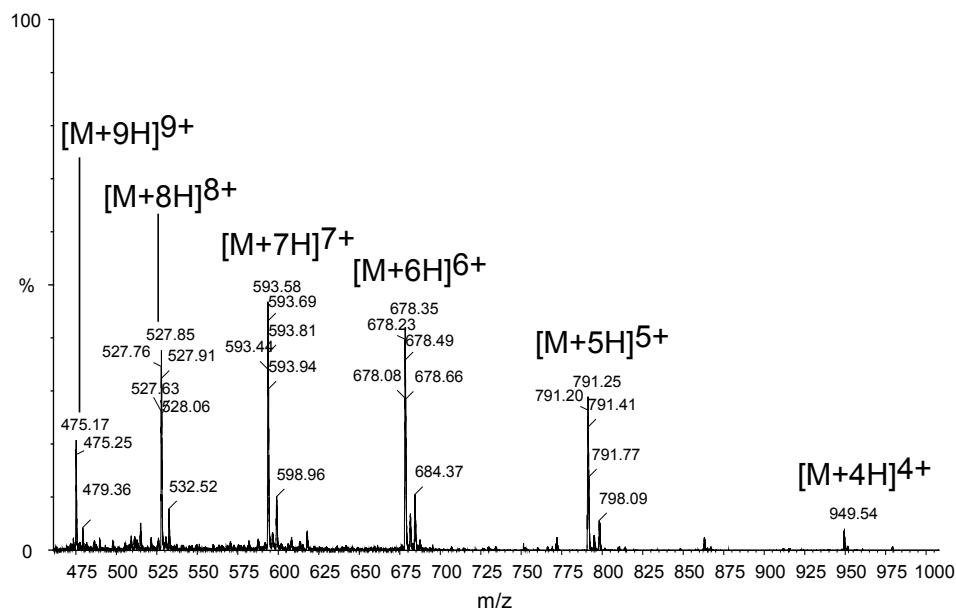

**Synthesis of H-Arg-Gly-Asp-Phe-(Abc<sup>2K</sup>)<sub>2</sub>-Arg-Gly-Asp-Phe-NH<sub>2</sub> (11).** Rink amide MBHA resin (59 mg, 0.34 mmol/g, Novabiochem) contained in Bio-Rad Poly-Prep chromatography column was soaked with DMF (3 × ca. 5 mL, 1 min each) and drained under nitrogen pressure. Fmoc deprotection was carried out by soaking the resin with a solution of 20% piperidine–DMF (1 × ca. 5 mL for 1 min, 1 × ca. 5 mL for 20 min) and gently agitating the resin. After deprotection of the Fmoc group, the resin was soaked with DMF (5 × ca. 3 mL for 1 min) and CH<sub>2</sub>Cl<sub>2</sub> (5 × ca. 3 mL for 1 min). Standard amino acids were coupled to the resin using 4 equiv with HCTU (4 equiv) in a ca. 1-mL solution of 20% 2,4,6-collidine–DMF, and the resin was gently agitated for 2–4 h (or in some cases was allowed to couple overnight). Fmoc-Abc<sup>2K(Boc)</sup>-OH (**1**) was coupled to the resin using 2 equiv with HCTU (2 equiv) in a ca. 1-mL solution of 20% 2,4,6-collidine–DMF. The solution was added to the resin and the resin was gently agitating for 4–12 h. Couplings to the α-amino groups of standard amino acids were monitored by the ninhydrin test to determine coupling completeness. Couplings to the aniline amino groups of Abc<sup>2K</sup> were not monitored and assumed to be complete. The peptide was cleaved from resin using 10–20 mL of CF<sub>3</sub>COOH/water/triisopropylsilane (8/1/1, v/v/v) and mixed for ca. 6 h. Purification was accomplished using preparative RP-HPLC (water–CH<sub>3</sub>CN buffers with 0.1 % TFA) and resulted in a yield of 12 mg (29%) of peptide **11**. (The 12 mg of peptide **11** had a purity of >99% and the 29% yield does not include the HPLC fractions that showed a purity level of 95%.)

# H-Arg-Gly-Asp-Phe-(Abc<sup>2K</sup>)<sub>2</sub>-Arg-Gly-Asp-Phe-NH<sub>2</sub> TFA salt (**11**) Analytical RP-HPLC chromatograph and mass spectrum (ESI-MS)

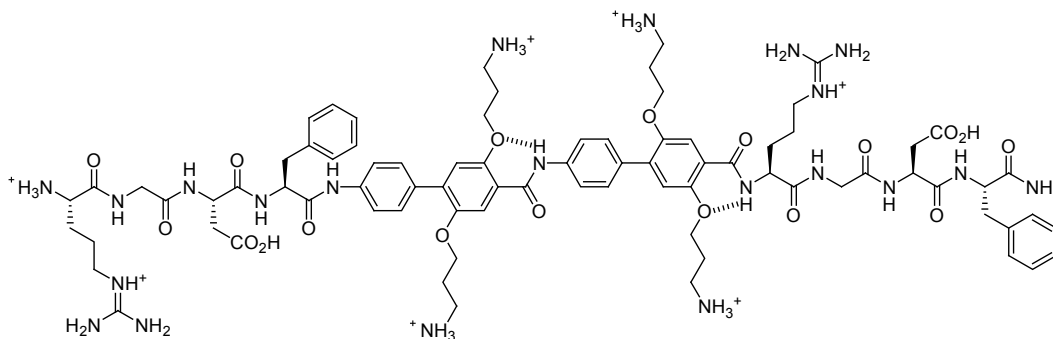

(a) Analytical RP-HPLC (5-50% acetonitrile with 0.1% TFA over 20 min,  $\lambda = 214$ )

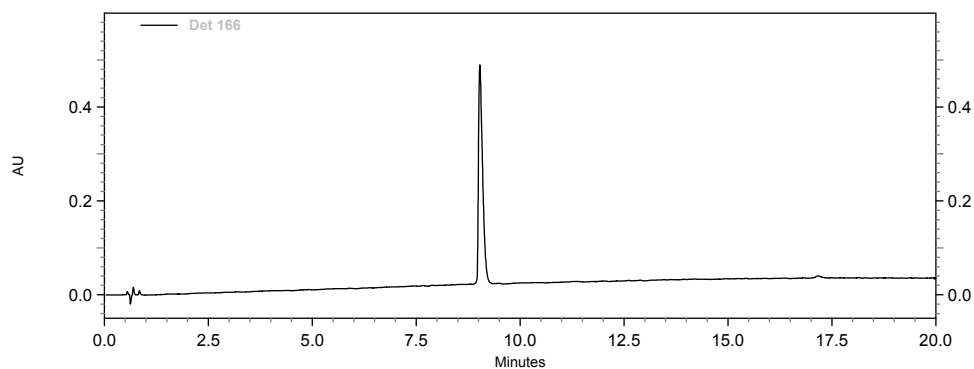

(b) ESI Mass spectrum. (Calcd exact mass for C<sub>80</sub>H<sub>107</sub>N<sub>21</sub>O<sub>18</sub> [M] = 1649.81)

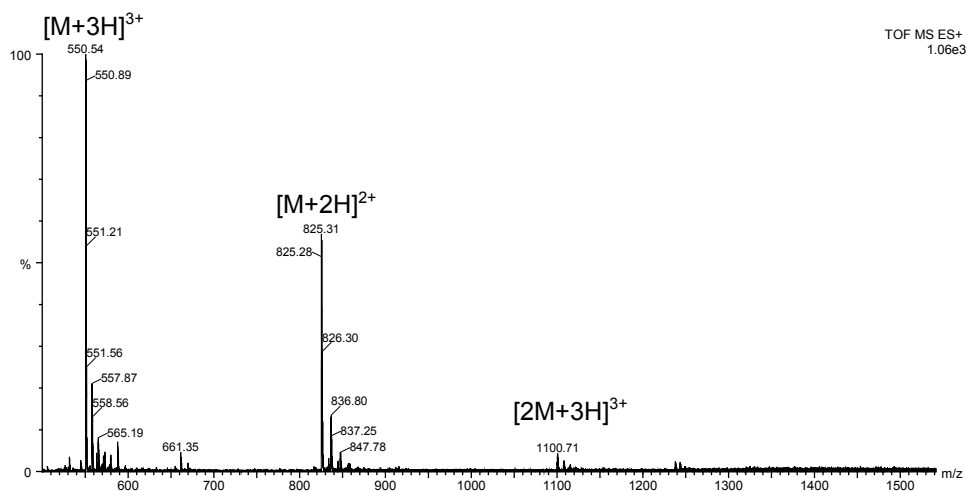

# H-Arg-Gly-Asp-Phe-(Abc<sup>2k</sup>)<sub>2</sub>-Arg-Gly-Asp-Phe-NH<sub>2</sub> TFA salt 11

## Supporting Information

Current Data Parameters  
 USER cgotha  
 NAME c3-10-290  
 EXPNO 2  
 PROCNO 1

F2 - Acquisition Parameters  
 Date\_ 20070120  
 Time 15:42  
 INSTRON cryos00  
 PROBHD 5 mm CPCL1 H-  
 PULPROG zgpg30  
 TD 81738  
 SFO1 500.1350000 MHz  
 SOLVENT D<sub>2</sub>O  
 NS 128  
 DS 2  
 SWH 8012.820 Hz  
 FIDRES 0.098043 Hz  
 AQ 5.0989774 sec  
 RG 6.3  
 DM 62.400 usec  
 DE 6.00 usec  
 TE 298.0 K  
 TL 0.1000000 sec  
 ACQST 0.0100000 sec  
 MCWK 0.01500000 sec

===== CHANNEL f1 =====  
 NUC1 <sup>1</sup>H  
 P1 8.00 usec  
 PL1 1.60 dB  
 SFO1 500.2235015 MHz

F2 - Processing parameters  
 SI 65536  
 SF 500.2200014 MHz  
 MDW EN  
 USB 0 Hz  
 GB 0  
 PC 4.00

1D NMR plot parameters  
 CX 22.80 cm  
 CY 97.22 cm  
 F1P 9.000 ppm  
 F1 4501.98 Hz  
 F2P 0.000 ppm  
 F2 0.00 Hz  
 PRCN 0.39474 ppm/cm  
 HZCN 197.45528 Hz/cm

Gothard, J. S. Nowick

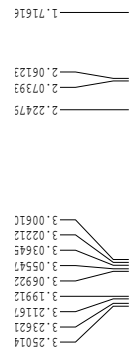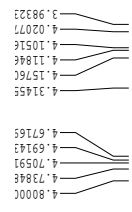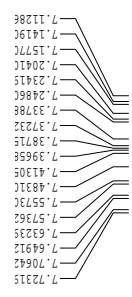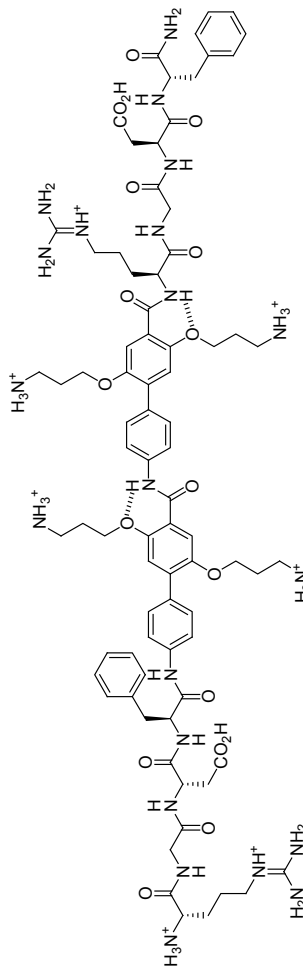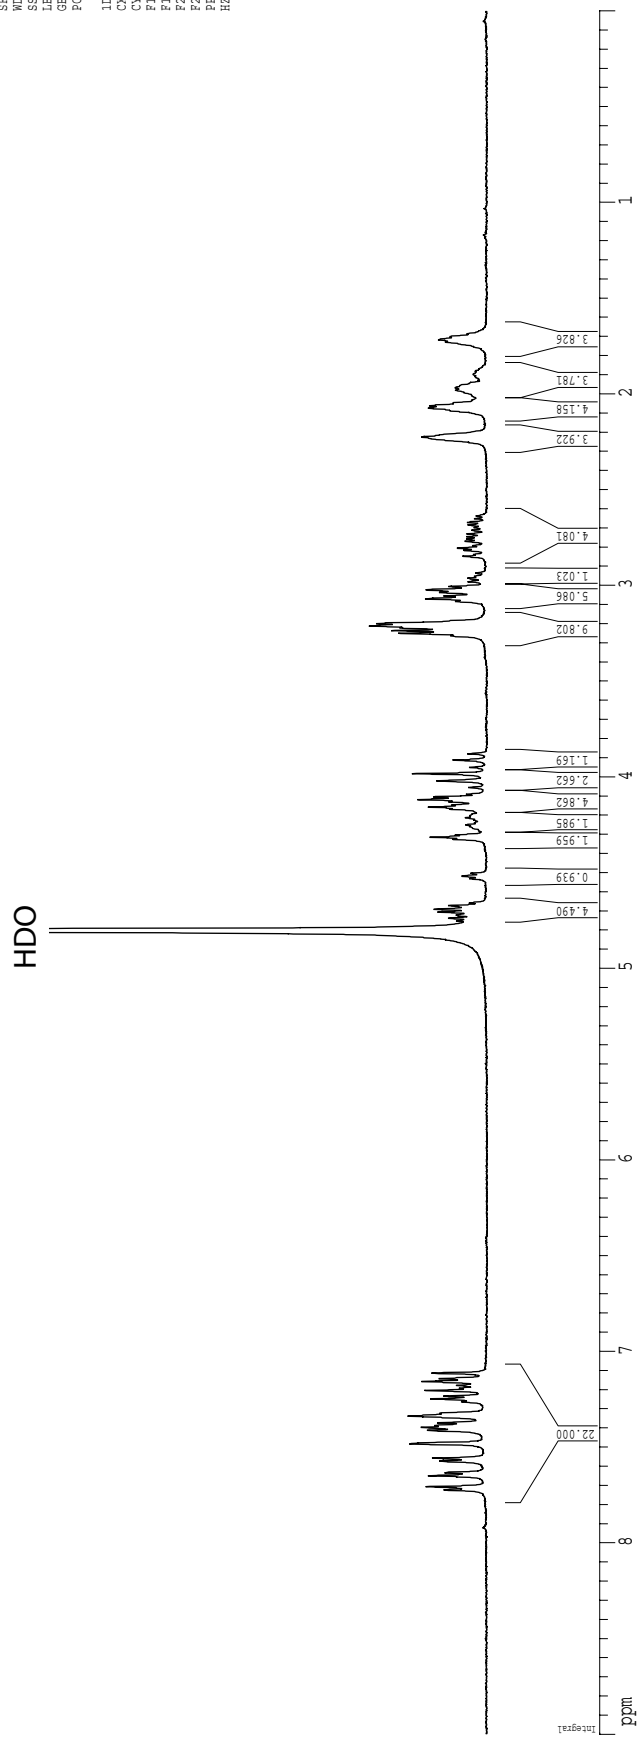

**FRET Experiments.** Fluorescence resonance energy transfer studies on labeled Abc<sup>2K</sup> oligomers, Ac-(Lys)<sub>2</sub>-Glu(EDANS)-(Abc<sup>2K</sup>)<sub>n</sub>-Lys(Dabcyl)-(Lys)<sub>2</sub>-NH<sub>2</sub> (n=1–10), were carried out using a Hitachi F-4500 Fluorescence Spectrophotometer. Concentrations for initial stock solutions were determined spectrophotometrically based on the extinction coefficient of Dabcyl ( $\epsilon = 32,000$ ). Serial dilutions were carried out on the stock solutions to make 1.75  $\mu\text{M}$  (water/DMSO 1/1) solutions. Samples were excited at 335 nm and their fluorescence was observed from 400 to 600 nm. Additional instrument parameters were set as follows: excitation slit (nm) = 10, emission slit (nm) = 10, PMT voltage (V) = 700, response (sec.) = auto, shutter control = on, scan speed = 60.

## FRET Experiments of Compounds 10a-10j.

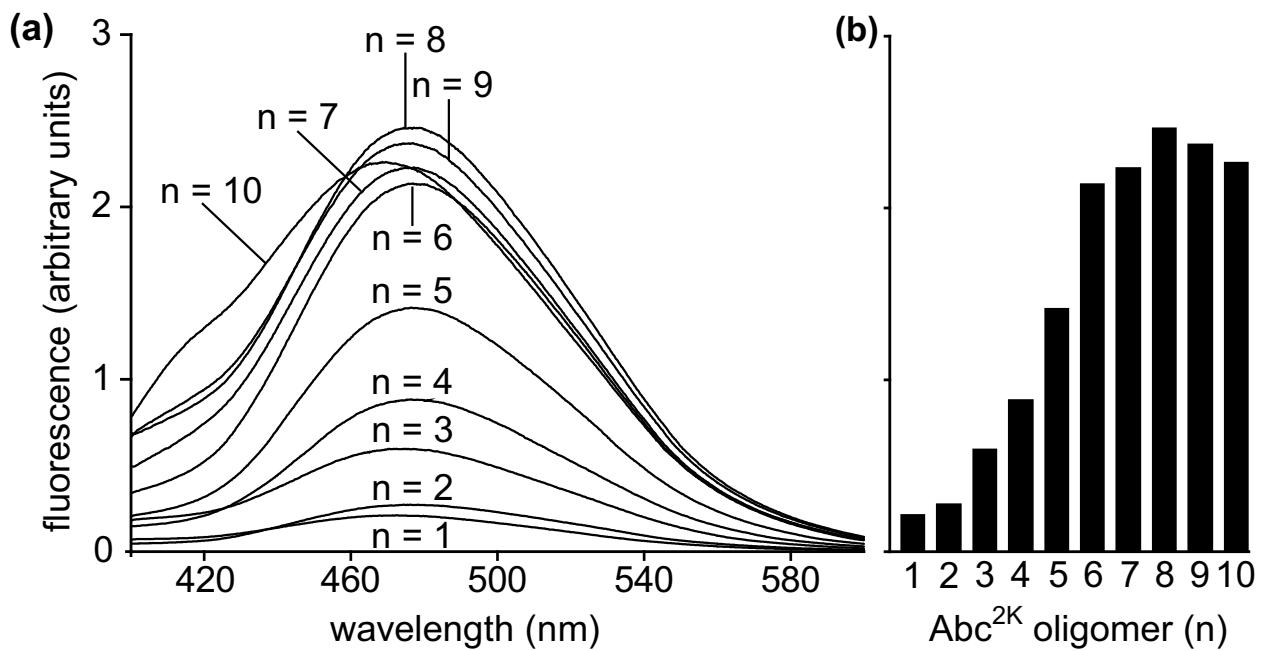

Supplement: NIHMS62392-supplement-si20070507_095.pdf [file NIHMS62392-supplement-si20070507_095.pdf]
